1 Characterization of BLUF-photoreceptors present in  
2 *Acinetobacter nosocomialis*.

3 Inés Abatedaga<sup>1¶</sup>, Bárbara Pérez Mora<sup>2¶</sup>, Marisel Tuttobene<sup>2</sup>, Gabriela Müller<sup>2</sup>, Daiana  
4 Biancotti<sup>2</sup>, Claudio D. Borsarelli<sup>1</sup>, Lorena Valle<sup>1\*</sup>, Maria A. Mussi<sup>2\*</sup>

5  
6 \* co-corresponding authors

7 E-mail: [mussi@cefobi-conicet.gov.ar](mailto:mussi@cefobi-conicet.gov.ar) (MAM); [lvalle@unse.edu.ar](mailto:lvalle@unse.edu.ar) (LV)

8  
9 ¶ These authors contributed equally to this work

10  
11  
12  
13  
14 <sup>1</sup> Instituto de Bionanotecnología del NOA (INBIONATEC-CONICET), Universidad  
15 Nacional de Santiago del Estero (UNSE), Santiago del Estero, Argentina

16 <sup>2</sup> Centro de Estudios Fotosintéticos y Bioquímicos (CEFOBI-CONICET), Universidad  
17 Nacional de Rosario (UNR), Rosario, Argentina

## 21 **Abstract**

22 *Acinetobacter nosocomialis* is a Gram-negative opportunistic pathogen, whose ability to cause  
23 disease in humans is well recognized. Blue light has been shown to modulate important  
24 physiological traits related to persistence and virulence in this microorganism. In this work, we  
25 characterized the three Blue Light sensing Using FAD (BLUF) domain-containing proteins encoded  
26 in the *A. nosocomialis* genome, which account for the only "traditional" light sensors present in  
27 this microorganism. By focusing on a light-modulated bacterial process such as motility, the  
28 temperature dependence of light regulation was studied, as well as the expression pattern and  
29 spectroscopic characteristics of the different *A. nosocomialis* BLUFs. Our results show that the  
30 three BLUF-containing proteins encode active photoreceptors, despite only two of them are stable  
31 in the light-regulatory temperature range when expressed recombinantly. *In vivo*, only the *A.*  
32 *baumannii*'s ortholog AnBLUF65 is expressed, which is active in a temperature range from 15 °C to  
33 37 °C. In turn, AnBLUF46 is an active photoreceptor between 15 °C to 32 °C *in vitro*, but is not  
34 expressed in *A. nosocomialis* in the conditions tested. Intra-protein interactions were analyzed  
35 using 3D models built based on *A. baumannii*'s photoreceptor, to support spectroscopic data and  
36 profile intra-protein residue interactions. A general scheme is presented on how  
37 hydrophobic/aromatic interactions may contribute to the stability of dark/light- adapted states,  
38 indicating the importance of these interactions in BLUF photoreceptors.

39

## 40 Introduction

41 *Acinetobacter nosocomialis* is a Gram-negative coccobacillus, member of the *Acinetobacter*  
42 *calcoaceticus-Acinetobacter baumannii* (ACB) complex [1]. While *A. baumannii* predominates over  
43 all other members of the ACB complex in terms of incidence, poorer clinical outcomes, and  
44 antibiotic resistance rates, *A. nosocomialis* has gained recognition also as a clinically relevant  
45 human pathogen [2].

46 Although *Acinetobacter* spp. are primarily associated with pneumonia, they are also frequent  
47 causes of wound and burn infections, meningitis, urinary tract infections, and sepsis [3]. There is a  
48 growing trend for these isolates to display high levels of antibiotic resistance, with some being  
49 resistant to all clinically available antibiotics [4].

50 The ability of *A. nosocomialis* to cause disease in humans is well-recognized [5-7]. Many potential  
51 virulence factors have been identified in *A. nosocomialis* and include a CTFR inhibitory factor (Cif),  
52 a protein O-glycosylation system, a type-I secretion system, a type-II secretion system, secretion of  
53 outer membrane vesicles, the OmpA protein, the CpaA protease, and quorum sensing [2].

54 We have previously shown that *A. nosocomialis* is able to sense and respond to light modulating  
55 biofilm formation and motility at 24 °C [8]. Also, we have shown that light modulates persistence,  
56 metabolism, the ability to grow under iron limiting conditions and virulence in this microorganism  
57 [9]. The genome of *A. nosocomialis* RUH2624 encodes three Blue Light sensing Using FAD (BLUF)-  
58 domain containing proteins, as the only "traditional" light sensors [8]. Extensive work performed  
59 on *A. baumannii* showed that this microorganism encodes only one BLUF-type photoreceptor,  
60 designated BlsA, which functions at low-environmental temperatures up to 24 °C and is regulated  
61 both at the transcriptional level as well as the activity of the photocycle [10, 11]. Also other BLUFs  
62 from *Acinetobacter* have been characterized based on light induced phenotypes, gene knockouts  
63 and transcriptomic analyses [12, 13]. In this work, we present evidence indicating that regulation

64 of motility by light in *A. nosocomialis* is maintained in a wide range of temperatures from 24 to 37  
65 °C. Recombinant expression, purification and characterization of the different BLUF-domain  
66 containing-proteins showed that the three of them encode active photoreceptors; however only  
67 AnBLUF46 and AnBLUF65 are stable. Interestingly, only *anbluf65* is expressed *in vivo* and exhibits a  
68 stable photocycle in the temperature-range at which light regulates motility in *A. nosocomialis*.  
69 Spectroscopic characterization and analyses of 3D models built for these proteins provide insights  
70 into the intra-protein signaling process connecting the widely characterized BLUF photophysics  
71 with the subtle re-arrangements located in the C-terminal part of these proteins. Finally,  
72 proteomic analyses revealed that light mainly regulates proteins related to signalling and cellular  
73 metabolism.  
74

## 75 **Material and Methods**

### 76 **Bacterial Strains, Plasmids, and Media.**

77 Luria-Bertani (LB) broth (Difco) and agar (Difco) were used to grow and maintain bacterial strains.

78 Broth cultures were incubated at the indicated temperatures either statically or with shaking at

79 200 rpm.

### 80 **Blue light treatments.**

81 Blue light treatments were performed as described in our previous studies [8-11, 14-18]. Briefly,

82 cells were incubated at different temperatures in the dark or under blue light emitted by 9-light-

83 emitting diode (LED) arrays, with an intensity of 6 to 10  $\mu\text{mol photons m}^{-2} \text{s}^{-1}$ . Each array was built

84 using 3-LED module strips emitting blue light, with emission peaks centered at 462 nm,

85 determined using the LI-COR LI-1800 spectroradiometer [15].

### 86 **Cell Motility assays.**

87 Cell motility was tested on 1% tryptone, 0.5% NaCl, 0.3% agarose plates inoculated on the surface

88 by depositing 3  $\mu\text{l}$  of Tryptic Soy Broth (TSB) cultures grown to an optical density at 660 nm ( $\text{OD}_{660}$ )

89 of 0.3. The plates were incubated in the presence or absence of blue light at the indicated

90 temperatures for 24 hours or else specified. Three independent experiments were performed.

### 91 **Analyses of gene expression by qRT-PCR.**

92 Retrotranscription and qRT-PCR analysis were done as described in Tuttobene et al., 2019, using

93 primers listed in Table 1. Data are presented as NRQ (Normalized Relative Quantities) calculated

94 by the qBASE method [19], using *recA* and *rpoB* genes as normalizers. The *anbluf65* transcript

95 levels of each sample were normalized to the *rpoB* transcript level for each cDNA sample. Relative

96 gene expression to *rpoB* was calculated using the comparative  $2^{-\Delta\text{CT}}$  method [20]. Each cDNA

97 sample was run in technical triplicate and repeated in at least three independent sets of samples.  
98 *t*-test was used to determine whether two values were significantly different comparing data  
99 within each temperature assayed. *p*-values: \*, *p* < 0.01; \*\*, *p* < 0.001.

100 **Table 1.** Primers used in this study.

| Name      | SEQUENCE (5'-3')            | REFERENCE  |
|-----------|-----------------------------|------------|
| rpoBF_rt  | ACTTGC GTGCTGGTGTTCCTTT     | This study |
| rpoBR_rt  | ACGCGCATGCATCTTGTTCATCA     | This study |
| 1065F_rt  | GACTGTGTTATGCCAGCCAACGAA    | This study |
| 1065R_rt  | CTCCCATCTTGAGAAAGAAAGCCTCG  | This study |
| 98085F_rt | CAATGCGTAGAAGGTCAGAAAG      | This study |
| 98085R_rt | GCTGGAATAGTAGAGCTATTCAGTAA  | This study |
| 46F_rt    | ACCGTCCGAACAGCGGTTATTT      | This study |
| 46R_rt    | TGATCCGCTTTCAAATTGGGTTGA    | This study |
| 46F       | GGACATATGAGTTTAATAGGCTTTATG | This study |
| 46R       | GGATCCTTAAACTTGATATTGATCCG  | This study |

101

## 102 **Cloning, synthesis, overexpression and purification of AnBLUFs.**

103 In the case of gene *anbluf46*, a PCR product amplified from *A. nosocomialis* RUH2624 genomic  
104 DNA using primers 46F and 46R (Table 1), which contain *Nde*I and *Bam*HI restriction sites,  
105 respectively, was cloned into pGEM®T- Easy vector and then subcloned into the *Nde*I and *Bam*HI  
106 sites of pET28-TEV. In turn, *anbluf65* and *anbluf85* coding sequences were directly synthesized and  
107 subcloned into pET 28 a(+) (Genscript, USA). Thus, the different proteins were overexpressed as N-  
108 terminal His-tag fusions. Plasmids were transformed into *E. coli* BL21 (pLys) cells, which were  
109 cultured in LB broth supplemented with chloramphenicol and kanamycin at 37 °C until they  
110 reached an OD<sub>600</sub> of 0.6 to 0.7. Overexpression of the His-tagged proteins was induced with 0.5  
111 mM IPTG at 15 °C. After incubation for 5 h at 15 °C to avoid the formation of inclusion bodies, the  
112 cells were collected by centrifugation, suspended in lysis buffer (20 mM Tris [pH 8.0], 500 mM  
113 NaCl, 1 mM β- mercaptoethanol), and disrupted using liquid nitrogen and a mortar. Cell debris  
114 were removed by centrifugation at 20,000 x g for 30 min at 4 °C, and the supernatant was loaded  
115 onto a nickel nitrilotriacetic acid (Ni-NTA)-agarose column (Invitrogen). The column was washed

116 sequentially with lysis buffer containing 20 mM and 40 mM imidazole, respectively, and the His-  
117 tagged protein was eluted with the same buffer containing 250 mM imidazole (elution buffer). PD-  
118 Minitrap G-25 (GE Healthcare) columns were used to desalt and exchange the buffer to 20 mM  
119 Tris (pH 8.0) and 200 mM NaCl (working buffer). Vivaspin 500 (Sartorius) centrifugal filters (cutoff  
120 of 10 kDa) were used to concentrate the purified proteins. The purity of the overexpressed His-  
121 tagged protein was confirmed by sodium dodecyl sulfate (SDS)-PAGE 16% gels.

## 122 **Sequence analyses.**

123 Protein sequence alignments were performed using CLUSTALW ([https://www.genome.jp/tools-](https://www.genome.jp/tools-bin/clustalw)  
124 [bin/clustalw](https://www.genome.jp/tools-bin/clustalw)), and the alignments were visualized with Jalview 2 [21]. AnBLUF65 and AnBLUF46 3D  
125 modeled structures were performed using the Swiss-Model workspace/GMQE [22] in a search for  
126 template mode. In all cases, the best fit corresponded to the BlsA PDB structures (6W6Z for the  
127 dark-adapted form and 6W72 for the light-adapted form). Models were visualized and handled  
128 with PyMOL (by Schrödinger). Ring 2.0 webserver [23] was used to explore the specific  $\pi$   
129 stacking interactions in all protein models as well as other non-covalent interactions.

## 130 **Spectroscopic measurements.**

131 Absorption spectra were registered using an Ocean Optics modular UV-Vis spectrophotometer  
132 USB2000+. The assays were done using a 5x5 mm quartz cuvette (Hellma, Germany), placed in a  
133 Quantum Northwest FLASH 300 cuvette holder connected to a Peltier-based temperature  
134 controller, containing 250  $\mu$ l of air-saturated protein solution in 20 mM TRIS, 200 mM NaCl, pH 8.0  
135 buffer. Scattering effects on the absorption spectra were corrected using a|e – UV-Vis-IR Spectral  
136 Software 1.2, FluorTools ([www.fluortools.com](http://www.fluortools.com)).  
137 Light-adapted state for AnBLUFs (l-AnBLUF) was obtained by blue light irradiation of the dark-  
138 adapted form (d-AnBLUF) with a 1 W Royal Blue LED (Luxeon Star LEDs) emitting at  $443 \pm 20$  nm.  
139 Absorbance changes followed at 510 nm ( $\Delta A$ ) vs time ( $t$ ) were recorded during dark-light cycles at

140 different temperatures. The light-adapted-state formation time,  $\tau_{BLUF}$ , and the back-recovery time  
141 through thermal recovery to the dark-adapted state,  $\tau_{rec}$ , were determined using the exponential  
142 equations 1 and 2, respectively, where  $A$  is the pre-exponential factor and  $\Delta A_0$  is the initial  
143 absorbance:

$$144 \quad \Delta A = \Delta A_0 + A e^{\frac{t}{\tau_{BLUF}}} \quad (1)$$

$$145 \quad \Delta A = \Delta A_0 + A e^{\frac{-t}{\tau_{rec}}} \quad (2)$$

146

147 Fluorescence emission spectra were recorded with a Hitachi F-2500 spectrofluorometer equipped  
148 with a Hamamatsu R-928 photomultiplier. Neutral density filters (10 %T) were placed onto the  
149 excitation output beam to minimize photochemical processes during acquisition. Emission spectra  
150 were obtained by selective excitation of FAD cofactor at 460 nm. Temperature control was  
151 performed using a circulating fluid bath (Haake F3) connected to the cuvette holder.

## 152 **Protein extraction.**

153 *A. nosocomialis* was grown stagnantly in LB at 37 °C under blue light or in the dark for 24 hs, and  
154 the procedure was repeated to generate three independent biological replicates. The cells were  
155 recovered by centrifugation at 7,000 g for 10 min at 4 °C. The cells were then resuspended in 500  
156  $\mu$ l of extraction buffer (25 mM Tris pH 7.0), 0.5% Tween 20, 2 mM EDTA, 5 mM,  $\beta$ -  
157 mercaptoethanol) and lysed by sonication while keeping samples in ice. Cell debris and non lysed  
158 cells were collected by centrifugation at 12,000 rpm for 15' at 4 °C and the supernatants were  
159 carefully decanted into clean tubes and stored at -80 °C. Total protein content present in the  
160 supernatant was quantified using bicinchoninic acid (BCA) (Thermo Scientific, Germany). Then, 30  
161  $\mu$ g total proteins were loaded in SDS-PAGE (10% stacking gel and 5% running gel), and allowed to  
162 separate electrophoretically only 1 cm long within the separation gel. The gel was incubated for at



163 least 3 hs in fixing solution: 30% v/v ethanol, 2% H<sub>3</sub>PO<sub>4</sub>, and after being washed with MiliQ water,  
164 it was incubated for 1 h in staining solution: 18% v/v methanol, 17% p/v (NH<sub>4</sub>)<sub>2</sub>SO<sub>4</sub> y 2% H<sub>3</sub>PO<sub>4</sub>  
165 under vigorous shaking. Then, Coomassie G250 powder (0.5 g/L) was added and further incubated  
166 for 1 or 2 days until stained proteins were visible, which were then cut from the gel and sent to  
167 the Proteomics Core Facility of CEQUIBIEM at the University of Buenos Aires where protein  
168 digestion and Mass Spectrometry analysis were performed. Samples were resuspended in 50 mM  
169 (NH<sub>4</sub>)HCO<sub>3</sub> pH 8.0, digested overnight with sequencing-grade modified trypsin (Promega) and  
170 desalted with Zip-Tip C18 (Merck Millipore). Proteins were analyzed by nanoHPLC (EASY-nLC 1000,  
171 Thermo Scientific, Germany) coupled to a mass spectrometer with Orbitrap technology (Q-  
172 Exactive with High Collision Dissociation cell and Orbitrap analyzer, Thermo Scientific, Germany).  
173 Peptide Ionization was performed by electrospray. Data were analyzed with Proteome Discoverer  
174 2.1 software (Thermo Scientific, Germany) for identification and area quantitation of each protein.  
175 Protein identification was performed using *Acinetobacter nosocomialis* strain Ab1 protein  
176 collection as reference (UP000244598;  
177 <https://www.uniprot.org/uniprot/?query=proteome:UP000244598>) since a fully annotated *A.*  
178 *nosocomialis* RUH2624 proteome is not currently available.  
179 Missing value imputation method [24] was applied to the analyzed results, and Perseus software  
180 v1.6.1.3 (Max Planck Institute of Biochemistry) was used to perform the statistical tests. Proteins  
181 showing a fold change (FC)  $\geq 1.5$  between light and dark conditions and  $p$ -value  $< 0.05$  were  
182 considered differentially produced.

### 183 **Proteomics Bioinformatics.**

184 Biological functional analyses of differentially over-represented proteins detected by proteomic  
185 approaches were categorized according to their molecular function, biological process, and cellular  
186 component, by using the Blast2GO tool.

## 187 **Results and Discussion**

### 188 **Light modulates motility in a wide range of temperatures in *A.*** 189 ***nosocomialis* RUH2624.**

190 We have recently shown that in *A. baumannii* ATCC 17978, light modulates motility from low to  
191 moderate temperatures up to 24 °C [11]. In this work, we assayed the effect of light on motility at  
192 different temperatures in *A. nosocomialis* RUH2624. Our results show that this microorganism  
193 grows at the inoculation point under blue light at 25 °C, and despite of moving increasingly as  
194 temperature raises, it only reaches 10-20 % of plate coverage at the highest temperatures such as  
195 32 and 37 °C (Figs 1A and 1B). On the contrary, the bacteria moved covering the whole plates at all  
196 temperatures assayed in the dark (Figs 1A and 1B). Thus, in contrast to *A. baumannii*, in *A.*  
197 *nosocomialis* RUH2624 light modulates motility not only at environmental temperatures, but  
198 within a wide range of temperatures including those found in warm-blooded animals such as 37  
199 °C.

200 **Fig 1. Effects of blue light and temperature on *A. nosocomialis* motility and *anbluf65* expression.** (A) Cells  
201 of RUH2624 strain were inoculated on the surface of motility plates and incubated at the indicated  
202 temperatures. Plates were inspected and photographed after incubation in darkness (D) or in the presence  
203 of blue light (L) at the indicated temperatures. (B) Quantification of cell motility estimated as the percentage  
204 of plate coverage, i.e., the percentage of the Petri plate area covered with bacteria, in motility plates  
205 inoculated with RUH2624 wild type and incubated at the indicated temperatures. Three independent  
206 experiments were performed in each case. The area of plates covered with bacteria was measured with  
207 ImageJ (NIH), and then the percentage of plate coverage was calculated. The mean and standard deviation is  
208 informed. Different letters indicate significant differences as determined by ANOVA followed by Tukey's  
209 multiple comparison test ( $p < 0.05$ ). For those conditions at which the bacteria just reached the edge of the  
210 plate a value of 100% is informed. (C). cDNA from *A. nosocomialis* RUH2624 cells grown in motility plates in

211 the presence of blue light (L) or in darkness (D) at different temperatures was used as template for  
212 quantitative real-time PCR using *anBLUF65* specific primers. Transcription of *rpoB* was used as a  
213 constitutively expressed internal control. The results are representative of three independent experiments.  
214 The mean and standard deviation are shown. *t*-test was used to determine whether two values were  
215 significantly different comparing data within each temperature assayed. *p*-values: \*,  $p < 0.01$ ; \*\*,  $p < 0.001$ .

216

## 217 ***A. nosocomialis* RUH2624 encodes three BLUF-type putative** 218 **photoreceptors.**

219 Comparative sequence analyses have shown the presence of three BLUF domain-containing  
220 proteins encoded in the *A. nosocomialis* RUH2624 genome [8]. These putative photoreceptors  
221 received accession numbers EEW98085, EEX00046, and EEW01065 in the Genbank database and  
222 will be further referred to here as AnBLUF46, AnBLUF65 and AnBLUF85, respectively .

223 Sequence alignments of these three BLUF-domains containing proteins with other well  
224 characterized BLUF domains such as Slr1694 from *Synechocystis* sp., TII0078 from  
225 *Thermosynechococcus elongatus*, AppA and BlrB from *Rhodobacter sphaeroides*, and BlsA from *A.*  
226 *baumannii*, confirmed the presence of 22 highly conserved residues in the N-terminus of canonical  
227 BLUF domains according to pfam04940 (Fig 2A). Several BLUF domains belonging to different  
228 species from the genus *Acinetobacter* have been described so far as functional blue light  
229 photoreceptors [10-12, 15]. Alignment of these functional *Acinetobacter* BLUF-photoreceptor  
230 sequences show a higher level of conserved residues in their N-terminus domain (33 residues, Fig  
231 2B), while the analysis of all  $\gamma$ -*Proteobacteria*, including 30 *Acinetobacter* sequences deposited in  
232 pfam04940 displays lower conservation (14 residues, Fig 2C) in their primary structure and in  
233 some cases, insertions between the conserved Tyr and Gln (Fig 2A), though with a low occupancy  
234 level (Fig 2B).

235 **Fig 2. Comparative analysis of BLUF domains** (A). Multiple alignment of structurally characterized BLUF  
236 domains members of pfam04940 generated with ClustalW and adjusted with Jalview. Residues are colored  
237 according to the percentage of identity and the conservation level (darker, highly conserved). Asterisks show  
238 residues with high or very high conservation. (B) Alignment logo of *Acinetobacter* BLUFs directly or  
239 undirectly characterized as photoactives, i.e. BlsA (*A. baumannii*); AnBLUF65 (156 amino acids), AnBLUF 46  
240 (147 amino acids) and AnBLUF85 (150 amino acids); Q7BC36, Q6FAI1 and Q6FAH9 (*A. baylyi* ADP1).(C)  
241 Alignment logo performed with 341 BLUF sequences from 204  $\gamma$ - *Proteobacteria* species, obtained from  
242 PF04940 (Pfam). Asterisks show residues with high or very high conservation interacting with flavin (red) or  
243 not (black).

244

245 Phylogenetic analyses indicate that AnBLUF65 and *A. baumannii*'s BlsA BLUF domains are grouped  
246 in a monophyletic cluster [8], thus indicating that they are orthologs. *anbluf65*'s genomic context  
247 shares many features with *blsA*'s (Fig 3). *anbluf65*'s 5' upstream region is highly conserved with  
248 respect to the 5' upstream region of BlsA in *A. baumannii* ATCC 17978 (Fig 3), as well as with  
249 different strains of *A. nosocomialis* (S1 Fig). Interestingly, the presence of insertion sequence  
250 ISAb27 was detected in the intergenic region upstream of the Bof coding sequence in *A.*  
251 *nosocomialis* RUH2624 (Fig 3A and S1 Fig). Whether ISAb27 is providing a hybrid promoter or  
252 disrupting the transcription of a putative operon that includes *anbluf65* is a possibility that  
253 deserves further experimentation. *A. nosocomialis* RUH2624 *anbluf65* 3' downstream region is  
254 more variable compared both with BlsA or with other strains of *A. nosocomialis* (Fig 3 and S1 Fig).  
255 Gene *anbluf46* is located in a different genome location, surrounded by genes coding for a  
256 putative succinyl-CoA:3-ketoacid-coenzyme A transferase, a LysR transcriptional regulator, a  
257 hypothetical protein, a putative heat shock, a conjugal protein, and another hypothetical protein  
258 on the 5' upstream region (Fig 3A). On the 3' downstream region there are encoded: a putative  
259 protein with a metallo- $\beta$ -lactamase fold, an H<sup>+</sup>/gluconate symporter, a hydroxybutyrate  
260 dehydrogenase, an AraC transcriptional regulator, and an aromatic acid/H<sup>+</sup> symporter (Fig 3A).

261 *anbluf46* does not seem to be part of an operon, as both flanking genes are encoded in the  
262 opposite direction (Fig 3A). Comparing *anbluf46* genomic context in strain RUH2624 with other  
263 strains of the same species, it is observed that the 3' downstream region is highly conserved while  
264 the 5' upstream region is variable, showing the presence of transposases in different locations (S2  
265 Fig). *anbluf85* was only found encoded in *A. nosocomialis* RUH2624 and UBA873 strains (100%  
266 identity). In RUH2624, *anbluf85* is flanked by a 5' upstream region coding for an acetyltransferase  
267 and a putative conjugal transfer pilus assembly protein TraB. On the 3' downstream region there  
268 are encoded a hypothetical protein, a FAM199X domain-containing protein, and a relaxase  
269 MobA/MobL (Fig 3A). RUH2624 *anbluf85* genomic context is different from that in UBA873 (S3  
270 Fig). In the latter, only the 3' downstream region is shown as the contigs are not assembled yet (S3  
271 Fig). Sequence comparisons indicate the presence of an *anbluf85* homolog in *Acinetobacter lwoffii*  
272 strain M2a plasmid pAVAc1116 as well as in *Acinetobacter* sp. ACNIH1 plasmid pACI-148e with  
273 100% identity at nucleotide level. Interestingly, also an *anbluf85* homolog with 98.13% identity at  
274 the nucleotide level was reported to be present in *Acinetobacter baumannii* isolate KAR [25].  
275 Moreover, 100% identity homologs at the aminoacidic level are also present in *A. baumannii*  
276 strains A30, A10, and MSHR\_A189, two in *A. radioresistens* strains 50v1 and TG29429; and in *A.*  
277 *baumannii* strains MRSN7353 and ARLG1306 showing 1 aminoacidic difference with AnBLUF85.  
278 Thus *anbluf85* is not widely distributed but its presence is observed discretionally in some  
279 *Acinetobacter* species, and the possibility of horizontal gene transfer is suggested.

280 **Fig 3. Genomic context of the three BLUF photoreceptors present in *A. nosocomialis* and comparison with**  
281 **BlsA of *A. baumannii*.** (A). AnBLUF46, AnBLUF85 and AnBLUF65 genetic surroundings in *A. nosocomialis*  
282 RUH2624 strain. (B). BlsA genetic surroundings in *A. baumannii* strain ATCC 17978. Coding-sequences (CDSs)  
283 are located in their corresponding frame. The different photoreceptors are indicated as pink arrows.  
284 Different colors in CDSs indicate different functions. Gene annotations are indicated as numbers above the  
285 schemes, with the following codes: 1-DUF2171; 2-Acyl-CoA dehydrogenase; 3-GlcNAc-PI de-N-acetylase; 4-

286 Methyltransferase domain; 5-Glycosyltransferase; 6-BOF- Class 2b aminoacyl-tRNA synthetases--NirD/  
287 YgiW/YdeI family stress tolerance protein; 7-HP; 8-RhtB - Homoserine/Threonine/Homoserine Lactona  
288 translocator; 9-AraC transcriptional regulator; 10- Poly(R)-hydroxyalkanoic acid synthase; 11-GltS-  
289 Sodium/glutamate symporter; 12- DUF815; 13-FdaR- Fatty acid transcriptional regulator; 14-DDE  
290 endonuclease domain, putative transposase; 15-Helix-turn-helix of DDE superfamily endonuclease; 16-  
291 Proton antiporter-2 (CPA2) family; 17-NDAB-Rossmann Superfamily- Oxidoreductase; 18-DoxX-like family;  
292 19-Succinyl-CoA:3-ketoacid-coenzyme A transferase subunit B; 20-Succinyl-CoA:3-ketoacid-coenzyme A  
293 transferase subunit A; 21-LysR family transcriptional regulator; 22- HP; 23-DUF3298-Putative heat-shock  
294 protein; 24-DUF2846-Putative conjugal domain; 25-HP; 26-MBL fold metallo-hydrolase; 27-H<sup>+</sup>/gluconate  
295 symporter; 28-3-Hydroxybutyrate dehydrogenase; 29-AraC family transcriptional regulator-RmlC-cupin  
296 protein; 30-Aromatic acid:H<sup>+</sup> symporter (AAHS); 31-Conjugal transfer pilus assembly protein TraB; 32-N-  
297 Acetyltransferase; 33-HP; 34-FAM199X; 35-Relaxase-MobA/MobL family protein. HP: hypothetical protein.  
298

## 299 **Only AnBLUF65 and AnBLUF46 are stable photoreceptors.**

300 We evaluated next whether the three BLUF-domain containing genes encode active  
301 photoreceptors. For this purpose, genes *anbluf65*, *anbluf46* and *anbluf85* were recombinantly  
302 expressed and purified to assess their functionality.

303 Fig 4 shows the UV-vis spectra of AnBLUF65 (92% identity with BlsA) and AnBLUF46 (45% identity  
304 with BlsA) at 15 °C in working buffer. Before blue light irradiation, both dark-adapted states of  
305 AnBLUF65 (d-AnBLUF65) and AnBLUF46 (d-AnBLUF46) showed the typical absorption band of the  
306 fully oxidized flavin corresponding to the transition  $S_0 \rightarrow S_1$  with  $\lambda_{\max} \approx 460$  nm and shoulder  
307 approximately at 483 nm. Upon blue-LED illumination, the band is red-shifted, characteristic of the  
308 formation of the light-adapted state of BLUF proteins (l-BLUF) [26], with absorption maximum  
309 wavelength shift of 8 and 12 nm for l-AnBLUF65 and l-AnBLUF46, respectively (Fig 4A and C). The  
310 differential absorption spectrum ( $\Delta A$ ) between the light- and dark-adapted states of AnBLUF65

311 showed positive changes at 508 and 472 nm, and negative changes at 455 and 427 nm. AnBLUF46  
312 also showed positive changes at 511 and 476 nm, whereas negative bands were less defined  
313 (insets Fig 4A and C). The overall results indicate that AnBLUF65 and AnBLUF46 are active  
314 photoreceptors. Gene *anbluf85* was weakly expressed and the partially purified product was  
315 barely stable precipitating at T higher than 12 °C, with a photocycle presenting a  $\approx 7$  nm red shift  
316 (S4 Fig).

317 **Fig 4. Normalized steady-state visible absorption-emission spectra changes of photoreceptors by blue**  
318 **light illumination**, in working buffer solution at 15 °C. (A and B). dAnBLUF65 (black line) and lAnBLUF 65  
319 (blue line). (C and D). dAnBLUF46 (black line) and lAnBLUF46 (red line). Inset: differential absorption spectra  
320 (lAnBLUF-dAnBLUF).

321

322 Fluorescence emission spectra obtained by excitation at 460 nm at 15 °C for d-AnBLUF65 and d-  
323 AnBLUF46 also depicted a BLUF-like behavior, with an emission maximum at 512 and 519 nm,  
324 respectively (Fig 4B and D). The fluorescence bands of both proteins were blue-shifted compared  
325 with free FAD in the same working buffer [10, 11] confirming the existence of specific interactions  
326 between the isoalloxazine group of the flavin with the surrounding residues, and reducing solvent  
327 accessibility within the flavin binding pocket [27]. When the fluorescence spectrum of the light-  
328 adapted and the dark-adapted forms of both photoreceptors were compared, they exhibited the  
329 typical red shift of approximately 5 nm of the fluorescence maximum in addition to a loss of  
330 vibratory structure and a lower emission intensity, suggesting a more relaxed environment around  
331 the cofactor [28-30] [10].

332 **Only *anbluf1065* is expressed in *A. nosocomialis* RUH2624.**

333 The expression levels of the three BLUF-type photoreceptors encoded in *A. nosocomialis* RUH2624  
334 were analyzed on cells recovered from motility plates incubated at a wide range of temperatures  
335 (25–35 °C) under blue light or in the dark by qRT-PCR as described previously [14]. We were able

336 to detect expression of *anbluf1065* only, the *blsA* ortholog in *A. nosocomialis* [8]. *anbluf65* was  
337 expressed at 25, 30, and 35 °C, with approximately 9, 8, and 7.5-fold higher expression in the dark  
338 than under blue light (Fig 1C); a response previously observed for BlsA [11, 15]. Moreover,  
339 expression levels were higher at lower temperatures (Fig 1C). Thus, our results suggest that  
340 expression of the putative *anbluf65* photoreceptor correlates with regulation of motility by light.

341 **AnBLUF65's photoreceptor activity is operative in a temperature**  
342 **range that correlates with regulation of motility by light.**

343 *A. nosocomialis* modulates motility in response to blue light in a similar fashion as observed for *A.*  
344 *baumannii*, but in a wider range of temperatures. Table 2 summarizes the temperature  
345 dependency of visible absorption and emission fluorescent properties of flavin in purified  
346 AnBLU65 and AnBLUF46 photoreceptors. Absorption maxima of the dark-adapted forms of both  
347 proteins were blue-shifted when temperature increased, reaching in the case of d-AnBLUF46 the  
348 value of free FAD in solution ( $\approx 450$  nm). The ratio between the shoulder absorbance at  $\approx 480$  nm  
349 and the absorption maximum ( $A_{sh}/A_{max}$ ) diminished with temperature increments, as did the  
350 redshift upon blue light illumination, suggesting a distancing between the conserved Tyr to the  
351 isoalloxazine ring [31]. Fluorescence emission properties of the cofactor were significantly affected  
352 upon formation of l-AnBLUF65 at 24 and 37 °C, with a redshift in response to blue light, as  
353 described before at 15 °C or when temperature increased, implying a relaxation in the hydrogen  
354 bond network surrounding the isoalloxazine, and/or changes in the polarity in the chromophore  
355 cavity as a consequence of increased solvent accessibility. Widening of the emission spectrum full-  
356 width half-maximum (FWHM) in response to the formation of the light-adapted state for  
357 AnBLUF65 was observed at 24 and 37 °C, and this effect was also evident when temperature  
358 increased. Overall, these results indicate that the flavin environment in AnBLUF65 is affected by  
359 temperature, as it has been shown for BlsA [10, 11]. In contrast, emission maximum wavelength



360 and FWHM for the dark- or the light-adapted states of AnBLUF46 did not show significant changes  
 361 neither in response to blue light at 24 and 32 °C, nor to temperature increments. In fact, d- and l-  
 362 AnBLUF46 isoalloxazine pockets appeared to be more polar than the same states of AnBLUF65.  
 363 Chromophore environments in AnBLUF65 and AnBLUF46 were somewhat dissimilar and appeared  
 364 to react in a different way to the formation of the light-adapted state. This fact goes in good  
 365 agreement with structural predictions from models of these two proteins generated using the  
 366 crystallographic structure of dark- and light-adapted states of BlsA (PDBs 6W6Z and 6W72,  
 367 respectively) as templates (Fig 5). Fig 5A and 5B show the location of water molecules (blue dots)  
 368 for the dark-adapted form of BlsA (d-BlsA) and the light-adapted (l-BlsA) respectively, determined  
 369 by Chitrakar *et al.* [32]. The flavin pocket access site has more affinity and/or accessibility to water  
 370 molecules in the light-adapted form, supporting our previous characterization of chromophore  
 371 behavior inside BlsA cavity by the flavin fluorescence emission (Fig 5A and B)[10]. Modeled  
 372 structures of AnBLUF65 (Fig 5C and 5D), which is BlsA ortholog as described before, show that the  
 373 environment of the cofactor is conserved compared with BlsA. This means that analogously to  
 374 BlsA, the flavin pocket in the light-adapted form of AnBLUF65 is more solvent-accessible. In  
 375 contrast, the solvent accessibility to the chromophore cavity between d- and l-AnBLUF46 is  
 376 indistinguishable (Fig 5E and F). In addition, the flavin binding site in AnBLUF46 seems more  
 377 solvent-accessible than in BlsA/AnBLUF65. Hence, these data stress out how temperature and blue  
 378 light differentially affect them.

379 **Table 2.** Absorption-emission properties of AnBLUF46 and AnBLUF65 at different temperatures.

|                 | T<br>(°C) | Absorption       |                                |            | Emission         |              |                  |              |
|-----------------|-----------|------------------|--------------------------------|------------|------------------|--------------|------------------|--------------|
|                 |           | $\lambda_{\max}$ | $A_{\text{sh}}/A_{\text{max}}$ | $\Delta A$ | $\lambda_{\max}$ | d-AnBLUF     | $\lambda_{\max}$ | l-AnBLUF     |
|                 |           | d-AnBLUF<br>(nm) | d-AnBLUF                       | (a.u)      | d-AnBLUF<br>(nm) | FWHM<br>(nm) | l-BLUF<br>(nm)   | FWHM<br>(nm) |
| <b>AnBLUF65</b> | 15        | 460              | 0.86                           | 8          | 512              | 64           | 517              | 74           |

|                 |    |     |      |    |     |    |     |    |
|-----------------|----|-----|------|----|-----|----|-----|----|
|                 | 24 | 459 | 0.87 | 6  | 514 | 65 | 519 | 74 |
|                 | 37 | 457 | 0.79 | 3  | 520 | 74 | 523 | 76 |
| <b>AnBLUF46</b> | 15 | 459 | 0.81 | 13 | 519 | 68 | 522 | 68 |
|                 | 24 | 457 | 0.81 | 13 | 523 | 75 | 523 | 75 |
|                 | 32 | 450 | 0.72 | 8  | 523 | 75 | 523 | 76 |

380 Maximum absorption wavelength ( $\lambda_{\max}$ ), shoulder to maximum absorbance ratio ( $A_{\text{sh}}/A_{\max}$ ), redshift  
 381 maximum upon BL illumination ( $\Delta A$ ), maximum emission wavelength ( $\lambda_{\text{max}}$ ) and full-width at half maximum  
 382 (FWHM) for dark and light-adapted proteins.

383 **Fig 5. Surface representation of *Acinetobacter* BLUFs and FMN (yellow sticks) into the site access pocket.**

384 Internal surface associated with the cavity is also depicted. (A) BlsA dark-adapted, PDB 6W6Z; (B) BlsA light-  
 385 adapted, PDB 6W72, (C) d-AnBLUF65; (D) l-AnBLUF65; (E) d-AnBLUF46 and (F) l-AnBLUF46.- Models were  
 386 generated with the Swiss-Model server, using PDB 6W6Z as template for figure C and E and PDB 6W72 for  
 387 figure D and F. Water molecules are depicted as blue dots.

388

389 Insets in Fig 4 show difference spectra both for AnBLUF65 and AnBLUF46 (lAnBLUF-dAnBLUF). In  
 390 previous work, we have used the  $\Delta A$  at 510 nm at different temperatures to follow the kinetics of  
 391 formation of the light-adapted state of each protein, and in darkness, the recovery time back to  
 392 the dark-adapted state, through cycles of blue light illumination. This kinetic profile was used to  
 393 determine the quantum yield of the protein light-adapted formation,  $\Phi_{\text{lAnBLUF}}$ . Fig 6 presents the  
 394 kinetic profiles of AnBLUF65 (Figures 6A and 6B) and AnBLUF46 (Fig 6C and 6D) tested at two  
 395 temperatures. For AnBLUF65 the kinetic curves were monitored at 24 °C and 37 °C, which  
 396 correspond to environmental and warm-blooded host temperatures, respectively. However,  
 397 AnBLUF46 was tested at 24 °C and 32 °C, the maximum temperature at which this photoreceptor  
 398 presented activity. Table 3 summarizes the light-adapted-state formation time  $\tau_{\text{lAnBLUF}}$  and the  
 399 recovery time back to the dark-adapted state  $\tau_{\text{rec}}$  for both BLUFs as a function of temperature  
 400 along with the photoactivation quantum yield of light-adapted state,  $\Phi_{\text{lAnBLUF}}$ .

401 **Table 3.** Kinetic parameters observed for AnBLUF65, AnBLUF46, and BlsA at 24 °C and 37 °C.

|                 | Temperature<br>( °C) | $\tau_{I\text{-BLUF}}$<br>(s) | $\Phi_{I\text{-BLUF}}$ | $\tau_{\text{rec}}$<br>(s) |
|-----------------|----------------------|-------------------------------|------------------------|----------------------------|
| <b>AnBLUF65</b> | 24                   | 106±8                         | 0.36±0.04              | 233±8                      |
|                 | 37                   | 80±15                         | 0.12±0.03              | 240±60                     |
| <b>AnBLUF46</b> | 24                   | 70±4                          | 0.11±0.01              | 950±90                     |
|                 | 32                   | 40±5                          | 0.08±0.02              | 115±20                     |
|                 | 37                   | ND                            | ND                     | ND                         |
| <b>BlsA*</b>    | 24                   | 70±2                          | 0.17±0.01              | 111±10                     |
|                 | 26                   | 28±9                          | 0.11±0.02              | 40±9                       |
|                 | 37                   | ND                            | ND                     | ND                         |

402 ND: not detectable. \* [11]

403 **Fig 6. Kinetic profile of absorbance changes at 510 nm.** (A and B) AnBLUF65 at 24 and 37 °C. (C and D)

404 AnBLUF46 at 24 and 32 °C. Dark adapted protein, dAnBLUF was illuminated using blue light LED at 443 ± 20  
405 nm (blue arrows). After maximal conversion to IAnBLUF, blue light was turned off (black arrow) and protein  
406 back to dAnBLUF.

407

408 Temperature increments had a significant effect on the  $\tau_{I\text{AnBLUF}}$  for both proteins, with reductions  
409 of 25 and 40% for  $\tau_{I\text{AnBLUF65}}$  and  $\tau_{I\text{AnBLUF46}}$ , respectively. AnBLUF46 had similar values to BlsA at 24 °C  
410 (Table 3), however,  $\tau_{I\text{AnBLUF65}}$  was larger than that of BlsA. Analyses of  $\tau_{\text{rec}}$  show that AnBLUF46  
411 takes 15 mins to recover, nine times slower than BlsA; while AnBLUF65 was only two-fold slower  
412 than the *A. baumannii* protein. As expected for a thermal process,  $\tau_{\text{recAnBLUF46}}$  was nine times faster  
413 when temperature increased to 32 °C, becoming similar to the value of  $\tau_{\text{recBlsA}}$  at 24 °C. However,  
414 this was not the case of AnBLUF65, whose  $\tau_{\text{recAnBLUF65}}$  remained constant at 24 and 37 °C. This  
415 behavior prompts us to speculate whether this recovery time might have some physiological  
416 meaning since AnBLUF65 presents conformational changes at least in its binding cavity upon  
417 illumination, but the time to return to the dark form is conserved.

418 Despite the high sequence similarity between AnBLUF65 and BlsA (92%), the behavior of the  
419 former was significantly different compared with that of the latter, regarding the efficiency to  
420 respond to blue light generating the light-adapted form. In fact,  $\Phi_{\text{AnBLUF65}}$  was more than two-fold  
421 higher than that of BlsA at 24 °C, which can be interpreted as AnBLUF65 being more efficient to  
422 form the light-adapted state. The  $\tau_{\text{AnBLUF65}}$  was also significantly higher than that for BlsA, although  
423 to a lesser extent, and the  $\tau_{\text{recAnBLUF65}}$  was two-fold higher than  $\tau_{\text{recBlsA}}$ , probably because the  
424 adapted form is more stabilized in AnBLUF65 than in BlsA. Another contrasting effect between  
425 such similar proteins is that AnBLUF65 is less prone to aggregate upon temperature increments  
426 than BlsA, which shows this effect macroscopically above 30 °C, while AnBLUF65 does not  
427 aggregate at 37 °C showing only incipient turbidity in the buffer solution. While  $\Phi_{\text{BlsA}}$  reaches non-  
428 detectable values at T higher than 28 °C,  $\Phi_{\text{AnBLUF65}}$  at 37 °C is  $0.12 \pm 0.03$ . In contrast,  $\Phi_{\text{AnBLUF46}}$  was  
429 not significantly impacted between 24 °C and 32 °C. Nevertheless, AnBLUF46 lost all photoactivity  
430 at  $T > 32$  °C. These results suggest that AnBLUF65 is more efficient to form the light-adapted state  
431 than AnBLUF46 at 24 °C.

## 432 **Intramolecular interactions and their role in intra-protein** 433 **signaling.**

434 So far, we have analyzed these photoreceptors describing intrinsic phenomena occurring mostly in  
435 the N-terminal side of the protein, where the flavin resides in its cavity. These data have profiled  
436 AnBLUF65 and AnBLUF46 in the first part of the photo-reception process. Next, we aimed to  
437 expand our analyses to cover the subtle structural rearrangements between the dark and the  
438 light-adapted states of the protein. Intra-protein changes in hydrophobic and aromatic residue  
439 interactions driven upon illumination have been suggested by Chitrakar et al, 2020 to explain how  
440 the photo-signal might be translated from the flavin surroundings to the variable domain. Based  
441 on the similarity between BlsA and AnBLUF65, we modeled structures for both *A. nosocomialis*

442 proteins, AnBLUF65 and AnBLUF46 (Fig 5), using BlsA as template, which is appropriate since  
443 BLUF's in *Acinetobacter* genus share high sequence similarity. We used RING 2.0 [23] to profile all  
444 intramolecular interactions, such as  $\pi$ - $\pi$  stacking, H-bonding, Van der Waals (VDW) interactions,  
445 and salt bridges, in AnBLUF65 and AnBLUF46, as presented in S1 Table. The analysis of  $\pi$ - $\pi$  stacking  
446 interactions amongst aromatic residues helped us to profile aromatic networks for both proteins,  
447 in both dark- and light-adapted forms.

448 The first aromatic cluster found surrounds the flavin cofactor and involves the hydrophobic side of  
449 the isoalloxazine ring (ring I), the conserved Tyr, a Phe and a His for AnBLUF65 as shown in Fig 7.  
450 This His belongs to the already described motif Asp-X-Arg-His and it has been suggested that the  
451 protonation/deprotonation of the conserved Gln via His is energetically favourable [33]. In  
452 AnBLUF65, His73 forms  $\pi$ - $\pi$  stacks with Tyr7 and with Phe49 in addition to other interactions i.e.  
453 H-bonds that have been described before. After blue light illumination this cluster does not show a  
454 significant impact on its C $\alpha$  main chain or in the angle of the aromatics involved. This might be  
455 necessary to conserve the hydrophobicity in the flavin pocket [34].

456 **Fig 7. Residues involved in  $\pi$ - $\pi$  stacking interactions in AnBLUF65** dark-(orange) and light-adapted (blue)  
457 state.

458

459 The next aromatic network found is in the variable domain (C-terminal) and contains two aromatic  
460 tetrads, that are formed by six Phe in AnBLUF65 (Fig 7). Upon blue light illumination, distances  
461 between aromatic centroids in these tetrads are shortened in all cases in AnBLUF65. Phe106 loses  
462 its  $\pi$ - $\pi$  stack interaction with Phe115, being left only with VDW interactions. Thus, the formation  
463 of the light adapted state of AnBLUF65 requires a local re-arrangement of  $\alpha$ -helices in the C-  
464 terminal and the aromatic network in this area is strengthened.

465 A Tyr-Tyr motif, highly conserved in *Acinetobacter* BLUFs (Fig 2B) also participates in the aromatic  
466 networks described before. AnBLUF65 has Tyr44 interacting with Phe49 on the chromophore side

467 of the protein, while Tyr43 interacts through  $\pi$ - $\pi$  stacking with Phe128 on the other side of the  $\beta$ -  
468 sheet, towards the variable domain (Fig 7). The notable re-arrangement is found towards the  
469 variable domain may be possible because an Asp residue located in the loop between the Tyr-Tyr  
470 motif and the first Phe-Phe motif, rotates upon blue light illumination, losing its contact with  
471 Phe115. Thus, one way to explain these findings is that the aromatic clusters found in the variable  
472 domain might internally stabilize the structure of this protein upon the formation of the light-  
473 adapted state. In contrast, the aromatic cluster in the flavin/N-terminal side of these proteins does  
474 not suffer any alteration when changing states. Taken together, it suggests that intramolecular  
475 hydrophobic/aromatic interactions might have a role in the elasticity of the protein monomer to  
476 go back and forth between the two states.

## 477 **Quantitative differential proteomic profiling in response to light in**

### 478 ***A. nosocomialis* RUH2624 at 37 °C.**

479 In previous studies, we demonstrated that light can modulate important physiological traits  
480 related to bacterial physiology and virulence in *A. baumannii*, *S. aureus*, *P. aeruginosa* and *A.*  
481 *nosocomialis* at temperatures found in warm-blooded hosts [8, 9, 14, 15, 17, 18, 35]. To broaden  
482 our knowledge of the response to light in *A. nosocomialis* at 37 °C, a quantitative comparative  
483 proteomic analysis was conducted to obtain an overall representation of the total cellular changes  
484 that occur in RUH2624 cells at the protein level upon blue light illumination at the mentioned  
485 temperature. We aimed to use proteomics as a tool to identify those proteins that could be  
486 present in different amounts under light and dark conditions and how these proteins could affect  
487 *A. nosocomialis*' physiology.

488 In total, 38 proteins were over-represented (fold change (FC) > 1.5 and *p-value* < 0.05, see Tables 4  
489 and 5) when cells were grown under blue light or dark state at 37 °C (Fig 8A). Twenty proteins  
490 were accumulated in higher amounts in cells cultured under blue light with respect to darkness

491 (Fig 8A and B), while eighteen proteins were found to be in a greater amount under dark state (Fig  
 492 8A and C). When categorized using BLAST2GO suite, these proteins were dispersed across a wide  
 493 variety of functions, according to gene ontology terms (Fig 9). In the “Biological Process” and  
 494 “Molecular Function” sections the majority of the over-represented proteins fell into the  
 495 metabolic/cellular process and catalytic activity categories, respectively, indicating changes in the  
 496 metabolism of this bacterium in response to light. Considering “Cellular Component”, over-  
 497 represented proteins under light conditions appear mainly distributed in the plasma and outer  
 498 membranes, while in darkness most of them are cytoplasmatic (Tables 4 and 5).

499 **Table 4.** Proteins with increased abundance in the light compared to dark at 37 °C.

| Accession Number | Description                                               | p-value  | FC   |
|------------------|-----------------------------------------------------------|----------|------|
| FA0A2T7FSK9      | Probable allantoinase                                     | 2.82E-05 | 62.0 |
| K9B4X7           | Thiol disulfide reductase thioredoxin                     | 4.79E-02 | 32.1 |
| A0A2T7FKW8       | TonB-dependent receptor                                   | 1.29E-02 | 27.4 |
| A0A2T7FJ60       | Glutathione S-transferase                                 | 1.48E-02 | 24.0 |
| A0A0A7XMP5       | DUF4442 domain-containing protein                         | 3.98E-04 | 18.1 |
| A0A2T7FKT5       | Aldehyde dehydrogenase                                    | 2.69E-05 | 10.5 |
| A0A2T7FHA5       | Peptidylprolyl isomerase (Fragment)                       | 2.95E-02 | 10.3 |
| A0A0A7XME6       | Biopolymer transporter ExbD OS=Acinetobacter nosocomialis | 1.15E-05 | 9.3  |
| A0A2T7FQW1       | NAD(P)/FAD-dependent oxidoreductase                       | 4.68E-02 | 4.8  |
| K9C8I9           | Methyltransferase                                         | 2.63E-03 | 4.1  |
| A0A2T7FR20       | Queuine tRNA-ribosyltransferase                           | 9.55E-03 | 2.8  |
| A0A2T7FM31       | Acetyl-CoA C-acetyltransferase                            | 9.33E-03 | 1.9  |
| K9BUJ6           | 1-acyl-sn-glycerol-3-phosphate acyltransferase            | 4.07E-02 | 1.7  |
| A0A0Q1LRF3       | DnaA regulatory inactivator Hda                           | 1.48E-02 | 1.6  |
| K9BNN6           | 3-isopropylmalate dehydratase small subunit               | 4.37E-03 | 1.6  |
| A0A2T7FS76       | Inorganic triphosphatase                                  | 1.74E-02 | 1.6  |
| A0A0R0WRI3       | Heme-binding protein                                      | 3.02E-02 | 1.6  |
| A0A2T7FQL7       | Phosphoribosylamine--glycine ligase                       | 4.90E-02 | 1.5  |
| A0A2T7FKA3       | Gamma-glutamyl phosphate reductase                        | 3.09E-02 | 1.5  |
| A0A2T7FKU3       | Ribosomal RNA large subunit methyltransferase K/L         | 4.37E-02 | 1.5  |

500

501 **Table 5.** Proteins with increased abundance in dark compared to light at 37 °C

| Accession Number | Description                               | p-value  | FC  |
|------------------|-------------------------------------------|----------|-----|
| A0A2T7FRV8       | UDP-N-acetylglucosamine 2-epimerase (Non- | 2.75E-02 | 1.7 |

|            | hydrolyzing)                                       |          |      |
|------------|----------------------------------------------------|----------|------|
| A0A2T7FJB8 | Phenylacetate-CoA oxygenase/reductase subunit PaaK | 3.80E-02 | 1.7  |
| A0A2T7FI74 | S-(hydroxymethyl)glutathione dehydrogenase         | 2.34E-02 | 1.8  |
| A0A0R1BYG0 | 50S ribosomal protein L30                          | 5.37E-03 | 1.9  |
| A0A2T7FPU2 | Imidazolonepropionase                              | 1.12E-02 | 2.5  |
| A0A2T7FP64 | Uncharacterized protein                            | 1.02E-02 | 3.0  |
| A0A2T7FQH8 | 3-hydroxy-2-methylbutyryl-CoA dehydrogenase        | 3.24E-02 | 3.1  |
| K9AWZ8     | Endopeptidase La                                   | 6.61E-03 | 6.1  |
| A0A2T7FKJ2 | Ribonuclease H                                     | 1.15E-03 | 8.7  |
| A0A2T7FJC4 | Ligand-gated channel protein                       | 3.02E-02 | 10.0 |
| A0A2T7FPJ6 | ABC transporter ATP-binding protein                | 7.59E-05 | 15.4 |
| A0A2L1VLW9 | Probable potassium transport system protein kup    | 3.24E-02 | 21.3 |
| A0A2T7FHT8 | DNA-directed DNA polymerase                        | 7.24E-03 | 21.4 |
| A0A2T7FRB2 | CoA transferase                                    | 3.55E-03 | 23.4 |
| K9BAG9     | Chromosome partitioning protein ParA               | 3.47E-03 | 31.0 |
| A0A0A7XIC2 | DUF541 domain-containing protein                   | 1.70E-05 | 47.0 |
| K9ATF3     | Peptidase S41                                      | 1.12E-02 | 49.3 |
| A0A2T7FS51 | Aminopeptidase                                     | 9.12E-14 | 77.9 |

502

503 **Fig 8. Comparison of over-represented proteins detected by nanoHPLC under light and dark conditions for**

504 ***A. nosocomialis* RUH2624.** (A) Scatter plot. (B) Heatmap of proteins produced in higher amounts under blue

505 light. (C) Heatmap of proteins produced in higher amounts under dark condition.

506 **Fig 9. Gene ontology categories after Blast2Go analysis of all differential produced proteins. L and D**

507 correspond to over-represented proteins under light and dark conditions, respectively, for *A. nosocomialis*

508 RUH2624.

509

### 510 **Proteins with increased abundance in light compared to darkness.**

511 Light regulates the synthesis of proteins involved in a wide range of cellular functions. As

512 mentioned before, these differentially over-represented proteins include some playing roles in

513 metabolism, stress responses, and virulence in different bacterial pathogens.

514 Two proteins, PurD and Alc, related to purine metabolism were over-represented ( $FC_{PurD} = 1.50$ ,

515  $FC_{Alc} = 63.0$ ) in the presence of blue light. PurD is a phosphoribosylamine-glycine ligase and

516 participates in the synthesis of inosine 5'-monophosphate (IMP) [36]. Purine metabolism plays an

517 important role in microorganisms, recycling carbon and nitrogen compounds and regulating



518 metabolism [37]. Several previous reports have described the importance of nucleotide  
519 biosynthesis by bacteria triggering infections. For instance, certain auxotroph mutants of  
520 *Salmonella*, *S. aureus*, or *S. pneumoniae* were avirulent in murine infection models [38, 39].  
521 Besides, other studies demonstrate that limiting amounts of nucleotide bases in human serum,  
522 force pathogens to rely on *de novo* nucleotide biosynthesis [40].

523 Alc, which encodes an allantoicase, is involved in (S)-allantoin degradation and catalyzes the  
524 conversion of allantoate to (S)-ureidoglycolate and urea. Previous studies have found that nitrogen  
525 controls several pathways involved in secondary metabolism [41]. In general, secondary  
526 metabolites are produced by the cells as a response to environmental cues. For example, a  
527 notable decrease in antibiotic production was observed in *S. coelicolor* M145 as a response to the  
528 excess of intracellular ammonium generated during degradation of allantoin when the  
529 microorganism was grown in allantoin as the sole nitrogen source [42].

530 Regarding proteins involved in amino acids biosynthesis, LeuD and ProA are present in higher  
531 amounts in the presence of blue light ( $FC_{LeuD} = 1.62$ ,  $FC_{ProA} = 1.50$ ). LeuD catalyzes the isomerization  
532 between 2-isopropylmalate and 3-isopropylmalate, and is part of L-leucine biosynthesis [43].

533 ProA (gamma-glutamyl phosphate reductase protein) participates in step 2 of the subpathway that  
534 synthesizes L-glutamate-5-semialdehyde from L-glutamate and is involved in L-proline biosynthesis  
535 [44]. There are shreds of evidence that proline metabolism has complex roles in a variety of  
536 biological processes, including cell signaling, stress protection, and energy production [45]. Proline  
537 can also contribute to the pathogenesis of various disease-causing organisms. Besides, some  
538 organisms use proline directly for the biosynthesis of secondary metabolites with antibacterial or  
539 antifungal properties [46].

540 An interesting protein that is over-represented in the light state is SurA, a chaperone involved in  
541 the correct folding and assembly of outer membrane proteins (OMPs), and may act both in early  
542 periplasmic as well as in late outer membrane-associated steps of protein maturation [47]. A great

543 variety of outer membrane proteins are porins and autotransporters that facilitate transport and  
544 other essential functions, and act as virulence factors [48]. In *P. aeruginosa*, a significantly lower  
545 amount of many porins were detected in the outer membrane (OM) of the conditional *surA*  
546 mutant, including members of the OprD family (OprO, OprN, OprP, and OprD) [49]. Also, it was  
547 found that siderophore receptors were absent or less abundant in the OM upon depletion of SurA  
548 [49]. Related to this point, in the present work a TonB-dependent receptor and a biopolymer  
549 transporter ExbD, which are part of a complex that energizes specific high-affinity receptors  
550 involved in regulating iron uptake, were found in a greater amount under blue light ( $FC_{\text{TonB}}= 27.35$ ,  
551  $FC_{\text{ExbD}}= 9.27$ ). Consistently, a more robust growth under iron-deprived conditions, i.e., in the  
552 presence of the iron chelator 2,2'-dipyridyl (DIP), was observed in *A. nosocomialis* under blue light  
553 at 37 °C while it was severely affected in the dark [9]. Therefore, the higher abundance of SurA,  
554 TonB-dependent receptor, and ExbD under blue light could contribute to the enhanced iron  
555 acquisition observed in this condition, and this is an important feature since iron is a pathogenicity  
556 determinant essential for the success of bacterial infections [50].

557 Other proteins such as queuine tRNA-ribosyltransferase (Tgt) and ribosomal RNA large subunit  
558 methyltransferase K/L (RlmL) showed an increase in abundance under blue light. Tgt catalyzes the  
559 exchange of a guanine 34 with the queuine precursor 7-aminomethyl-7-deazaguanine (PreQ1) in  
560 specific tRNAs containing anticodones G(guanine)-U(uracil)-N (tRNA-Asp, -Asn, -His and -Tyr),  
561 where N is one of the four canonical nucleotides [51]. It was shown that a functional Tgt is  
562 required for efficient pathogenicity of *Shigella* bacteria [52]. A null-mutation in the *tgt* gene  
563 strongly reduces translation of *virF*-mRNA, a transcriptional activator required for the expression  
564 of a large number of *Shigella* pathogenicity genes [53]. On the other hand, RlmL K/L specifically  
565 methylates the guanine in position 2445 and the guanine in position 2069 (m7G2069) of 23S rRNA.  
566 The rRNA methyltransferases (rRNA MTases), especially those acting on 23S rRNA, are associated  
567 with development of antibiotic resistance in a wide variety of bacteria, and some of them are

568 recurrent human pathogens [54]. Inactivation of 23S rRNA MTases function has been shown to  
569 affect negatively translation and cell physiology [55].

570 Finally, a glutathione S-transferase was over-represented in the light condition. The glutathione S-  
571 transferases (GSTs) are a family of proteins that conjugate glutathione to the sulfur atom of  
572 cysteine in various compounds [56]. GST can bind to a variety of hydrophobic compounds  
573 endogenous and xenobiotic alkylating agents with high affinity, including carcinogens, therapeutic  
574 drugs, environmental toxins and products of oxidative stress, protecting cells from oxidative  
575 damage [57].

576 Taken together, these observations suggest that light could play a main role in the control of *A.*  
577 *nosocomialis* physiology at 37 °C, particularly modulating pathogenesis and allowing cells to  
578 respond and adapt to environmental signals.

### 579 **Proteins with increased abundance in the dark compared to light.**

580 Among the proteins with higher abundance in the dark is present the phenylacetate-CoA  
581 oxygenase, PaaK subunit. Phenylacetate-CoA oxygenase is comprised of a complex composed of 5  
582 proteins responsible for the hydroxylation of phenylacetate-CoA (PA-CoA), which is the second  
583 catabolic step in phenylacetic acid (PAA) degradation [58]. Interestingly, we have shown that *A.*  
584 *nosocomialis* RUH2624 growth is stimulated in the dark when PAA is present as the sole carbon  
585 source at 37 °C [9], supporting the notion that the PAA catabolic pathway is modulated by light.  
586 Modulation of the PAA catabolic pathway has been shown to influence *A. baumannii*'s  
587 pathogenesis. In fact, inhibition of this pathway resulted in increased neutrophil migration to the  
588 site of infection and bacterial clearance [58] [59].

589 Another protein that appears over-represented in the dark is the nonhydrolyzing UDP-N-  
590 acetylglucosamine 2-epimerase (FC= 1.7). This enzyme catalyzes the reversible interconversion of  
591 UDP-N-acetylglucosamine (UDP-GlcNAc) to UDP-N-acetylmannosamine (UDP-ManNAc) [60], being

592 this compound an intermediate in the biosynthesis of a variety of bacterial capsular  
593 polysaccharides (CPSs) [61]. In several pathogenic strains, such as *B. anthracis*, *N. meningitides* and  
594 *S. aureus*, CPSs are important virulence factors that protects bacteria from the immune system of  
595 a host and harsh environmental conditions [62-64]. In this sense, the UDP-N-acetylglucosamine 2-  
596 epimerase could contribute to cell-surface polysaccharide synthesis in *A. nosocomialis*, protecting  
597 the cells in the absence of light. The probable potassium transport Kup protein, found in a greater  
598 quantity in dark, could also favor the adaptation to rapidly changing external conditions.

599

## 600 Conclusion

601 In this work, we show that light regulates motility in *A. nosocomialis* in a wide range of  
602 temperatures, which go from environmental to temperatures found in warm-blooded hosts (23 to  
603 37 °C). This temperature dependence is different from that observed for regulation of motility by  
604 light in *A. baumannii* ATCC 17978, which was shown to occur only in the low to environmental  
605 temperature range (18 to 24 °C). We hypothesized that this could be due to an unequal  
606 endowment of *blsA* homologs, whose intrinsic characteristics may allow them to function in other  
607 temperature ranges. In this work, we show that the three BLUF domain-containing genes present  
608 in the *A. nosocomialis* RUH2624 genome [8], encode active photoreceptors. But only two of them,  
609 AnBLUF65 and AnBLUF46 are stable proteins when produced *in vitro* in the temperature range  
610 analyzed: (15-37 °C) and (15-32 °C), respectively. The fact that AnBLUF65 is the only of the three  
611 BLUF domain-containing proteins that is expressed *in vivo* along with the photo-regulatory  
612 temperature range, strongly suggests that it participates in the modulation of motility by light.  
613 Spectroscopic characterizations of AnBLUF65 and AnBLUF46 *in vitro*, indicate that AnBLUF65 is  
614 more efficient to form the light-adapted state than AnBLUF46 at 24 °C. And although AnBLUF65  
615 efficiency is negatively affected by temperature increments, the protein remains active at 37 °C,  
616 accordingly with being the only blue light photoreceptor expressed in *A. nosocomialis*. 3D models  
617 of these proteins were presented and discussed. The relative solvent accessibility to the cofactor  
618 pocket derived from flavin emission fluorescence correlates well with the tertiary structure  
619 modeled for both proteins and both states, dark and light-adapted. We have additionally  
620 characterized intramolecular interactions to profile the underlying phenomena upon formation of  
621 the light-adapted state. The presence of aromatic clusters networks on either side of the  $\beta$ -sheet  
622 has been described. We propose that the rupture of an Asp-X interaction via H-bonding observed  
623 upon illumination in the loop between the Tyr-Tyr and the first set of Phe-Phe motifs, allows the

624 aromatic tetrads in the variable domain to displace and to adopt the light-adapted state of this  
625 part in AnBLUF65 and AnBLUF46 (Fig 10). Thus, the calculated strengthening of the  $\pi$ - $\pi$  tetrads in  
626 AnBLUF65 and the displacements of these residues between the dark and the light-adapted forms  
627 in BlsA as observed by Chitrakar et al 2020, reinforce the idea that intramolecular signaling events  
628 involve, at least in part, hydrophobic/aromatic interactions. The extent to which these networks  
629 are present in other members of the genus *Acinetobacter*, and other microorganisms remain to be  
630 further explored.

631 **Fig 10: Intra-protein aromatic networks in BLUFs from *A. nosocomialis*.** Black ribbons represent  $\beta$  sheet  
632 dividing protein in two areas: Flavin/N-terminal area and variable domain. Solid lines correspond to main  
633 chain covalent bonds. Dashed lines represent relative distances between aromatic centroids for dark (black)  
634 and blue light (blue).

635

636 Overall, in this work, we have characterized different BLUF photoreceptors and show that they are  
637 operative at different temperature ranges. Despite diverse BLUF-coding genes are encoded in *A.*  
638 *nosocomialis*, not all are physiologically functional. It is worth mentioning that AnBLUF65 is the  
639 only BLUF-protein found to be expressed in *A. nosocomialis*, and the possibility raises that the  
640 other BLUF-photoreceptors are expressed under different conditions, such as growth media,  
641 temperatures, presence of a host, etc. The presence of AnBLUF85 only in two different *A.*  
642 *nosocomialis* strains and discretionally in other species of the *Acinetobacter* genus is striking, in  
643 addition to the fact that this photoreceptor is not stable and not expressed in its host. The overall  
644 information suggests that this gene might be cryptic; despite it does not seem to be subjected to  
645 genetic drift as its sequence is conserved in different species, and questions arise regarding its  
646 evolutionary origin and functionality.

647

## 648 **Acknowledgment**

649 This work was supported by grants from the Agencia Nacional de Promoción Científica y  
650 Tecnológica (PICT 2018- 00793) to MAM, the Consejo Nacional de Investigaciones Científicas y  
651 Tecnológicas (PIP 2017-0493) to IA and ASaCTel (Ministerio de Ciencia, Tecnología e Innovación  
652 Productiva de la Provincia de Santa Fe) IO-021-18 to MAM. We would like to thank Dr. Javier M.  
653 González for his critical reading of the manuscript and suggestions. Also, Lic. Alba Loto for her  
654 assistance with protein overexpression and purification. IA, CDB and MAM are career investigators  
655 of CONICET. BPM and MRT are fellows from the same institution. LV is a Universidad Nacional de  
656 Santiago del Estero investigator.

657

## 658 **References**

- 659 1. Nemeč A, Krizová L, Maixnerová M, van der Reijden TJ, Deschaght P, Passet V, et al.  
660 Genotypic and phenotypic characterization of the *Acinetobacter calcoaceticus*-*Acinetobacter*  
661 *baumannii* complex with the proposal of *Acinetobacter pittii* sp. nov. (formerly *Acinetobacter*  
662 genomic species 3) and *Acinetobacter nosocomialis* sp. nov. (formerly *Acinetobacter* genomic  
663 species 13TU). *Research in microbiology*. 2011;162(4):393-404. Epub 2011/02/16. doi:  
664 10.1016/j.resmic.2011.02.006. PubMed PMID: 21320596.
- 665 2. Knight DB, Rudin SD, Bonomo RA, Rather PN. *Acinetobacter nosocomialis*: Defining the  
666 Role of Efflux Pumps in Resistance to Antimicrobial Therapy, Surface Motility, and Biofilm  
667 Formation. *Frontiers in microbiology*. 2018;9:1902. Epub 2018/09/07. doi:  
668 10.3389/fmicb.2018.01902. PubMed PMID: 30186249; PubMed Central PMCID:  
669 PMC6111201.
- 670 3. Dijkshoorn L, Nemeč A, Seifert H. An increasing threat in hospitals: multidrug-resistant  
671 *Acinetobacter baumannii*. *Nature reviews Microbiology*. 2007;5(12):939-51. Epub 2007/11/17. doi:  
672 10.1038/nrmicro1789. PubMed PMID: 18007677.
- 673 4. Xie R, Zhang XD, Zhao Q, Peng B, Zheng J. Analysis of global prevalence of antibiotic  
674 resistance in *Acinetobacter baumannii* infections disclosed a faster increase in OECD countries.  
675 *Emerging microbes & infections*. 2018;7(1):31. doi: 10.1038/s41426-018-0038-9. PubMed PMID:  
676 29535298; PubMed Central PMCID: PMC5849731.
- 677 5. Wisplinghoff H, Paulus T, Lugenheim M, Stefanik D, Higgins PG, Edmond MB, et al.  
678 Nosocomial bloodstream infections due to *Acinetobacter baumannii*, *Acinetobacter pittii* and  
679 *Acinetobacter nosocomialis* in the United States. *J Infect*. 2012;64(3):282-90. Epub 2012/01/03.  
680 doi: 10.1016/j.jinf.2011.12.008. PubMed PMID: 22209744.
- 681 6. Chusri S, Chongsuvivatwong V, Rivera JI, Silpapojakul K, Singkhamanan K, McNeil E, et al.  
682 Clinical outcomes of hospital-acquired infection with *Acinetobacter nosocomialis* and  
683 *Acinetobacter pittii*. *Antimicrobial agents and chemotherapy*. 2014;58(7):4172-9. Epub  
684 2014/05/14. doi: 10.1128/AAC.02992-14. PubMed PMID: 24820079; PubMed Central PMCID:  
685 PMC4068534.
- 686 7. Huang L, Chen TL, Lee YT, Lee MH, Kuo SC, Yu KW, et al. Risk factors for imipenem-  
687 nonsusceptible *Acinetobacter nosocomialis* bloodstream infection. *J Microbiol Immunol Infect*.  
688 2014;47(4):311-7. Epub 2013/05/07. doi: 10.1016/j.jmii.2013.02.002. PubMed PMID: 23642729.



- 689 8. Golic A, Vanechoutte M, Nemeč A, Viale AM, Actis LA, Mussi MA. Staring at the cold sun:  
690 blue light regulation is distributed within the genus *Acinetobacter*. *PloS one*. 2013;8(1):e55059.  
691 doi: 10.1371/journal.pone.0055059. PubMed PMID: 23358859; PubMed Central PMCID:  
692 PMC3554667.
- 693 9. Tuttobene M, Perez J, Pavesi E, Biancotti D, Cribb P, Altilio M, et al. Light modulates  
694 important pathogenic determinants and virulence in *Acinetobacter baumannii*, *Pseudomonas*  
695 *aeruginosa* and *Staphylococcus aureus* ESKAPE pathogens. . *Journal of bacteriology*. 2020;En  
696 revisión.
- 697 10. Abatedaga I, Valle L, Golic AE, Muller GL, Cabruja M, Moran Vieyra FE, et al. Integration of  
698 Temperature and Blue-Light Sensing in *Acinetobacter baumannii* Through the BlsA Sensor.  
699 *Photochemistry and photobiology*. 2017;93(3):805-14. doi: 10.1111/php.12760. PubMed PMID:  
700 28500705.
- 701 11. Golic AE, Valle L, Jaime PC, Alvarez CE, Parodi C, Borsarelli CD, et al. BlsA Is a Low to  
702 Moderate Temperature Blue Light Photoreceptor in the Human Pathogen *Acinetobacter*  
703 *baumannii*. *Frontiers in microbiology*. 2019;10:1925. Epub 2019/09/10. doi:  
704 10.3389/fmicb.2019.01925. PubMed PMID: 31497002; PubMed Central PMCID: PMC6712483.
- 705 12. Bitrian M, Gonzalez RH, Paris G, Hellingwerf KJ, Nudel CB. Blue-light-dependent inhibition  
706 of twitching motility in *Acinetobacter baylyi* ADP1: additive involvement of three BLUF-domain-  
707 containing proteins. *Microbiology (Reading)*. 2013;159(Pt 9):1828-41. Epub 2013/07/03. doi:  
708 10.1099/mic.0.069153-0. PubMed PMID: 23813679.
- 709 13. Schramm STJ, Place K, Montana S, Almuzara M, Fung S, Fernandez JS, et al. Genetic and  
710 Phenotypic Features of a Novel *Acinetobacter* Species, Strain A47, Isolated From the Clinical  
711 Setting. *Frontiers in microbiology*. 2019;10:1375. Epub 2019/07/06. doi:  
712 10.3389/fmicb.2019.01375. PubMed PMID: 31275288; PubMed Central PMCID: PMC6591377.
- 713 14. Muller GL, Tuttobene M, Altilio M, Martinez Amezaga M, Nguyen M, Cribb P, et al. Light  
714 Modulates Metabolic Pathways and Other Novel Physiological Traits in the Human Pathogen  
715 *Acinetobacter baumannii*. *Journal of bacteriology*. 2017;199(10). doi: 10.1128/JB.00011-17.  
716 PubMed PMID: 28289081; PubMed Central PMCID: PMC5405214.
- 717 15. Mussi MA, Gaddy JA, Cabruja M, Arivett BA, Viale AM, Rasia R, et al. The opportunistic  
718 human pathogen *Acinetobacter baumannii* senses and responds to light. *Journal of bacteriology*.  
719 2010;192(24):6336-45. doi: 10.1128/JB.00917-10. PubMed PMID: 20889755; PubMed Central  
720 PMCID: PMC3008525.

- 721 16. Ramirez MS, Traglia GM, Perez JF, Muller GL, Martinez MF, Golic AE, et al. White and blue  
722 light induce reduction in susceptibility to minocycline and tigecycline in *Acinetobacter* spp. and  
723 other bacteria of clinical importance. *Journal of medical microbiology*. 2015;64(Pt 5):525-37. doi:  
724 10.1099/jmm.0.000048. PubMed PMID: 25737436.
- 725 17. Tuttobene MR, Cribb P, Mussi MA. BlsA integrates light and temperature signals into iron  
726 metabolism through Fur in the human pathogen *Acinetobacter baumannii*. *Scientific reports*.  
727 2018;8(1):7728. doi: 10.1038/s41598-018-26127-8. PubMed PMID: 29769610; PubMed Central  
728 PMCID: PMC5955987.
- 729 18. Tuttobene MR, Fernandez-Garcia L, Blasco L, Cribb P, Ambroa A, Muller GL, et al. Quorum  
730 and Light Signals Modulate Acetoin/Butanediol Catabolism in *Acinetobacter* spp. *Frontiers in*  
731 *microbiology*. 2019;10:1376. doi: 10.3389/fmicb.2019.01376. PubMed PMID: 31281296; PubMed  
732 Central PMCID: PMC6595428.
- 733 19. Hellemans J, Mortier G, De Paepe A, Speleman F, Vandesompele J. qBase relative  
734 quantification framework and software for management and automated analysis of real-time  
735 quantitative PCR data. *Genome biology*. 2007;8(2):R19. doi: 10.1186/gb-2007-8-2-r19. PubMed  
736 PMID: 17291332; PubMed Central PMCID: PMC1852402.
- 737 20. Livak KJ, Schmittgen TD. Analysis of relative gene expression data using real-time  
738 quantitative PCR and the  $2(-\Delta\Delta C(T))$  Method. *Methods*. 2001;25(4):402-8. Epub  
739 2002/02/16. doi: 10.1006/meth.2001.1262. PubMed PMID: 11846609.
- 740 21. Waterhouse AM, Procter JB, Martin DM, Clamp M, Barton GJ. Jalview Version 2--a multiple  
741 sequence alignment editor and analysis workbench. *Bioinformatics*. 2009;25(9):1189-91. Epub  
742 2009/01/20. doi: 10.1093/bioinformatics/btp033. PubMed PMID: 19151095; PubMed Central  
743 PMCID: PMCPMC2672624.
- 744 22. Waterhouse A, Bertoni M, Bienert S, Studer G, Tauriello G, Gumienny R, et al. SWISS-  
745 MODEL: homology modelling of protein structures and complexes. *Nucleic acids research*.  
746 2018;46(W1):W296-W303. Epub 2018/05/23. doi: 10.1093/nar/gky427. PubMed PMID: 29788355;  
747 PubMed Central PMCID: PMCPMC6030848.
- 748 23. Piovesan D, Minervini G, Tosatto SC. The RING 2.0 web server for high quality residue  
749 interaction networks. *Nucleic acids research*. 2016;44(W1):W367-74. Epub 2016/05/21. doi:  
750 10.1093/nar/gkw315. PubMed PMID: 27198219; PubMed Central PMCID: PMCPMC4987896.
- 751 24. Webb-Robertson BJ, Wiberg HK, Matzke MM, Brown JN, Wang J, McDermott JE, et al.  
752 Review, evaluation, and discussion of the challenges of missing value imputation for mass  
753 spectrometry-based label-free global proteomics. *Journal of proteome research*. 2015;14(5):1993-

- 754 2001. Epub 2015/04/10. doi: 10.1021/pr501138h. PubMed PMID: 25855118; PubMed Central  
755 PMCID: PMCPMC4776766.
- 756 25. Potron A, Poirel L, Croize J, Chanteperrin V, Nordmann P. Genetic and biochemical  
757 characterization of the first extended-spectrum CARB-type beta-lactamase, RTG-4, from  
758 *Acinetobacter baumannii*. *Antimicrobial agents and chemotherapy*. 2009;53(7):3010-6. Epub  
759 2009/04/22. doi: 10.1128/AAC.01164-08. PubMed PMID: 19380596; PubMed Central PMCID:  
760 PMCPMC2704689.
- 761 26. Fujisawa T, Masuda S. Light-induced chromophore and protein responses and mechanical  
762 signal transduction of BLUF proteins. *Biophysical reviews*. 2018;10(2):327-37. Epub 2017/12/14.  
763 doi: 10.1007/s12551-017-0355-6. PubMed PMID: 29235080; PubMed Central PMCID:  
764 PMCPMC5899715.
- 765 27. Valle L, Vieyra FE, Borsarelli CD. Hydrogen-bonding modulation of excited-state properties  
766 of flavins in a model of aqueous confined environment. *Photochemical & photobiological sciences*  
767 : Official journal of the European Photochemistry Association and the European Society for  
768 Photobiology. 2012;11(6):1051-61. Epub 2012/03/22. doi: 10.1039/c2pp05385c. PubMed PMID:  
769 22434390.
- 770 28. Kraft BJ, Masuda S, Kikuchi J, Dragnea V, Tollin G, Zaleski JM, et al. Spectroscopic and  
771 mutational analysis of the blue-light photoreceptor AppA: a novel photocycle involving flavin  
772 stacking with an aromatic amino acid. *Biochemistry*. 2003;42(22):6726-34. Epub 2003/06/05. doi:  
773 10.1021/bi030055o. PubMed PMID: 12779327.
- 774 29. Villegas JM, Valle L, Moran Vieyra FE, Rintoul MR, Borsarelli CD, Rapisarda VA. FAD binding  
775 properties of a cytosolic version of *Escherichia coli* NADH dehydrogenase-2. *Biochim Biophys Acta*.  
776 2014;1844(3):576-84. Epub 2014/01/15. doi: 10.1016/j.bbapap.2013.12.021. PubMed PMID:  
777 24418395.
- 778 30. Tanwar M, Nahar S, Gulati S, Veetil SK, Kateriya S. Molecular determinant modulates  
779 thermal recovery kinetics and structural integrity of the bacterial BLUF photoreceptor. *FEBS*  
780 *letters*. 2016;590(14):2146-57. Epub 2016/05/28. doi: 10.1002/1873-3468.12227. PubMed PMID:  
781 27230699.
- 782 31. Valle L, Abatedaga I, Vieyra FE, Bortolotti A, Cortez N, Borsarelli CD. Enhancement of  
783 photophysical and photosensitizing properties of flavin adenine dinucleotide by mutagenesis of  
784 the C-terminal extension of a bacterial flavodoxin reductase. *Chemphyschem*. 2015;16(4):872-83.  
785 Epub 2015/02/03. doi: 10.1002/cphc.201402774. PubMed PMID: 25641205.

- 786 32. Chitrakar I, Iuliano JN, He Y, Woroniecka HA, Tolentino Collado J, Wint JM, et al. Structural  
787 Basis for the Regulation of Biofilm Formation and Iron Uptake in *A. baumannii* by the Blue-Light-  
788 Using Photoreceptor, BlsA. *ACS Infect Dis.* 2020;6(10):2592-603. Epub 2020/09/15. doi:  
789 10.1021/acscinfecdis.0c00156. PubMed PMID: 32926768.
- 790 33. Khrenova K. DT, Nemukhinac A. Molecular mechanism of the dark-state recovery in BLUF  
791 photoreceptors. *Chemical Physics Letters.* 2017;676. doi: doi.org/10.1016/j.cplett.2017.03.035.
- 792 34. Lanzarotti E, Biekofsky RR, Estrin DA, Marti MA, Turjanski AG. Aromatic-aromatic  
793 interactions in proteins: beyond the dimer. *Journal of chemical information and modeling.*  
794 2011;51(7):1623-33. Epub 2011/06/15. doi: 10.1021/ci200062e. PubMed PMID: 21662246.
- 795 35. Pezza A, Tuttobene M, Abatedaga I, Valle L, Borsarelli CD, Mussi MA. Through the eyes of a  
796 pathogen: light perception and signal transduction in *Acinetobacter baumannii*. *Photochemical &*  
797 *photobiological sciences : Official journal of the European Photochemistry Association and the*  
798 *European Society for Photobiology.* 2019;18(10):2363-73. Epub 2019/07/11. doi:  
799 10.1039/c9pp00261h. PubMed PMID: 31290528.
- 800 36. Park YJ, Song ES, Kim YT, Noh TH, Kang HW, Lee BM. Analysis of virulence and growth of a  
801 purine auxotrophic mutant of *Xanthomonas oryzae* pathovar *oryzae*. *FEMS microbiology letters.*  
802 2007;276(1):55-9. Epub 2007/09/25. doi: 10.1111/j.1574-6968.2007.00909.x. PubMed PMID:  
803 17888004.
- 804 37. Kilstrup M, Hammer K, Ruhdal Jensen P, Martinussen J. Nucleotide metabolism and its  
805 control in lactic acid bacteria. *FEMS microbiology reviews.* 2005;29(3):555-90. Epub 2005/06/07.  
806 doi: 10.1016/j.femsre.2005.04.006. PubMed PMID: 15935511.
- 807 38. McFarland WC, Stocker BA. Effect of different purine auxotrophic mutations on mouse-  
808 virulence of a Vi-positive strain of *Salmonella dublin* and of two strains of *Salmonella typhimurium*.  
809 *Microb Pathog.* 1987;3(2):129-41. Epub 1987/08/01. doi: 10.1016/0882-4010(87)90071-4.  
810 PubMed PMID: 2849016.
- 811 39. Mei JM, Nourbakhsh F, Ford CW, Holden DW. Identification of *Staphylococcus aureus*  
812 virulence genes in a murine model of bacteraemia using signature-tagged mutagenesis. *Molecular*  
813 *microbiology.* 1997;26(2):399-407. Epub 1998/02/12. doi: 10.1046/j.1365-2958.1997.5911966.x.  
814 PubMed PMID: 9383163.
- 815 40. Samant S, Lee H, Ghassemi M, Chen J, Cook JL, Mankin AS, et al. Nucleotide biosynthesis is  
816 critical for growth of bacteria in human blood. *PLoS pathogens.* 2008;4(2):e37. Epub 2008/02/20.  
817 doi: 10.1371/journal.ppat.0040037. PubMed PMID: 18282099; PubMed Central PMCID:  
818 PMCPMC2242838.

- 819 41. Hobbs G. FC, Gardner D., Flett F., Oliver S. Pigmented antibiotic production by  
820 *Streptomyces coelicolor* A3(2): kinetics and the influence of nutrients. *Microbiology*. 1990;136(11).  
821 doi: [doi.org/10.1099/00221287-136-11-2291](https://doi.org/10.1099/00221287-136-11-2291).
- 822 42. Navone L, Casati P, Licona-Cassani C, Marcellin E, Nielsen LK, Rodriguez E, et al. Allantoin  
823 catabolism influences the production of antibiotics in *Streptomyces coelicolor*. *Applied*  
824 *microbiology and biotechnology*. 2014;98(1):351-60. Epub 2013/12/03. doi: [10.1007/s00253-013-](https://doi.org/10.1007/s00253-013-5372-1)  
825 [5372-1](https://doi.org/10.1007/s00253-013-5372-1). PubMed PMID: 24292080.
- 826 43. Burns RO, Umbarger HE, Gross SR. The Biosynthesis of Leucine. Iii. The Conversion of  
827 Alpha-Hydroxy-Beta-Carboxyisocaproate to Alpha-Ketoisocaproate. *Biochemistry*. 1963;2:1053-8.  
828 Epub 1963/09/01. doi: [10.1021/bi00905a024](https://doi.org/10.1021/bi00905a024). PubMed PMID: 14087358.
- 829 44. Csonka LN, Leisinger T. Biosynthesis of Proline. *EcoSal Plus*. 2007;2(2). Epub 2007/04/01.  
830 doi: [10.1128/ecosalplus.3.6.1.4](https://doi.org/10.1128/ecosalplus.3.6.1.4). PubMed PMID: 26443591.
- 831 45. Trovato M. FG, Signorelli S., Funck D. . Proline metabolism and its functions in  
832 development and stress tolerance. . In: Springer, editor. In *Osmoprotectant-Mediated Abiotic*  
833 *Stress Tolerance in Plants* 2019. p. 41-72.
- 834 46. Christgen SL, Becker DF. Role of Proline in Pathogen and Host Interactions. *Antioxid Redox*  
835 *Signal*. 2019;30(4):683-709. Epub 2017/12/16. doi: [10.1089/ars.2017.7335](https://doi.org/10.1089/ars.2017.7335). PubMed PMID:  
836 [29241353](https://pubmed.ncbi.nlm.nih.gov/29241353/); PubMed Central PMCID: [PMCPMC6338583](https://pubmed.ncbi.nlm.nih.gov/PMC6338583/).
- 837 47. Sklar JG, Wu T, Kahne D, Silhavy TJ. Defining the roles of the periplasmic chaperones SurA,  
838 Skp, and DegP in *Escherichia coli*. *Genes Dev*. 2007;21(19):2473-84. Epub 2007/10/03. doi:  
839 [10.1101/gad.1581007](https://doi.org/10.1101/gad.1581007). PubMed PMID: 17908933; PubMed Central PMCID: [PMCPMC1993877](https://pubmed.ncbi.nlm.nih.gov/PMC1993877/).
- 840 48. Nikaïdo H. Molecular basis of bacterial outer membrane permeability revisited. *Microbiol*  
841 *Mol Biol Rev*. 2003;67(4):593-656. Epub 2003/12/11. doi: [10.1128/mmbr.67.4.593-656.2003](https://doi.org/10.1128/mmbr.67.4.593-656.2003).  
842 PubMed PMID: [14665678](https://pubmed.ncbi.nlm.nih.gov/14665678/); PubMed Central PMCID: [PMCPMC309051](https://pubmed.ncbi.nlm.nih.gov/PMC309051/).
- 843 49. Klein K, Sonnabend MS, Frank L, Leibiger K, Franz-Wachtel M, Macek B, et al. Deprivation  
844 of the Periplasmic Chaperone SurA Reduces Virulence and Restores Antibiotic Susceptibility of  
845 Multidrug-Resistant *Pseudomonas aeruginosa*. *Frontiers in microbiology*. 2019;10:100. Epub  
846 2019/03/09. doi: [10.3389/fmicb.2019.00100](https://doi.org/10.3389/fmicb.2019.00100). PubMed PMID: [30846971](https://pubmed.ncbi.nlm.nih.gov/30846971/); PubMed Central PMCID:  
847 [PMCPMC6394205](https://pubmed.ncbi.nlm.nih.gov/PMC6394205/).
- 848 50. Lee K, Lee KM, Go J, Ryu JC, Ryu JH, Yoon SS. The ferrichrome receptor A as a new target  
849 for *Pseudomonas aeruginosa* virulence attenuation. *FEMS microbiology letters*. 2016;363(11).  
850 Epub 2016/05/18. doi: [10.1093/femsle/fnw104](https://doi.org/10.1093/femsle/fnw104). PubMed PMID: 27190289.

- 851 51. Morris RC, Elliott MS. Queuosine modification of tRNA: a case for convergent evolution.  
852 Mol Genet Metab. 2001;74(1-2):147-59. Epub 2001/10/11. doi: 10.1006/mgme.2001.3216.  
853 PubMed PMID: 11592812.
- 854 52. Durand JM, Bjork GR, Kuwae A, Yoshikawa M, Sasakawa C. The modified nucleoside 2-  
855 methylthio-N6-isopentenyladenosine in tRNA of *Shigella flexneri* is required for expression of  
856 virulence genes. Journal of bacteriology. 1997;179(18):5777-82. Epub 1997/09/19. doi:  
857 10.1128/jb.179.18.5777-5782.1997. PubMed PMID: 9294434; PubMed Central PMCID:  
858 PMCPMC179466.
- 859 53. Durand JM, Dagberg B, Uhlin BE, Bjork GR. Transfer RNA modification, temperature and  
860 DNA superhelicity have a common target in the regulatory network of the virulence of *Shigella*  
861 *flexneri*: the expression of the *virF* gene. Molecular microbiology. 2000;35(4):924-35. Epub  
862 2000/02/26. doi: 10.1046/j.1365-2958.2000.01767.x. PubMed PMID: 10692168.
- 863 54. LaMarre JM, Howden BP, Mankin AS. Inactivation of the indigenous methyltransferase  
864 RlmN in *Staphylococcus aureus* increases linezolid resistance. Antimicrobial agents and  
865 chemotherapy. 2011;55(6):2989-91. Epub 2011/03/30. doi: 10.1128/AAC.00183-11. PubMed  
866 PMID: 21444696; PubMed Central PMCID: PMCPMC3101465.
- 867 55. Liiv A, Karitkina D, Maivali U, Remme J. Analysis of the function of *E. coli* 23S rRNA helix-  
868 loop 69 by mutagenesis. BMC molecular biology. 2005;6:18. Epub 2005/08/02. doi: 10.1186/1471-  
869 2199-6-18. PubMed PMID: 16053518; PubMed Central PMCID: PMCPMC1190176.
- 870 56. Arias M, Fleischner, G., Kirsch. R., Mishkin, S., Gatmaitan, Z. . In: I. M. Arias WB, Jakoby,  
871 editor. In Glutathione: Metabolism and Function1976. p. 175-88.
- 872 57. Sheehan D, Meade G, Foley VM, Dowd CA. Structure, function and evolution of  
873 glutathione transferases: implications for classification of non-mammalian members of an ancient  
874 enzyme superfamily. Biochem J. 2001;360(Pt 1):1-16. Epub 2001/11/07. doi: 10.1042/0264-  
875 6021:3600001. PubMed PMID: 11695986; PubMed Central PMCID: PMCPMC1222196.
- 876 58. Cerqueira GM, Kostoulias X, Khoo C, Aibinu I, Qu Y, Traven A, et al. A global virulence  
877 regulator in *Acinetobacter baumannii* and its control of the phenylacetic acid catabolic pathway.  
878 The Journal of infectious diseases. 2014;210(1):46-55. doi: 10.1093/infdis/jiu024. PubMed PMID:  
879 24431277.
- 880 59. Bhuiyan MS, Ellett F, Murray GL, Kostoulias X, Cerqueira GM, Schulze KE, et al.  
881 *Acinetobacter baumannii* phenylacetic acid metabolism influences infection outcome through a  
882 direct effect on neutrophil chemotaxis. Proceedings of the National Academy of Sciences of the

883 United States of America. 2016;113(34):9599-604. doi: 10.1073/pnas.1523116113. PubMed PMID:  
884 27506797; PubMed Central PMCID: PMC5003227.

885 60. Samuel J, Tanner ME. Mechanistic aspects of enzymatic carbohydrate epimerization. Nat  
886 Prod Rep. 2002;19(3):261-77. Epub 2002/07/26. doi: 10.1039/b100492l. PubMed PMID:  
887 12137277.

888 61. Cress BF, Englaender JA, He W, Kasper D, Linhardt RJ, Koffas MA. Masquerading microbial  
889 pathogens: capsular polysaccharides mimic host-tissue molecules. FEMS microbiology reviews.  
890 2014;38(4):660-97. Epub 2014/01/01. doi: 10.1111/1574-6976.12056. PubMed PMID: 24372337;  
891 PubMed Central PMCID: PMCPMC4120193.

892 62. Velloso LM, Bhaskaran SS, Schuch R, Fischetti VA, Stebbins CE. A structural basis for the  
893 allosteric regulation of non-hydrolysing UDP-GlcNAc 2-epimerases. EMBO Rep. 2008;9(2):199-205.  
894 Epub 2008/01/12. doi: 10.1038/sj.embor.7401154. PubMed PMID: 18188181; PubMed Central  
895 PMCID: PMCPMC2246411.

896 63. Hurlburt NK, Guan J, Ong H, Yu H, Chen X, Fisher AJ. Structural characterization of a  
897 nonhydrolyzing UDP-GlcNAc 2-epimerase from *Neisseria meningitidis* serogroup A. Acta  
898 Crystallogr F Struct Biol Commun. 2020;76(Pt 11):557-67. Epub 2020/11/03. doi:  
899 10.1107/S2053230X20013680. PubMed PMID: 33135674; PubMed Central PMCID:  
900 PMCPMC7605110.

901 64. Mann PA, Muller A, Wolff KA, Fischmann T, Wang H, Reed P, et al. Chemical Genetic  
902 Analysis and Functional Characterization of Staphylococcal Wall Teichoic Acid 2-Epimerases  
903 Reveals Unconventional Antibiotic Drug Targets. PLoS pathogens. 2016;12(5):e1005585. Epub  
904 2016/05/06. doi: 10.1371/journal.ppat.1005585. PubMed PMID: 27144276; PubMed Central  
905 PMCID: PMCPMC4856313.

906

907



## 908 **Supporting information**

### 909 **S1 Fig. Genomic context of AnBLUF65 homologs present in different strains of *A. nosocomialis*.**

910 (A). Coding-sequences (CDSs) are located in their corresponding frame. AnBLUF65 is indicated as  
911 pink arrow. Different colors indicate different functions. Gene annotations are indicated as  
912 numbers above the schemes, with the following codes: 1- AnBLUF65, 2- DUF2171, 3- Acyl-CoA-  
913 dehydrogenase, 4- GlcNAc-PI-de-N-acetylase, 5- methyltransferase domain, 6- glycosyltransferase,  
914 7- DDE endonuclease domain, putative transposase, 8- helix-turn-helix fo DDE superfamily  
915 endonuclease, 9- BOF- class 2b aminoacyl-tRNA synthetases- NirD/YgiW/Y damily stress tolerance  
916 protein, 10- HP, 11- poly (R)-hydroxyalkanoic acid synthase, 12- sodium/glutamate symporter, 13-  
917 proton antiporter-2 (CPA2) family, 14- NDAB- Rossmann Superfamily- Oxidoreductase, 15- DoxX-  
918 like family, 16- LysR family transcriptional regulator, 17- AKR15A family of aldo-keto reductase, 18-  
919 pyrabactin resistance 1 (PYR1) receptor, 19- type I secretion target GGXGXDXXX repeat protein,  
920 20- Paax domain, 21- glutathione-regulated potassium-efflux system protein KefC, 22- IS3 family  
921 transposase, 23- L- asparagine transporter.

### 922 **S2 Fig. Genomic context of AnBLUF46 homologs present in different strains of *A. nosocomialis*.**

923 (A). Coding-sequences (CDSs) are located in their corresponding frame. AnBLUF46 is indicated as  
924 pink arrow. Different colors indicate different functions. Gene annotations are indicated as  
925 numbers above the schemes, with the following codes: 1- AnBLUF46, 2- aromatic acid:H<sup>+</sup>  
926 symporter (AAHS), 3- AraC family transcriptional regulator RmlC-cupin protein, 4- 3-  
927 hydroxybuvrate dehydrogenase, 5- H<sup>+</sup>/gluconate symporter, 6- MBL fold metallo-hydrolase, 7-  
928 HP, 8- DUF2846- putative conjugal domain, 9- DUF3298- putative heat shock protein, 10- HP, 11-  
929 LysR family transcriptional regulator, 12- succinyl-CoA:3- ketoacid-coenzyme A transferase subunit  
930 A, 13- succinyl-CoA:3-ketoacid-coenzyme A transferase subunit B, 14- multidrug efflux MFS  
931 transporter, 15- pimeloyl-ACP methyl ester carboxylesterase, 16- IS5 transposase, 17- TetR/AcrR



932 family transcriptional regulator, 18- DoxX family protein, 19- IS transposase, 20- anion permease  
933 ArsB/NhaD, 21- 3-oxoacyl-ACP reductase FabG, 22- nuclear transport factor 2 family protein, 23-  
934 fermentarion-respiration switch protein FrsA, 24- DDE transposase domain, 25- Bcr/CfIA family  
935 drug resistance efflux transporter.

936 **S3 Fig. Genomic context of AnBLUF85 homologs present in different strains of *A. nosocomialis*.**

937 (A). Coding-sequences (CDSs) are located in their corresponding frame. AnBLUF85 is indicated as  
938 pink arrow. Different colors indicate different functions. Gene annotations are indicated as  
939 numbers above the schemes, with the following codes: 1- AnBLUF85, 2- relaxase-MobA/MobL  
940 family protein, 3- FAM199X, 4-HP, 5- N-acetyltransferasa, 6- conjugal transfer pilus assembly  
941 protein TraB, 7-RepB initiator replication protein, 8- potasium transporter, 9-mRNA-degrading  
942 endonuclease RelE, 10- chromate transport protein ChrA.

943 **S4 Fig: Visible absorption spectra changes of AnBLUF85 photoreceptor by blue light**  
944 **illumination**, in working buffer solution at 12 °C. dAnBLUF85 (black line) and lAnBLUF 85 (pale  
945 green)

946

947

A

25°C

26°C

27°C

32°C

37°C

L

D

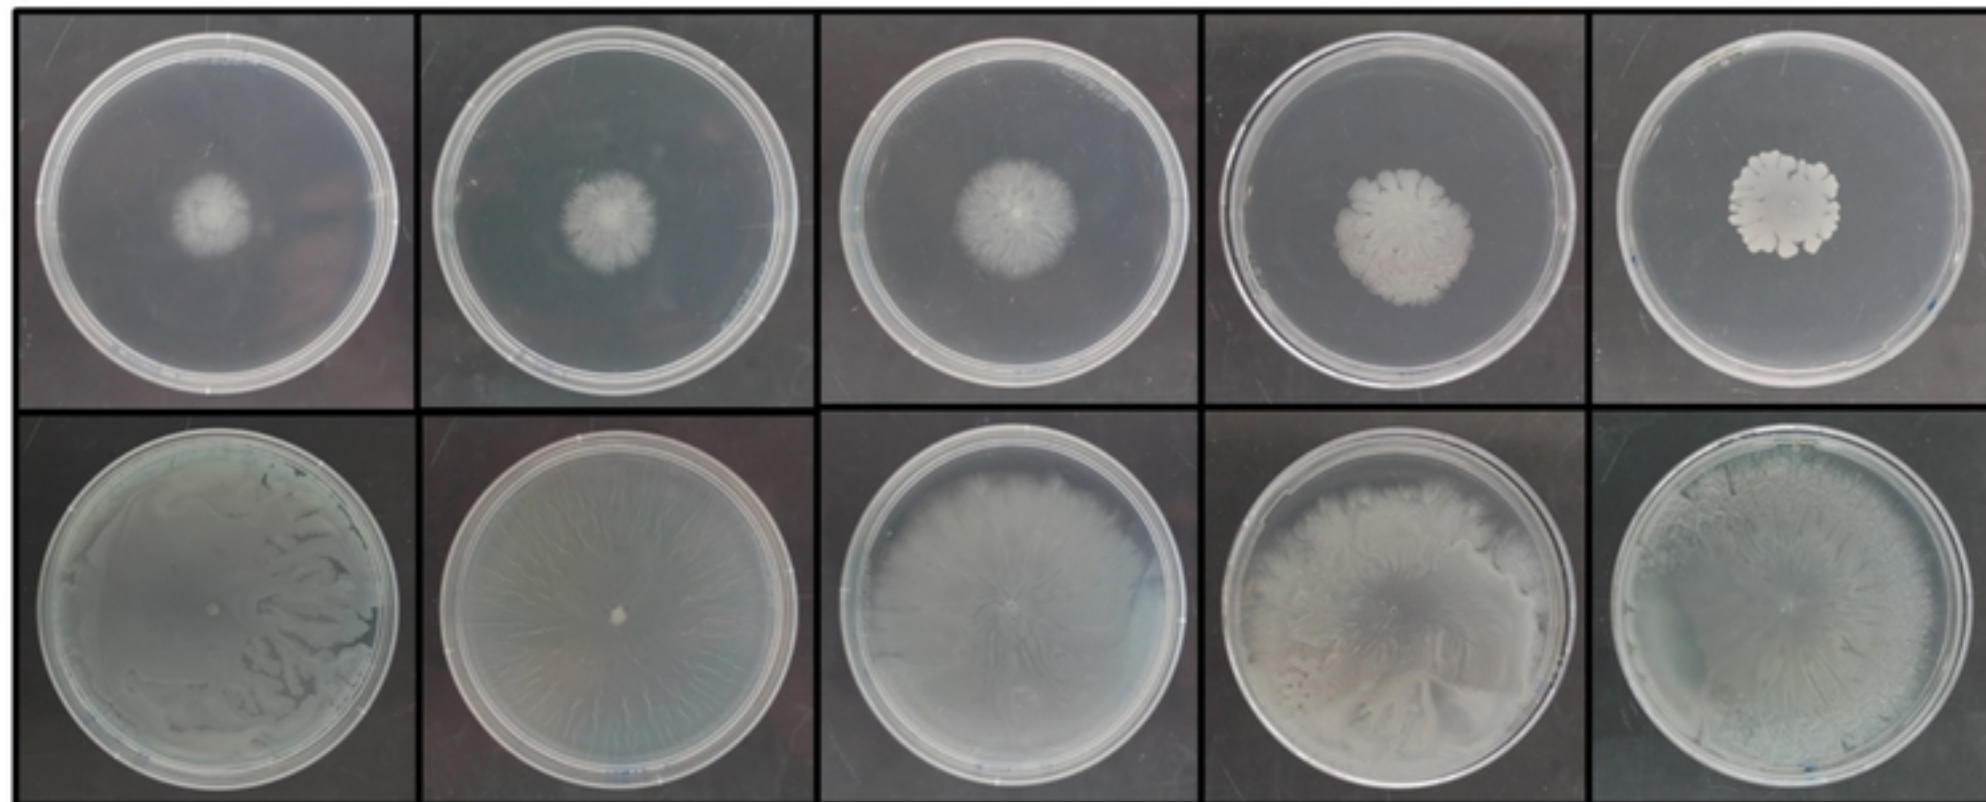

B

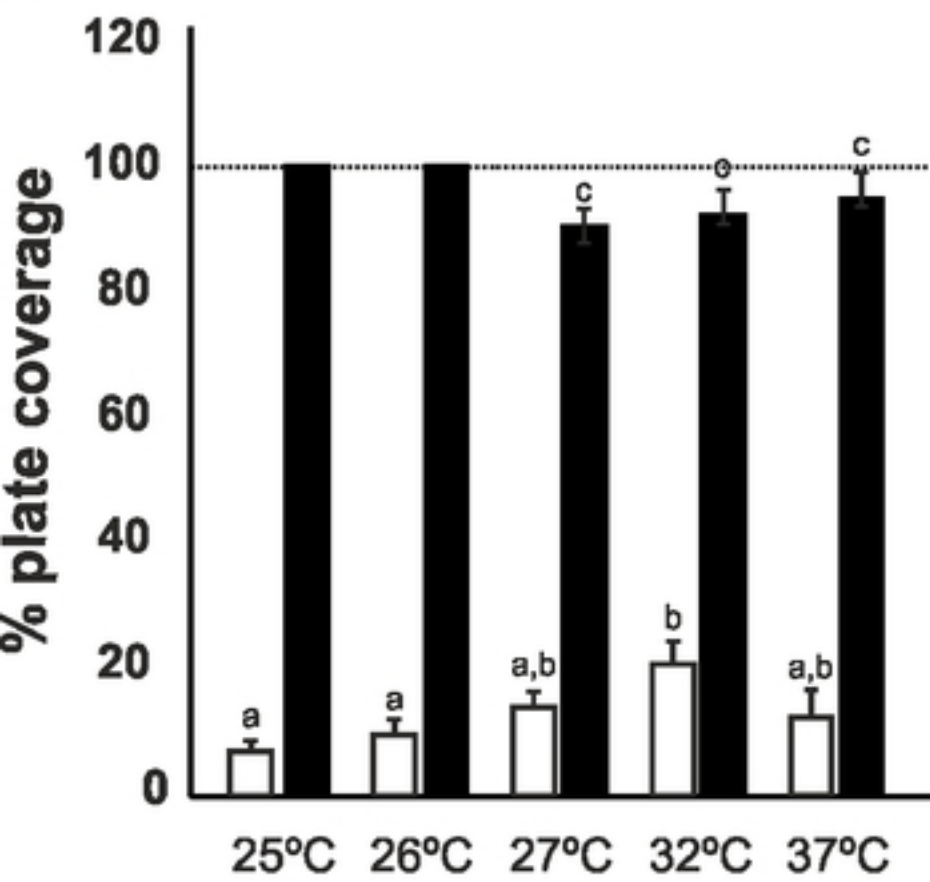

C

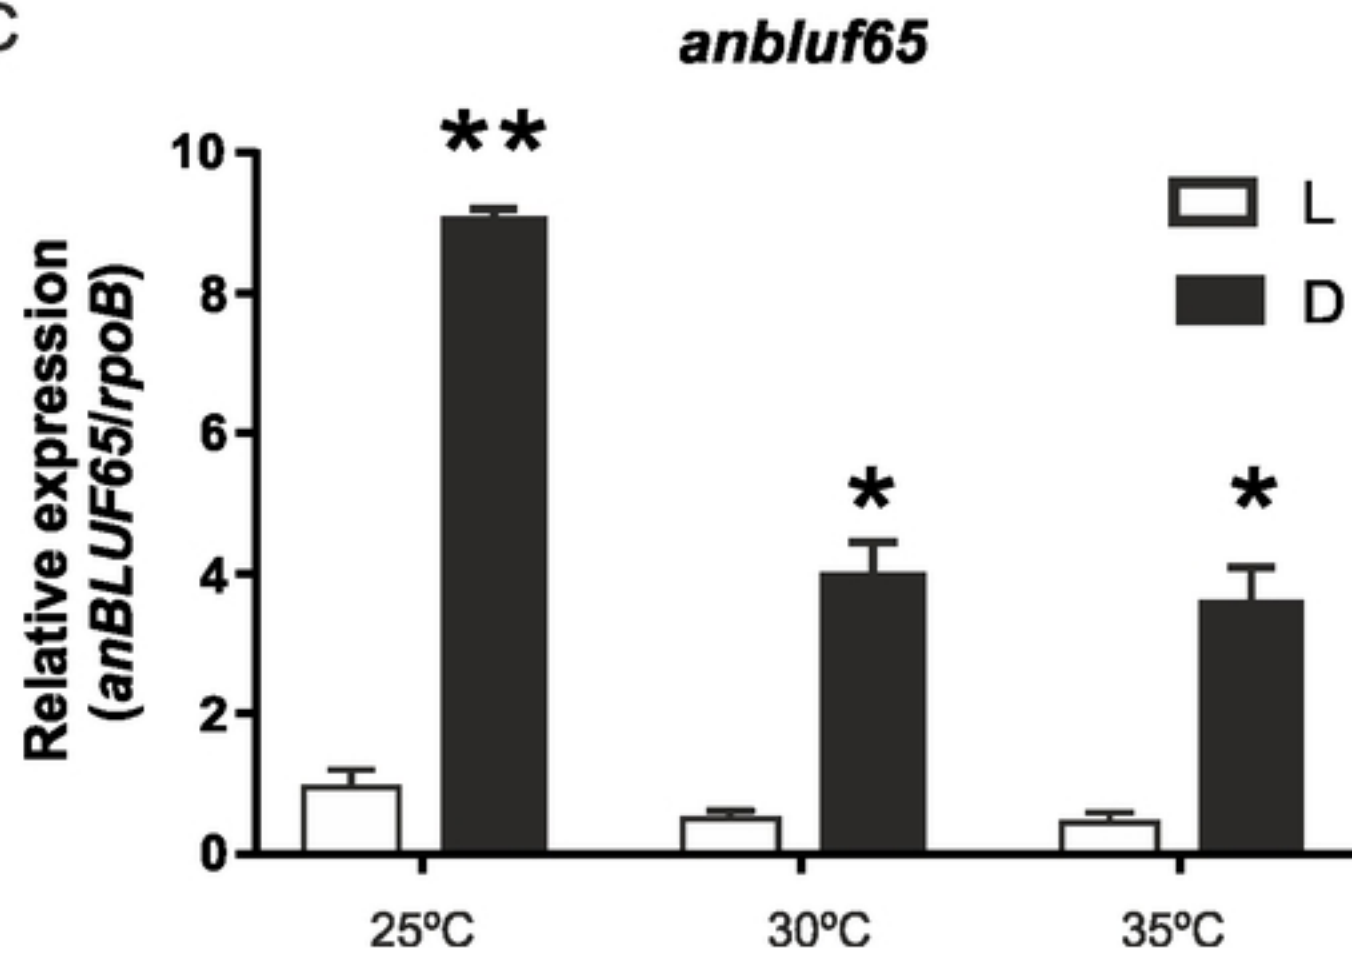

Figure



**A**

```

Slr1694 1 - - - - - - - - - - - - MSLYRL IYSSQG IPN - - LQPQDLKDI LESSQRN 31
TII0078 1 - - - - - - - - - - - - MGLHRL IYLS CATDG - - LSYPDLRDI IMAKSEVN 31
AnBLUF65 1 - - - - - - - - - - - - MNVRLCYASQRNENNEDLLQDLRDI L TEARDF 32
BlSA 1 - - - - - - - - - - - - MNVRLCYASQRNEKNEDLLQDLRDI L TEARDF 32
AnBLUF85 1 - - - - - - - - - - - - MNDFRL LYVSK IKSNI NPNV - DLYDI L TEAVAF 32
AnBLUF46 1 - - - - - - - - - - - - MSL IGFMYASK TNSEHSQ IKQDL I DI L TEAVKF 33
Appa 1 MQHDL EADV TMTGSDL VSCCYRSLAAPDL TLRDL LDI VETSQA H 44
BlrB 1 - - - - - - - - - - - - MDELVSLTYRSRVRLADPVA DIVQ I MRASRV R 32
  
```

```

Slr1694 32 NPANG I TGL LCYSKP AF LQV LE GE CEQV NETYHR - I VQDERHHS 74
TII0078 32 NLRDG I TGM L CYGNGM FLQT LE GD RQKV SETYAR - I LKDP RHHS 74
AnBLUF65 33 NDLNE I CGV L YYADNA FFQC LE GE KEV VERLFEK - I QKDQRH H N 75
BlSA 33 NDLNG I CGV L YYADNA FFQC LE GE QEV VERLFEK - I QKDQRH Y N 75
AnBLUF85 33 NSLNE I YGV L YYGNDY F IQCV EG QKD KVEYLFYEK I LKDP RHKN 76
AnBLUF46 34 NSQND I TG V L YYGNGY FLQY LE GE KEQV ETLFYKS I LKDS RHQN 77
Appa 45 NARAQL TGA LFYSQGV FFQWL E GRPAAVAEVMTH - IQRDRRHSN 87
BlrB 33 NLRLG I TG I LLYNGVHFVQT I EGPR SACDELFRL - I SADPRHQE 75
  
```

bioRxiv preprint doi: <https://doi.org/10.1101/2021.07.23.453528>; this version posted July 23, 2021. The copyright holder for this preprint (which was not certified by peer review) is the author/funder, who has granted bioRxiv a license to display the preprint in perpetuity. It is made available under aCC-BY 4.0 International license.

```

Slr1694 75 PQI I ECMP I RRRNF EVWSMQA I TVNDL STEQVKT L VLKYSGF TT 118
TII0078 75 AEI VEFKA I EERTF I NWSMRL VQLGEMSDT I RRLRLKYSPAAT 118
AnBLUF65 76 VKWL CTYS I EENS FQRWSMKYVQRNTN I EAFF LKMGEST FNP I L 119
BlSA 76 IKWL CTYS I DEHS FQRWSMKYVQRNTN I ETFF LNMGENT FNP L L 119
AnBLUF85 77 CEVLSFEN I EKYL FSAWHMKYAM I HKEV I DFFKH YHNDEFNPYL 120
AnBLUF46 78 CEI I FLEPSEQRL FKHWSMKFAP I NTK I KDFF FHHHVDEFNPYL 121
Appa 88 VEI LAEEP I AKRRF AGWHMQ LSCSEADMRS LG LAESRQ - - - - - 125
BlrB 76 ILAFDLEP I TARRFPDWSM R I VSRKELRALAPDLERLDLSGPE D 119
  
```

```

Slr1694 119 LRPSAMDPEQCLNFL LLDIAKIYELSDNFF LLDL - - - - - 150
TII0078 119 FQPRSMTAEQCFRFLKELYDMSQGS - - - - - 143
AnBLUF65 120 LNQQNLKFFLNELL IAEQTKVDTVKKVGMVNRGVNPF 156
BlSA 120 LNQQNLKFFLNELL IAEQTKMNTVKKVGMVNRGVNPF 156
AnBLUF85 121 LNSSTIPAF I - ELLSTHGDSFS I LKSKALKK - - - - - 150
AnBLUF46 122 LNTNSIPSF I - ELLVDQ - - - - PNLKADQYQV - - - - - 147
Appa - - - - - - - - - - - - - - - - - - - - - - - - - - - 140
BlrB 120 VAELHRTIAASLSKGDADASG - - - - - 140
  
```

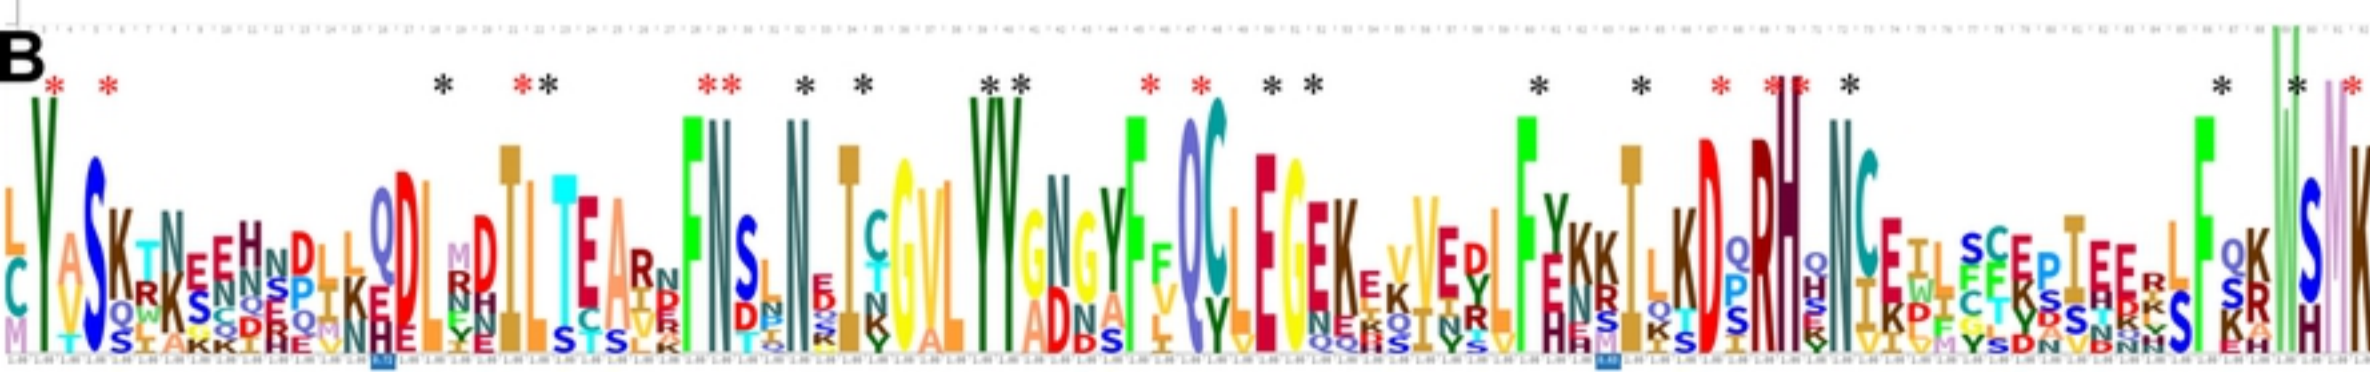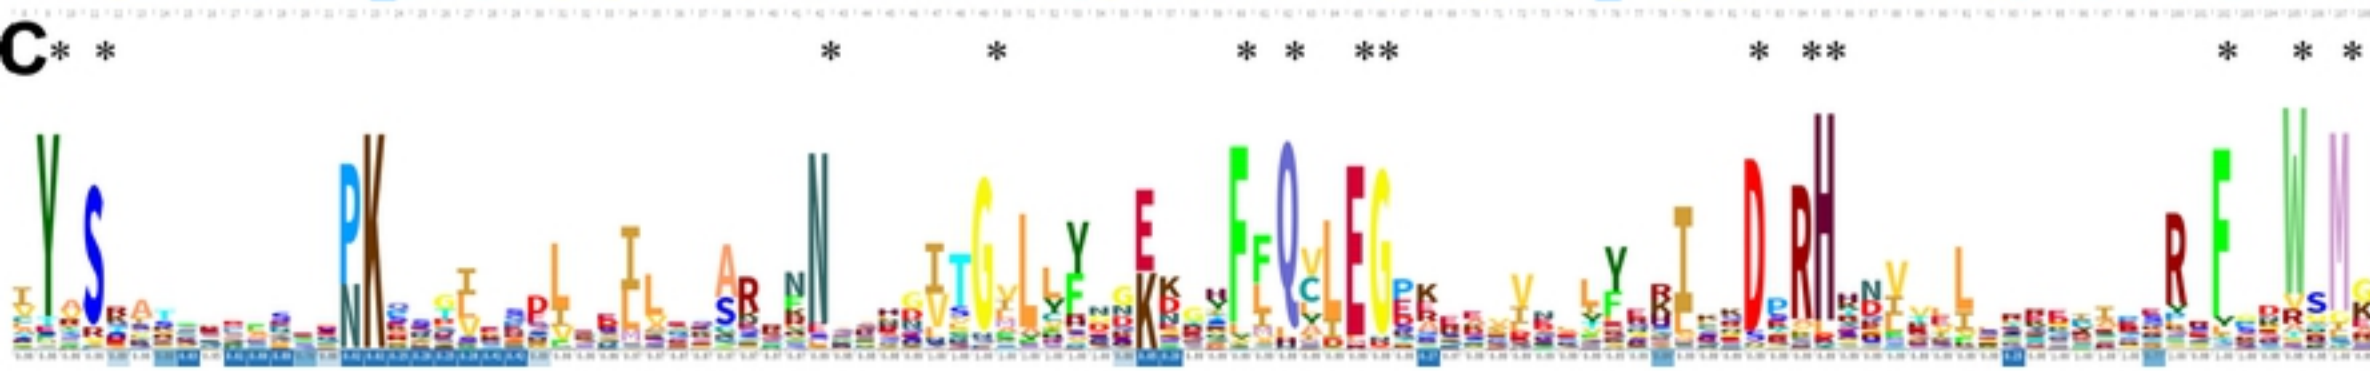

Figure



A

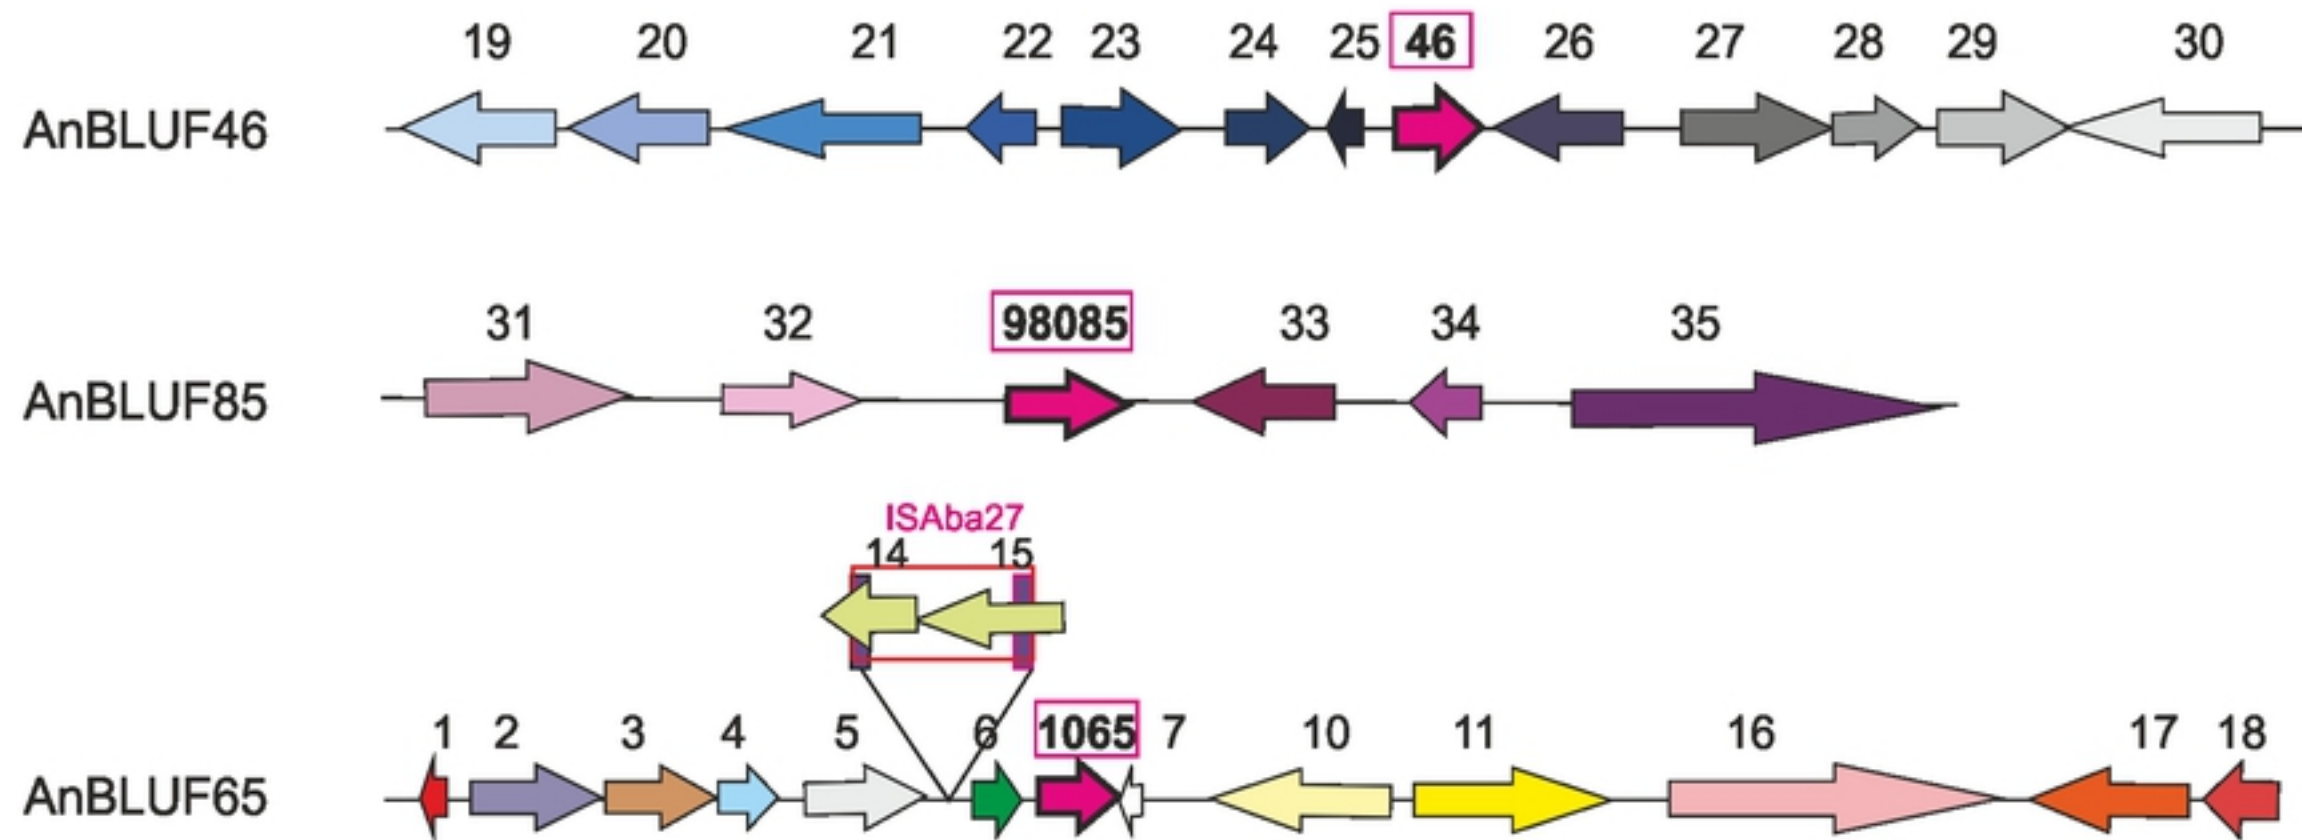

B

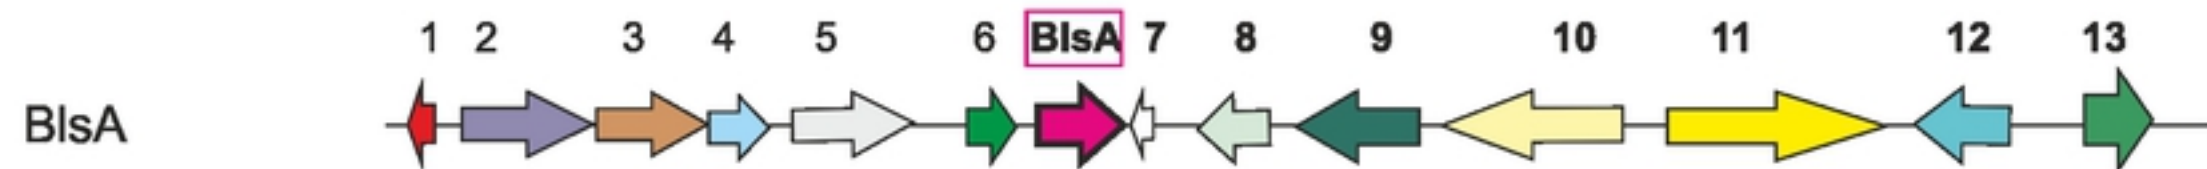

Figure

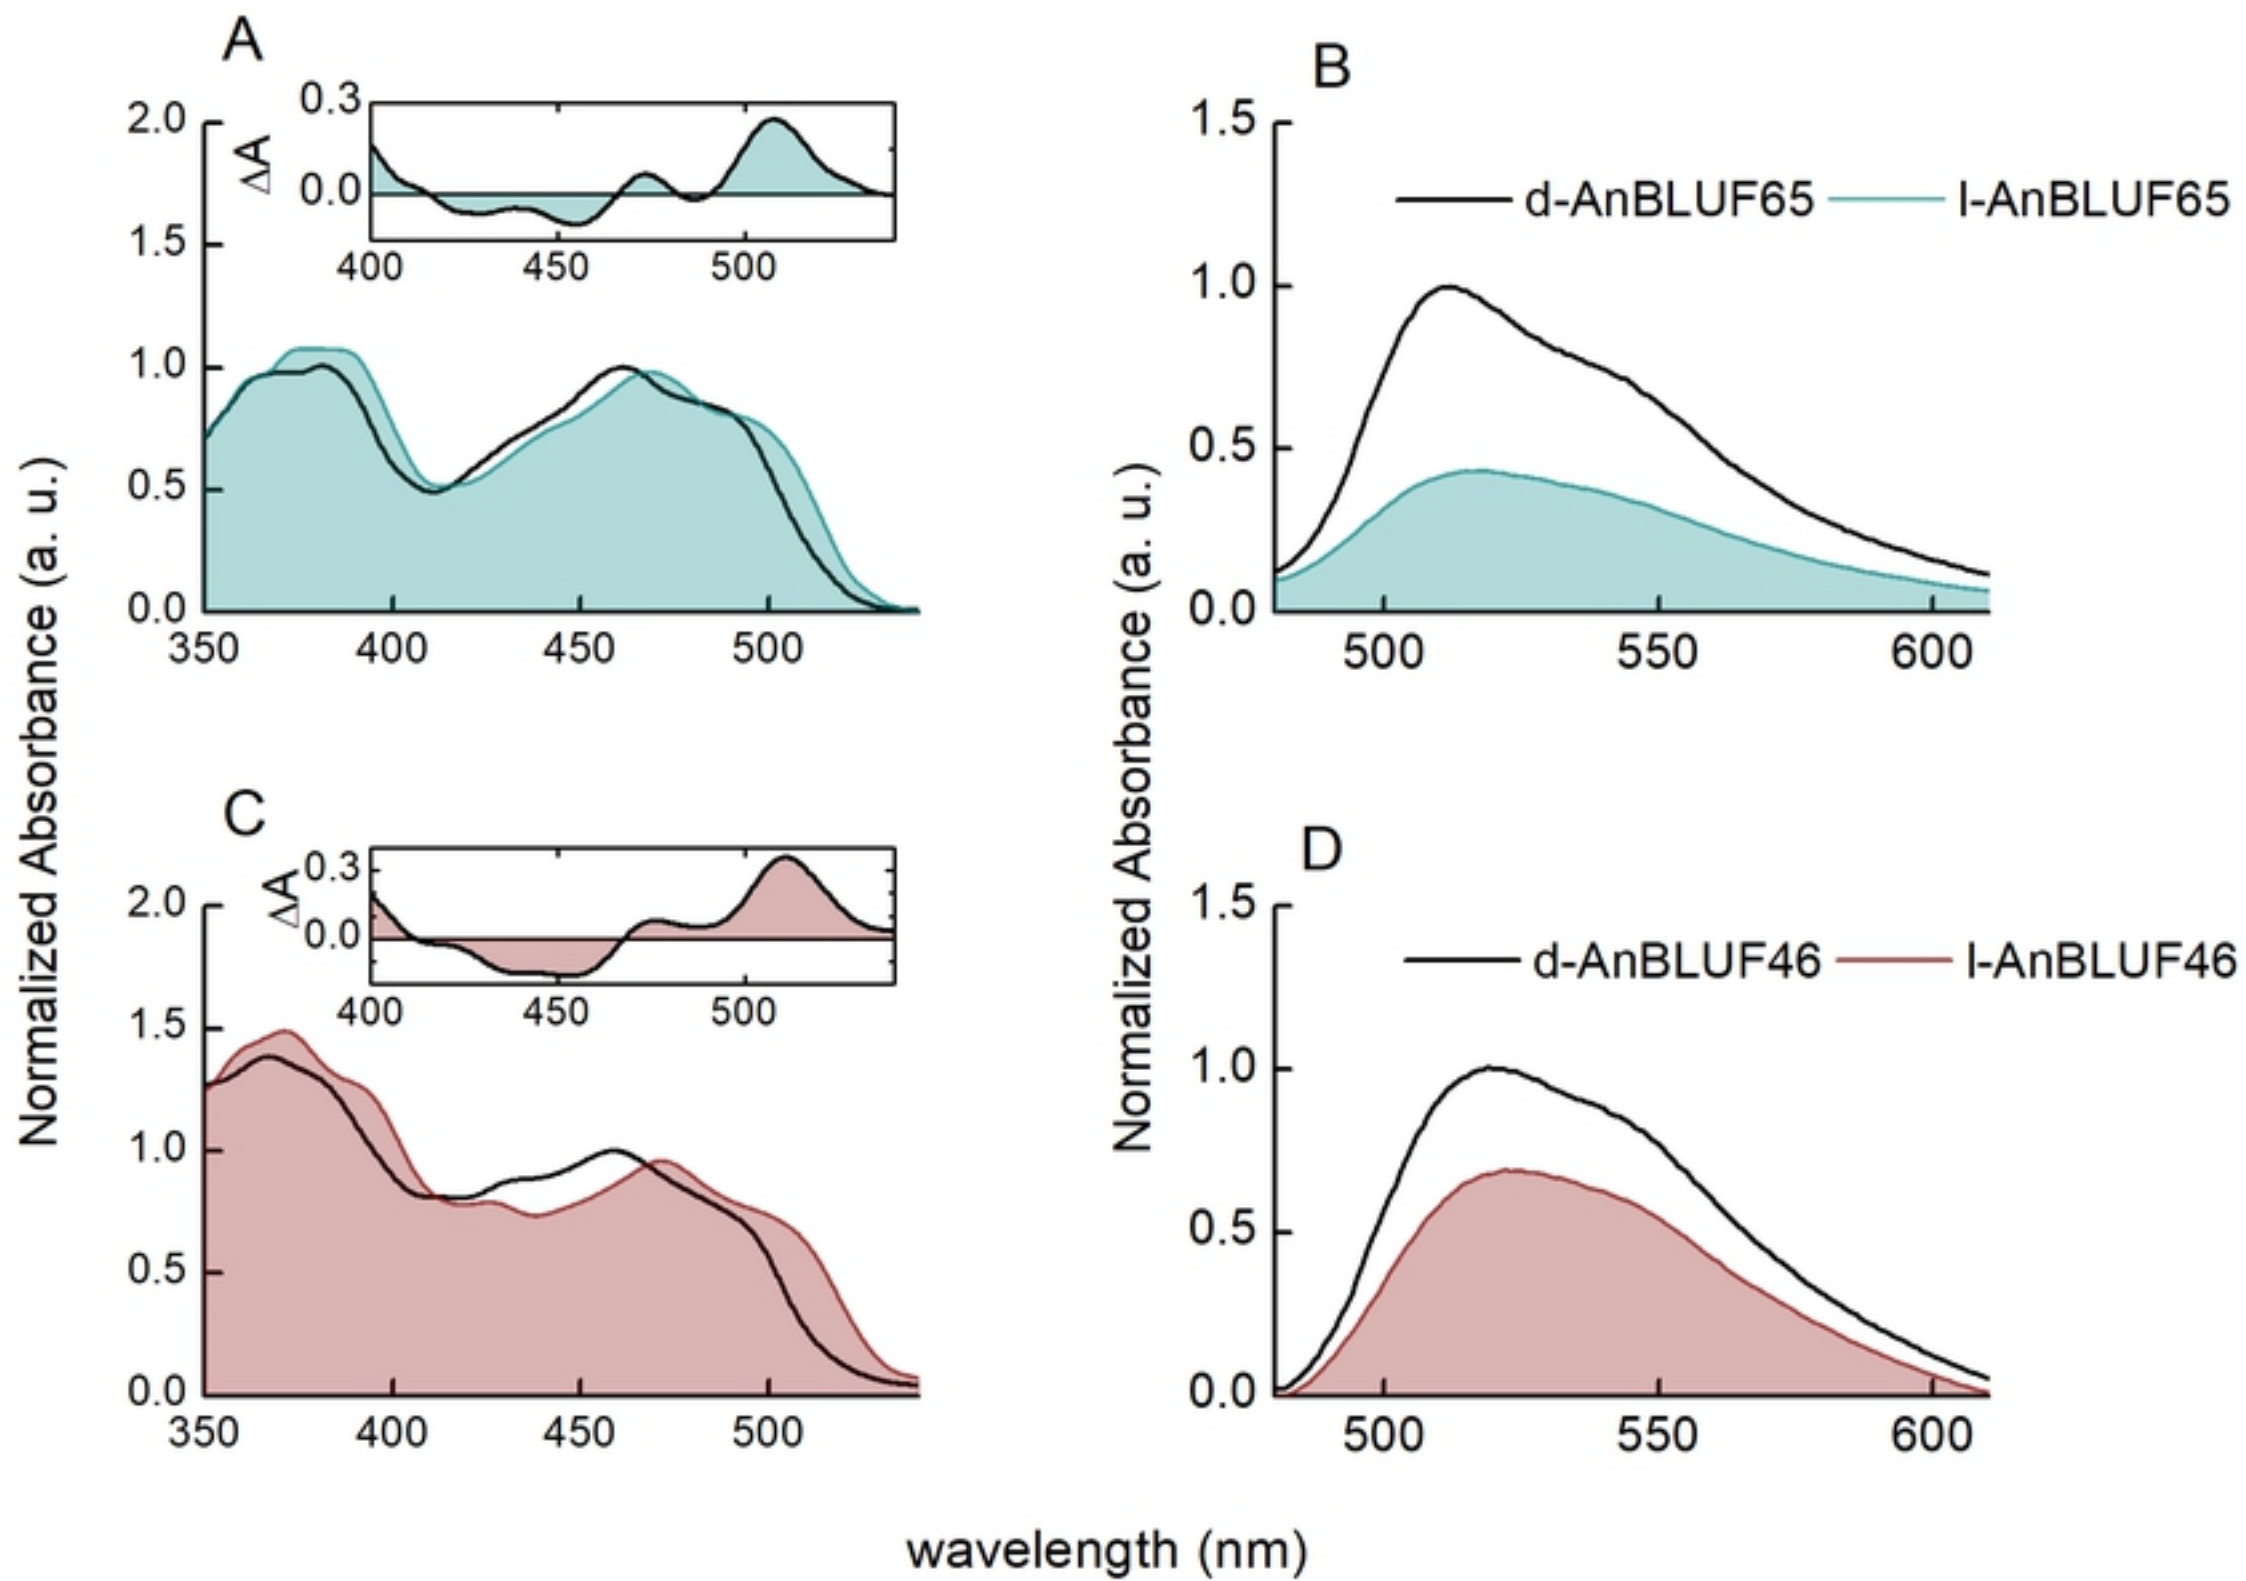

Figure



**A**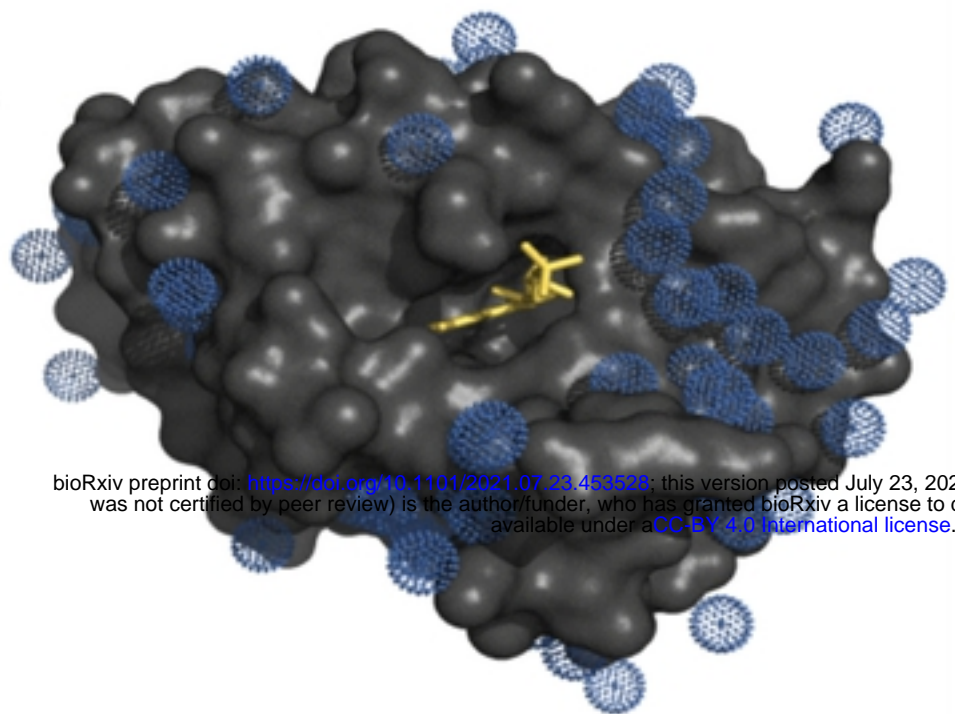**B**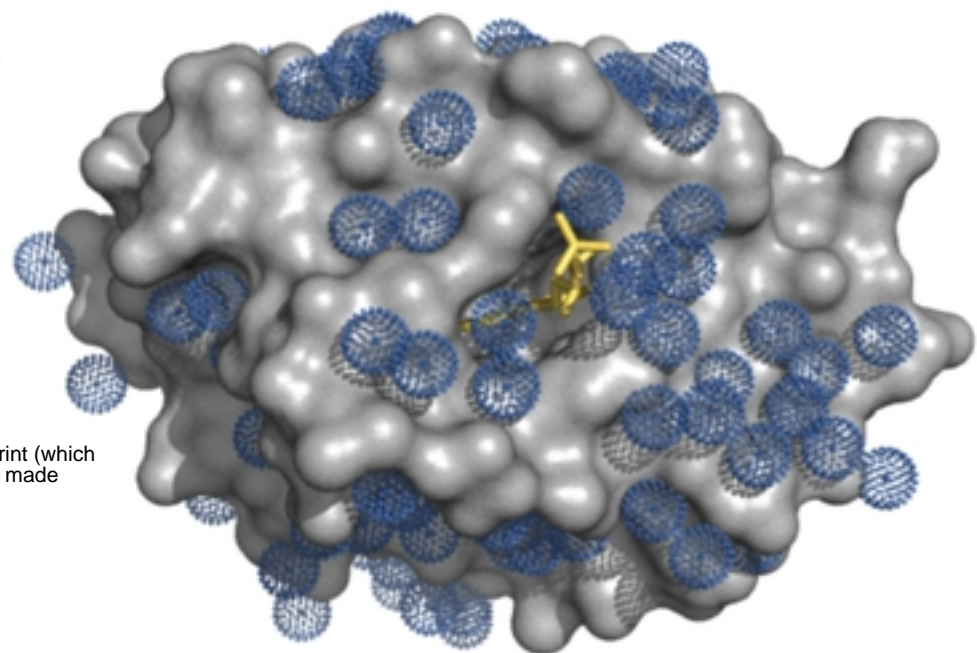**C**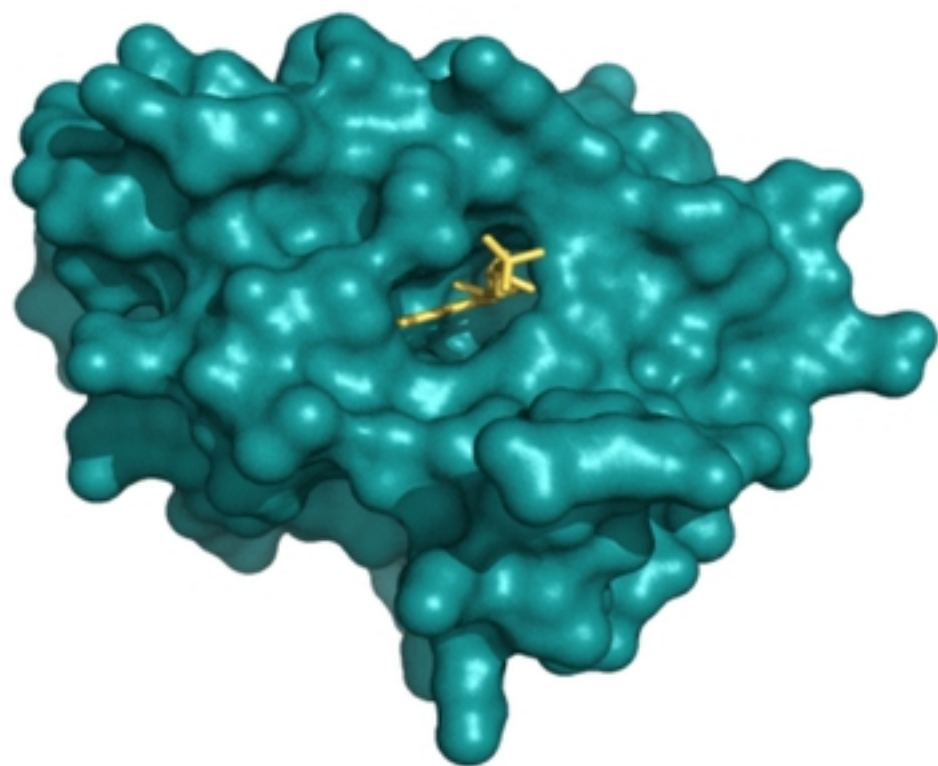**D**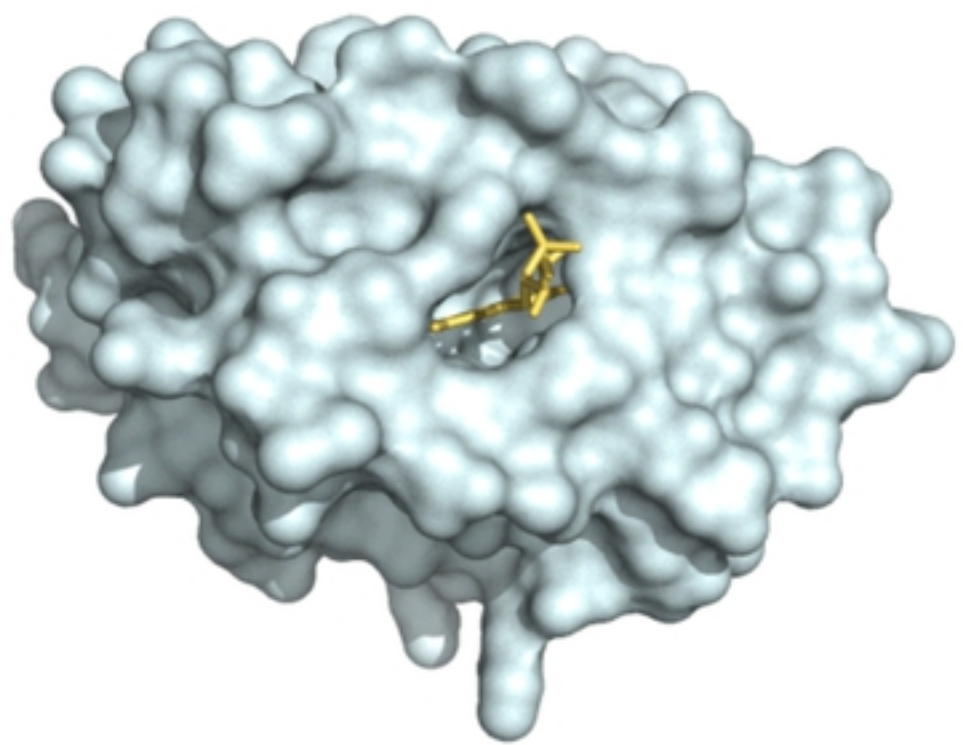**E**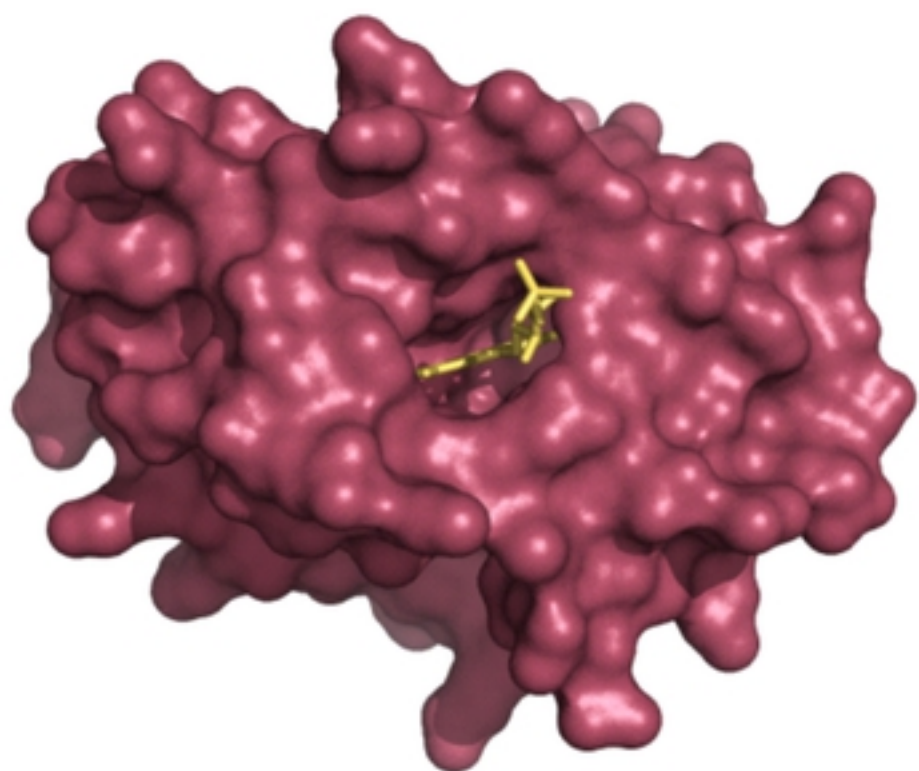**F**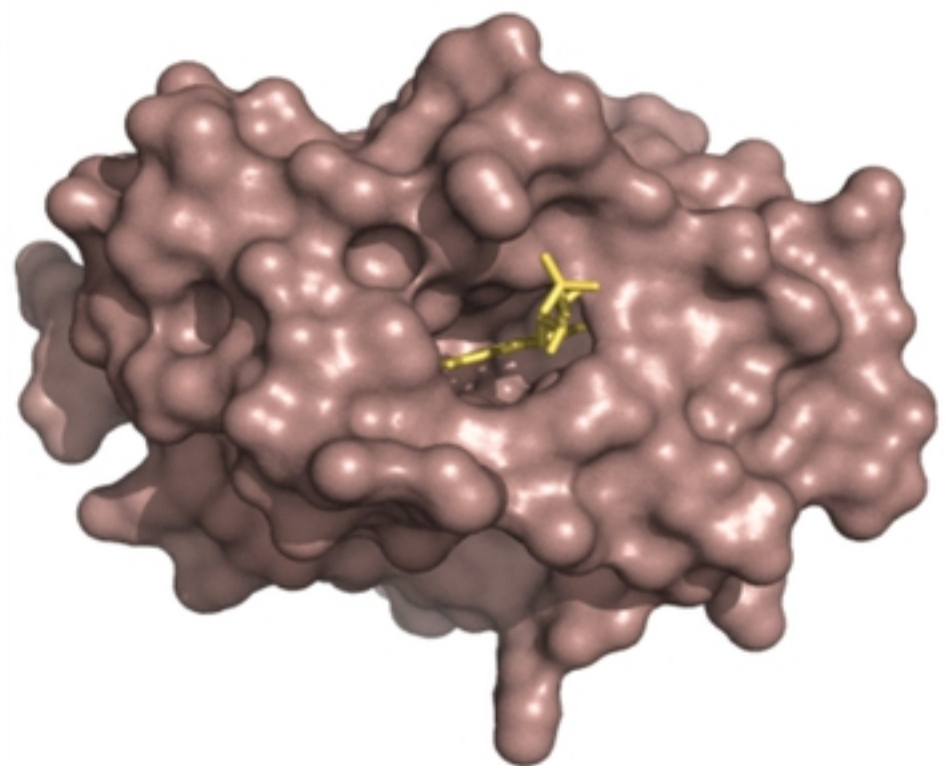**Figure**

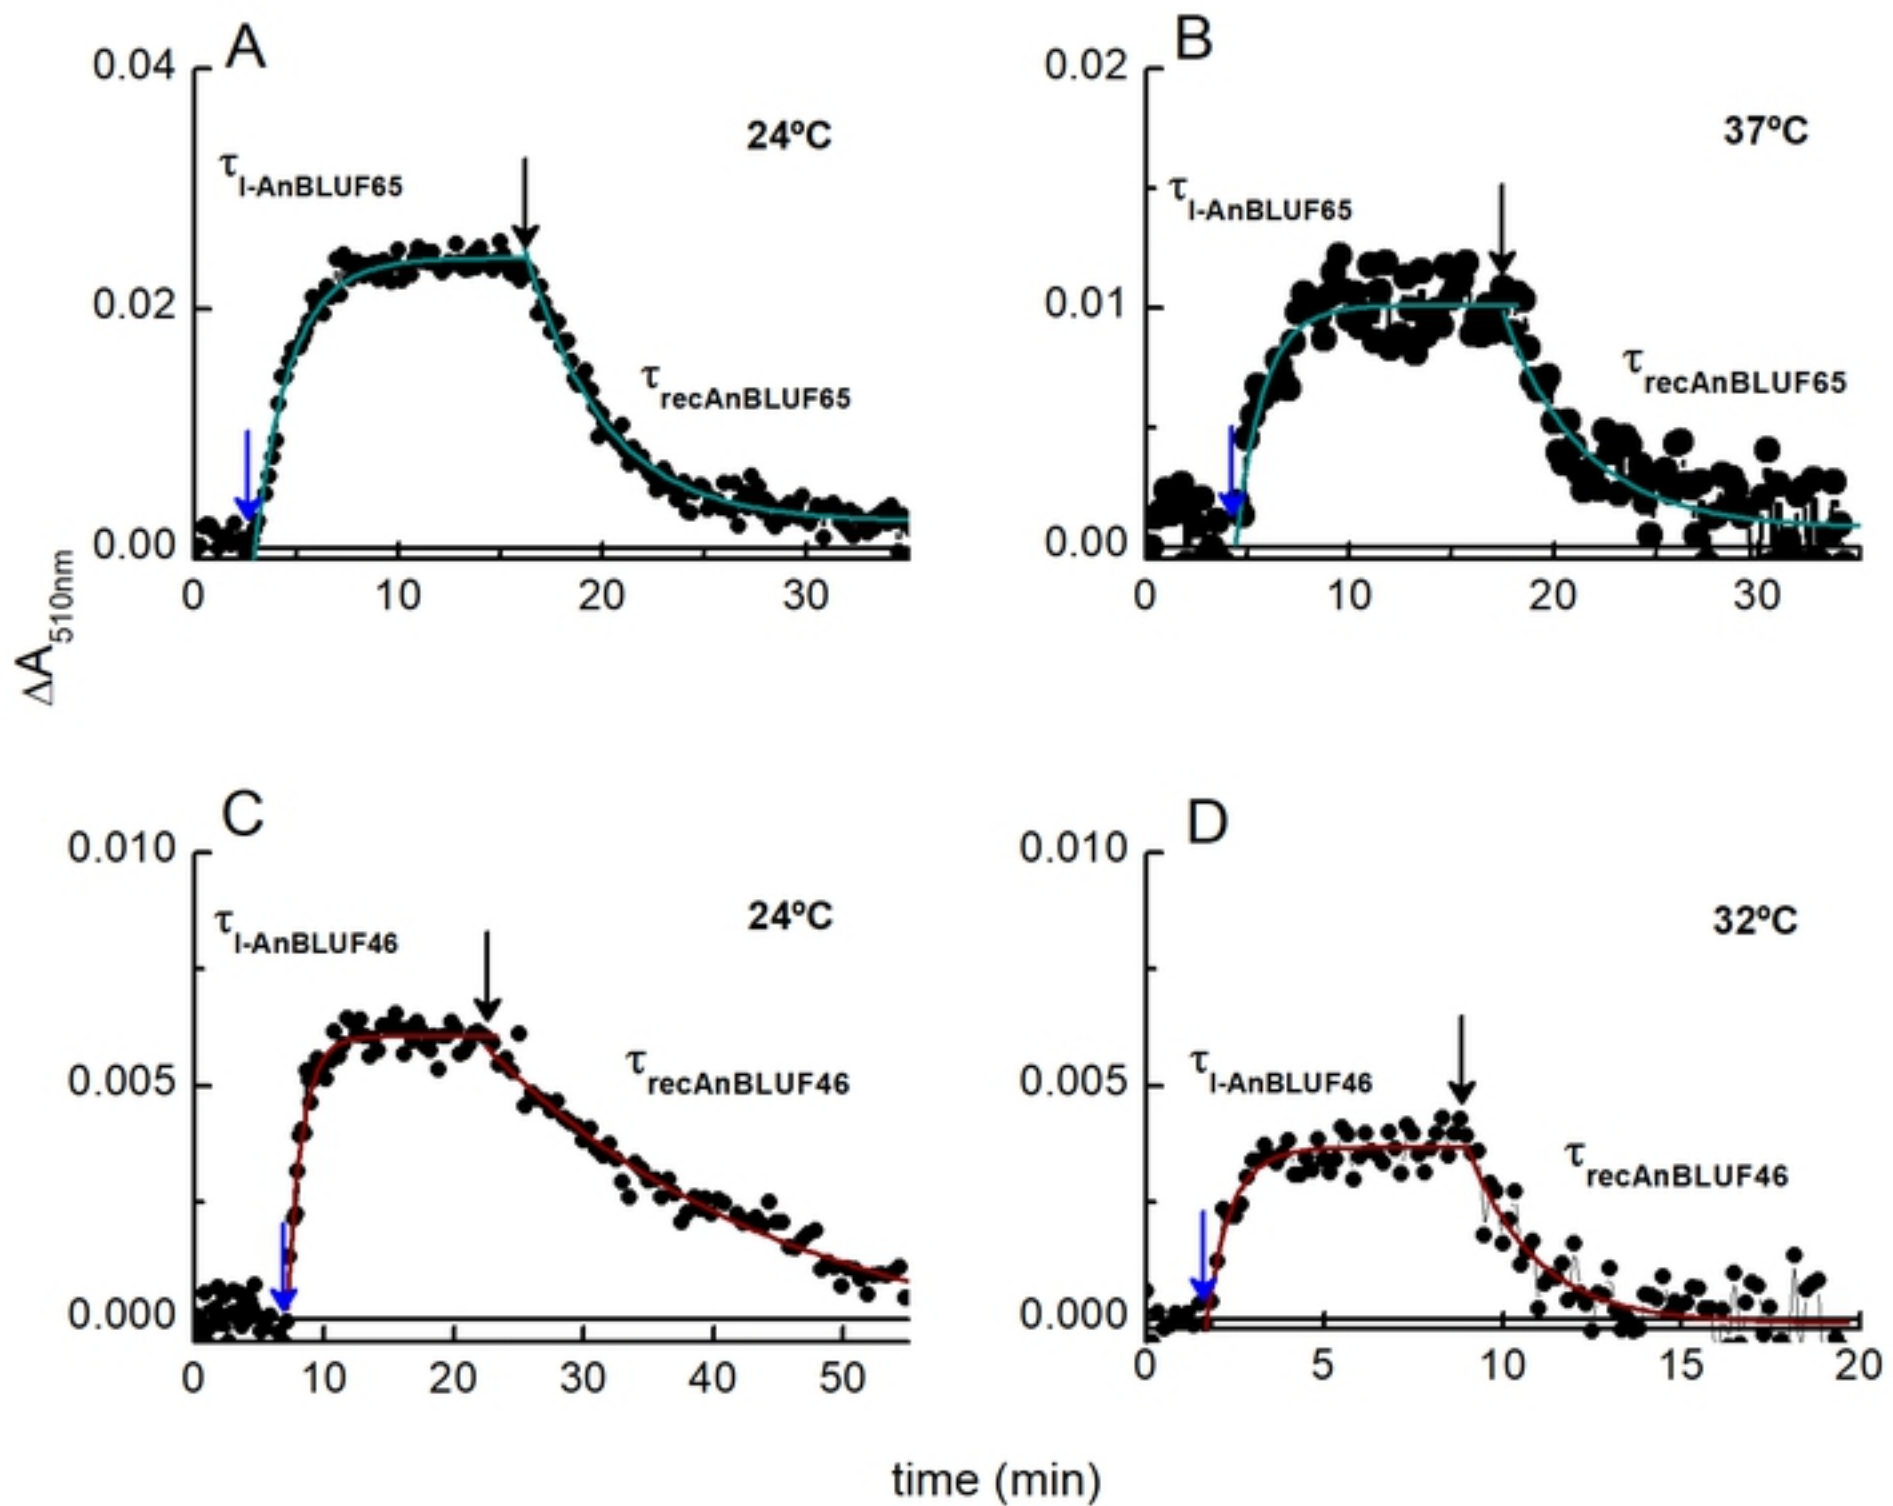

Figure



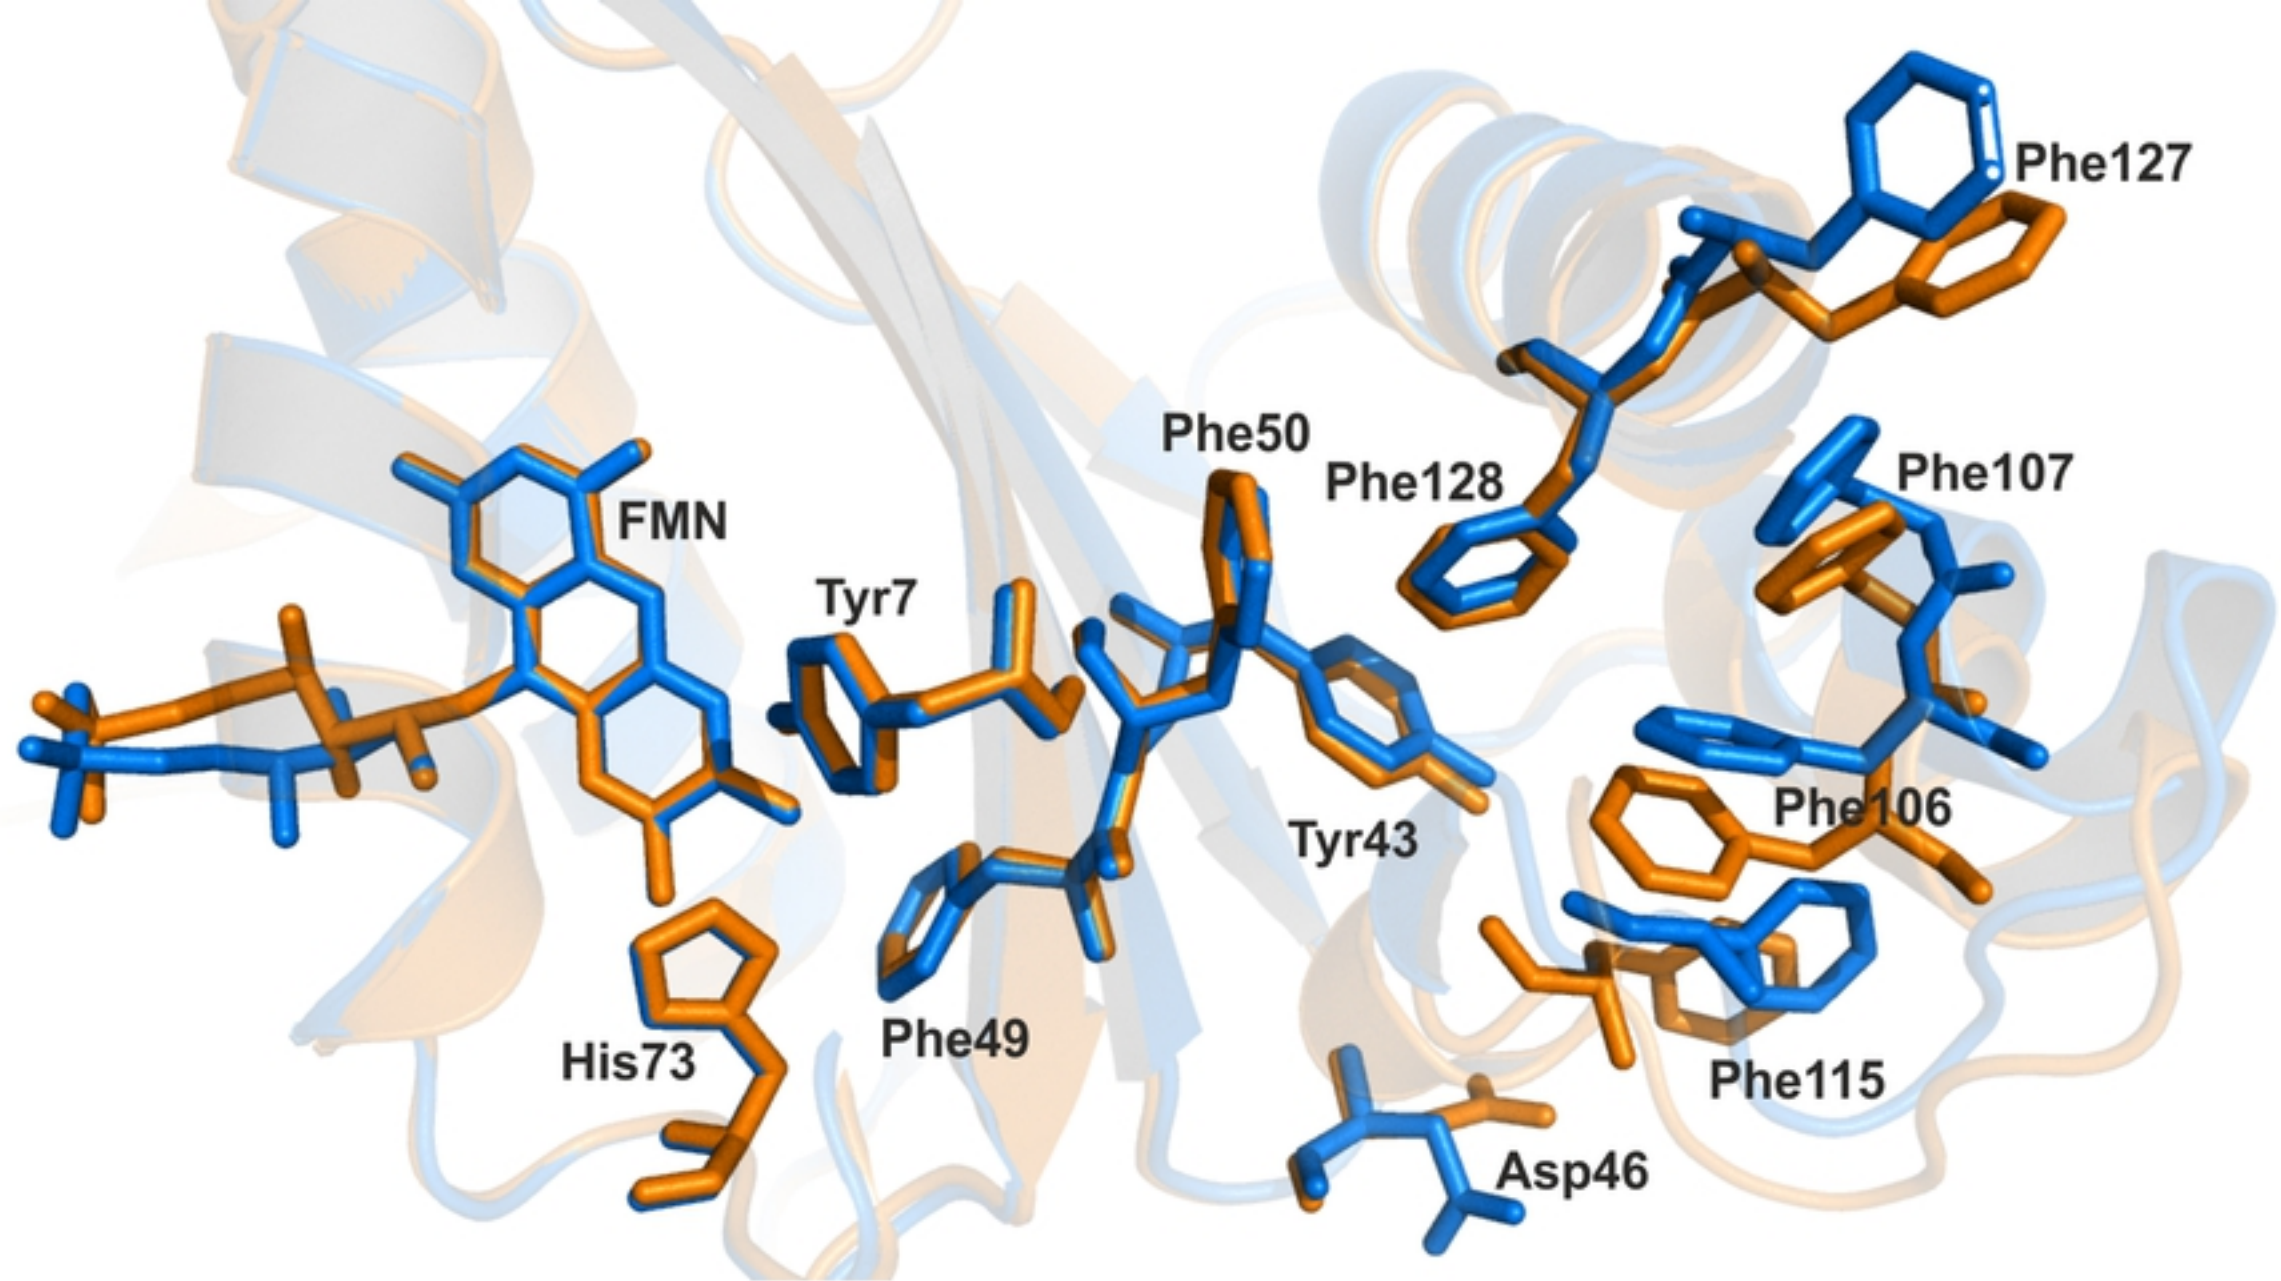

Figure



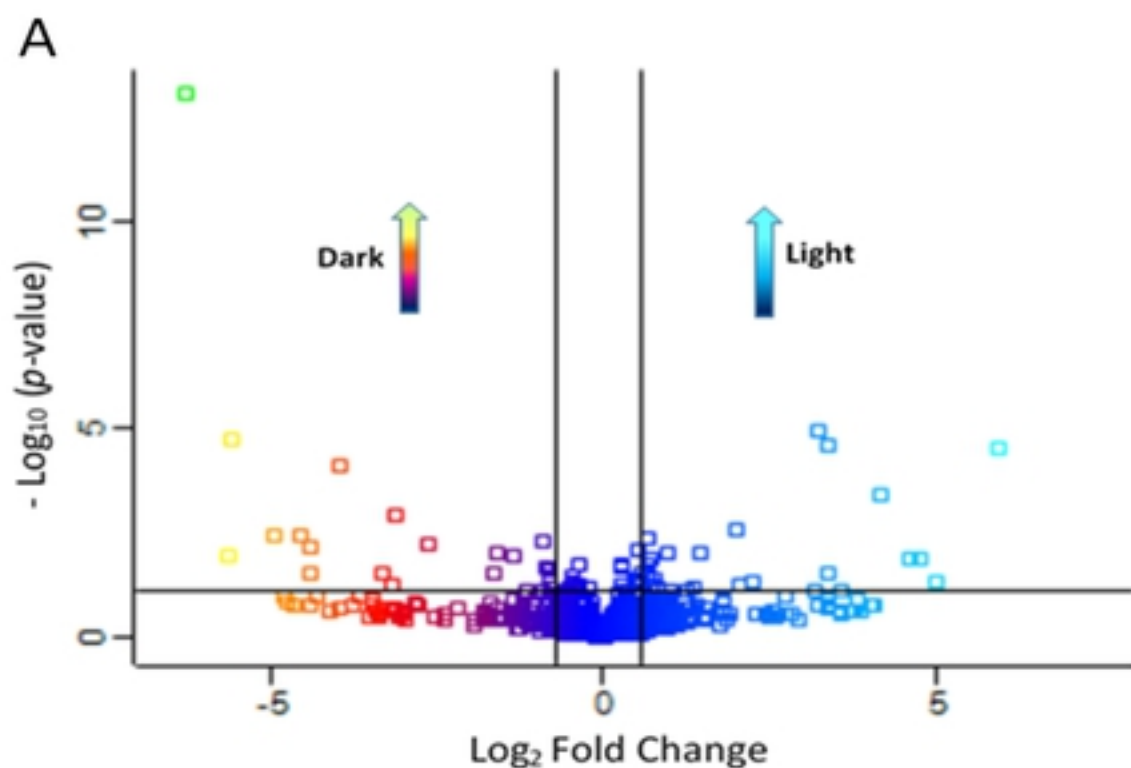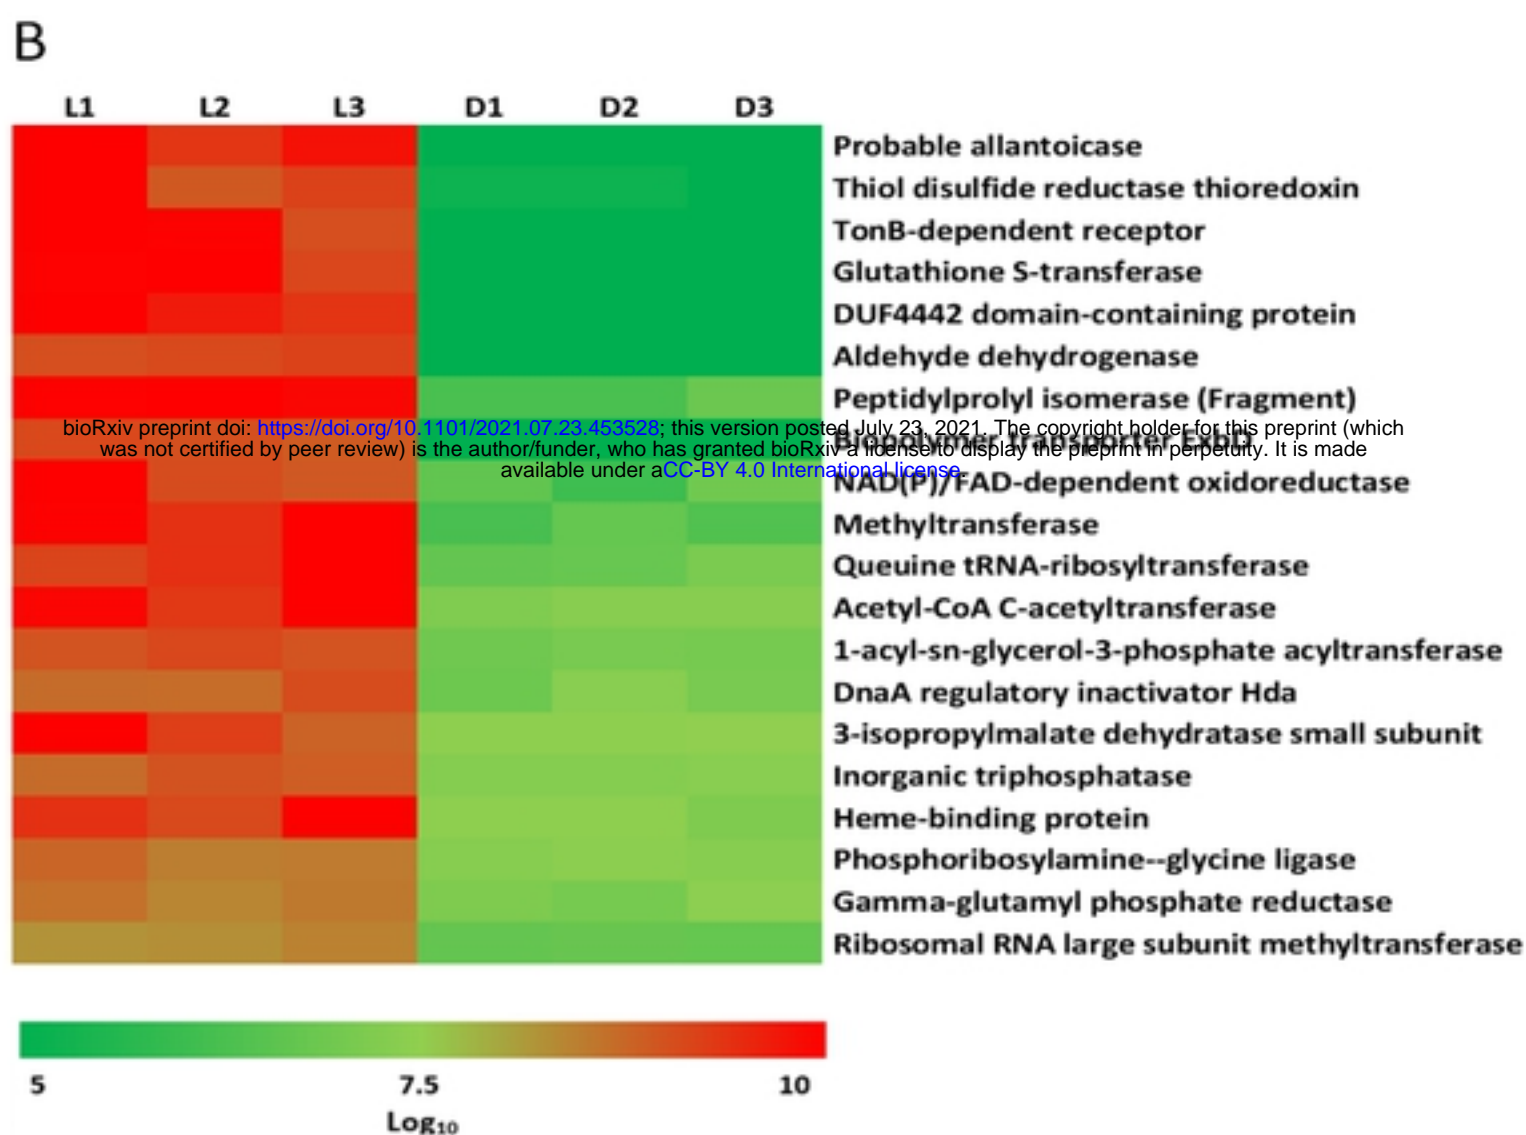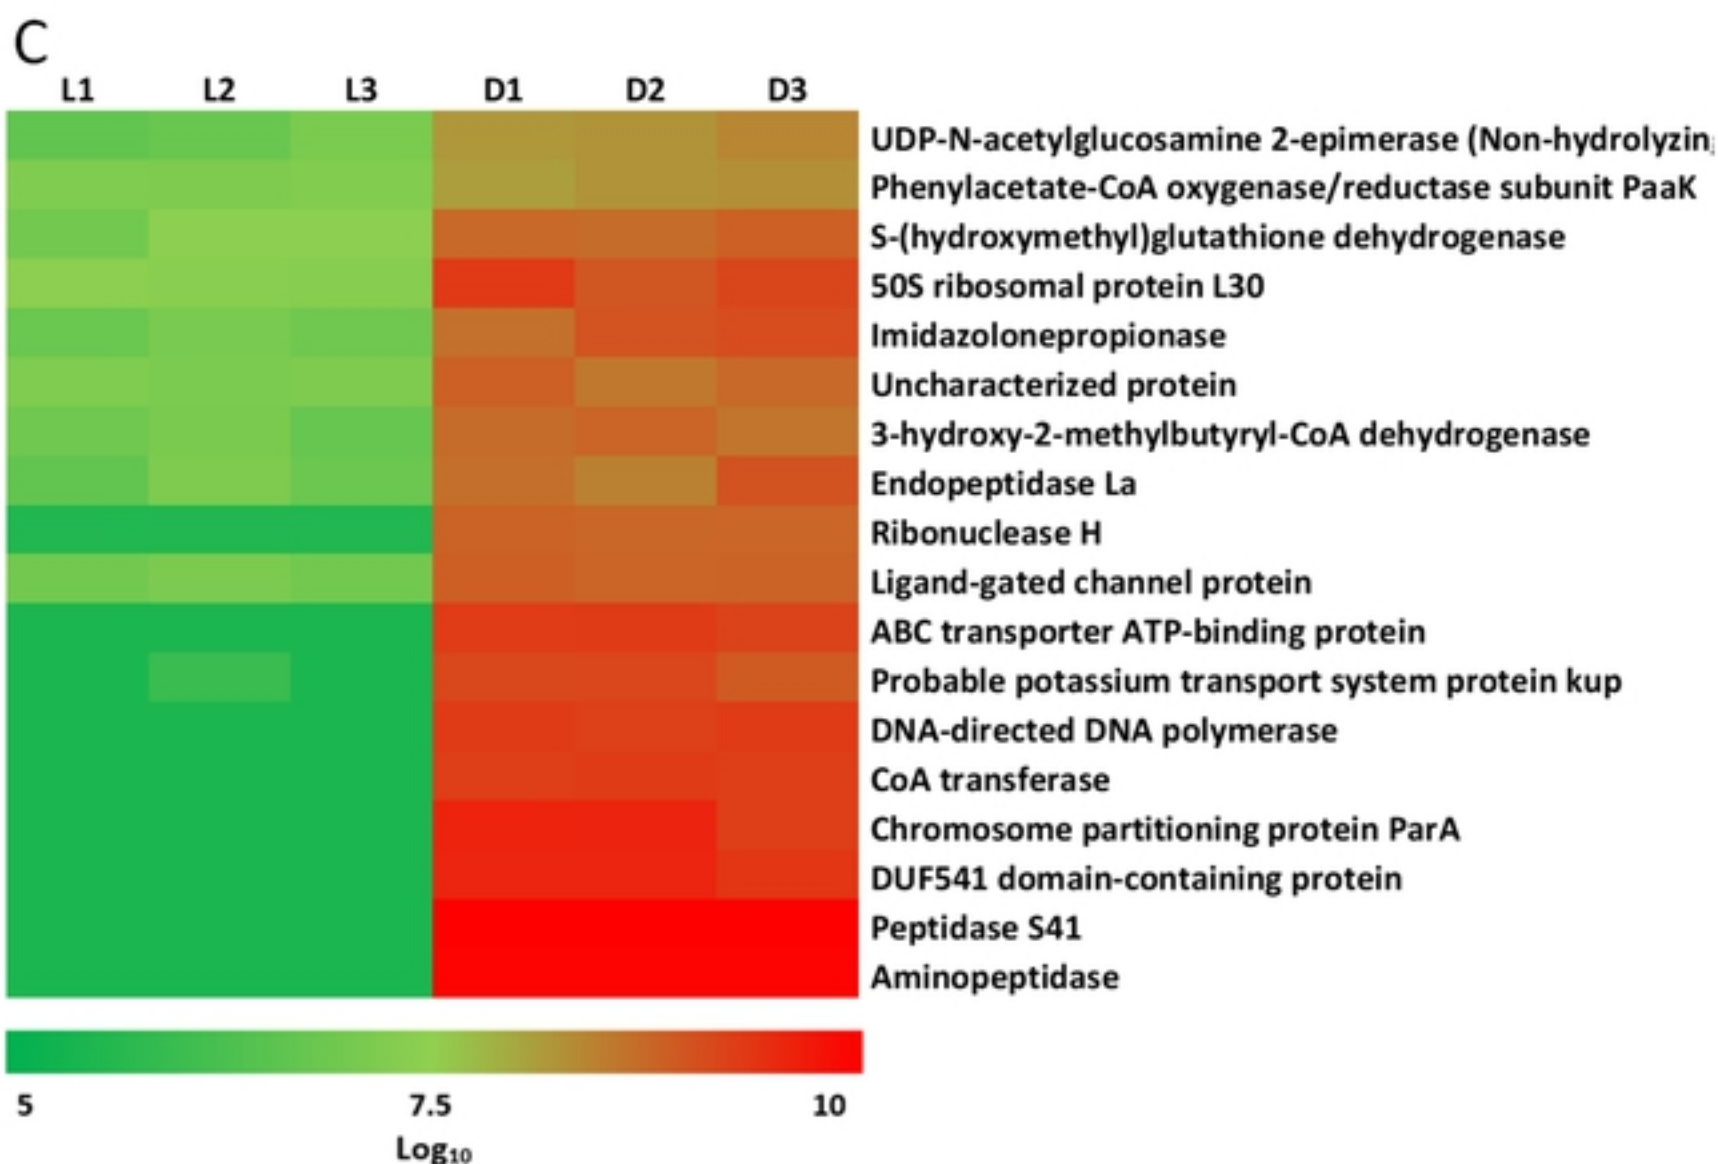

Figure

## BIOLOGICAL PROCESS

L

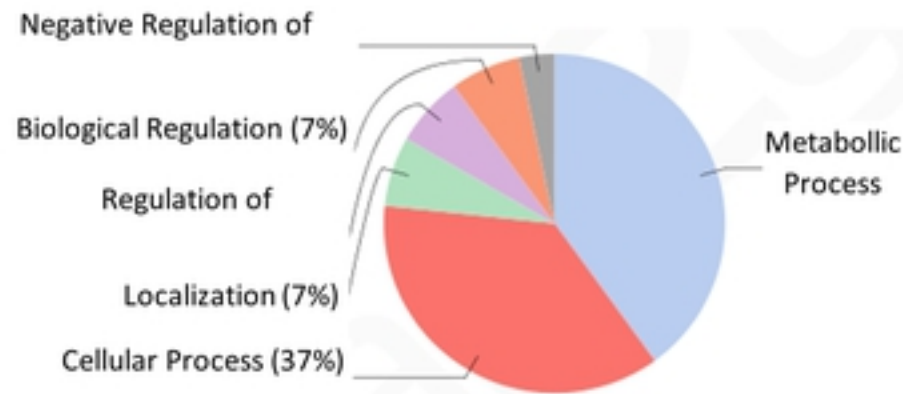

D

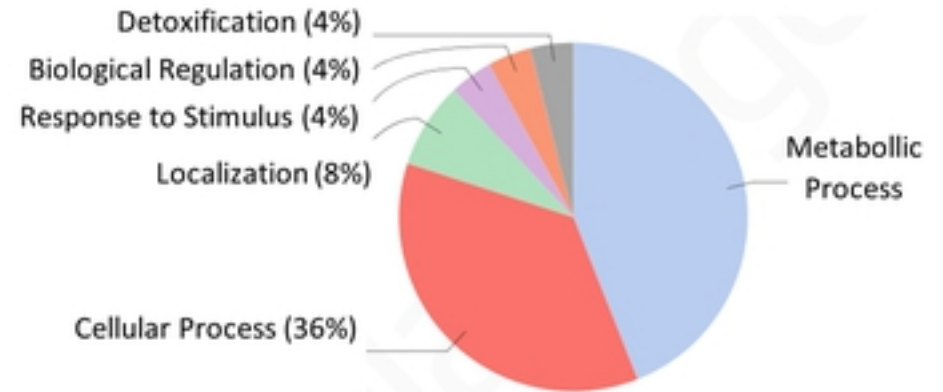

## MOLECULAR FUNCTION

L

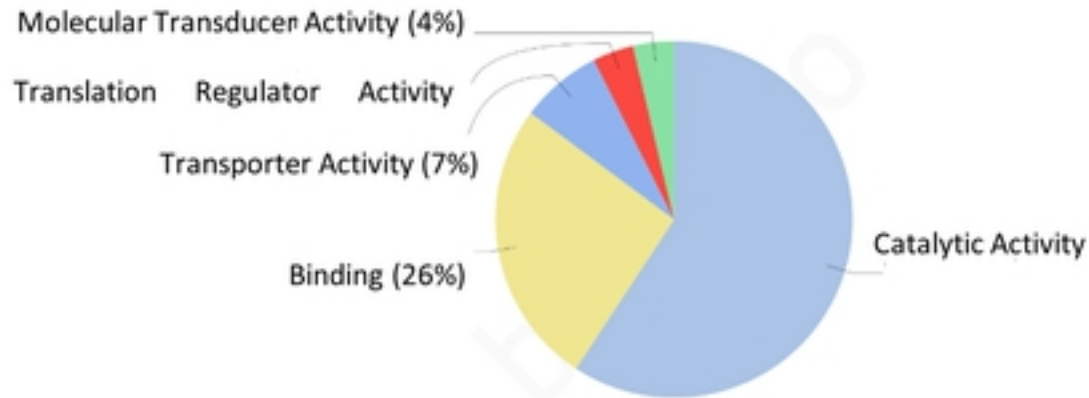

D

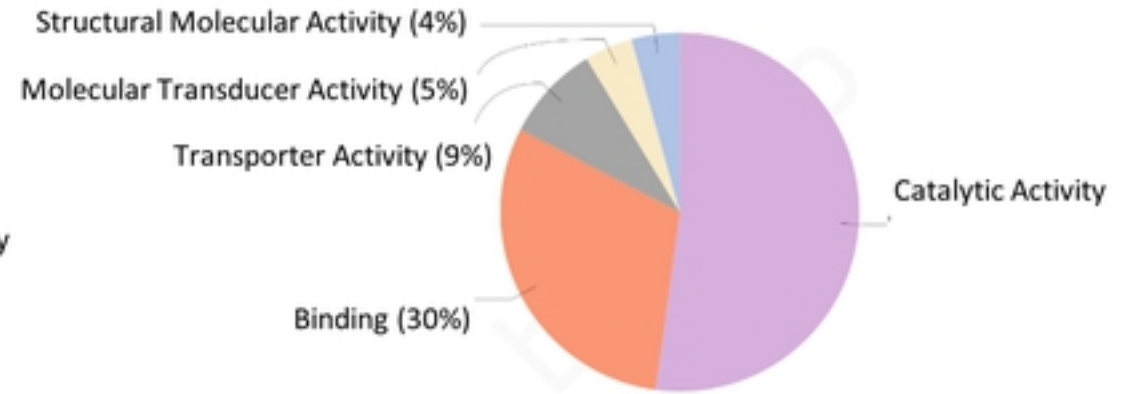

## CELLULAR COMPONENT

L

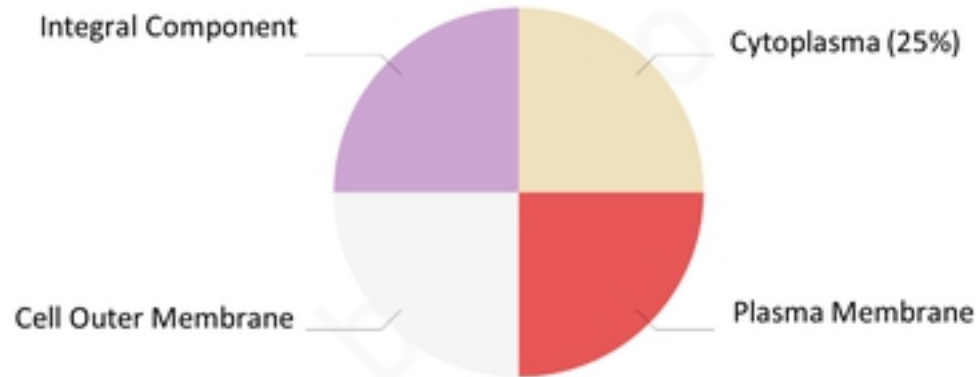

D

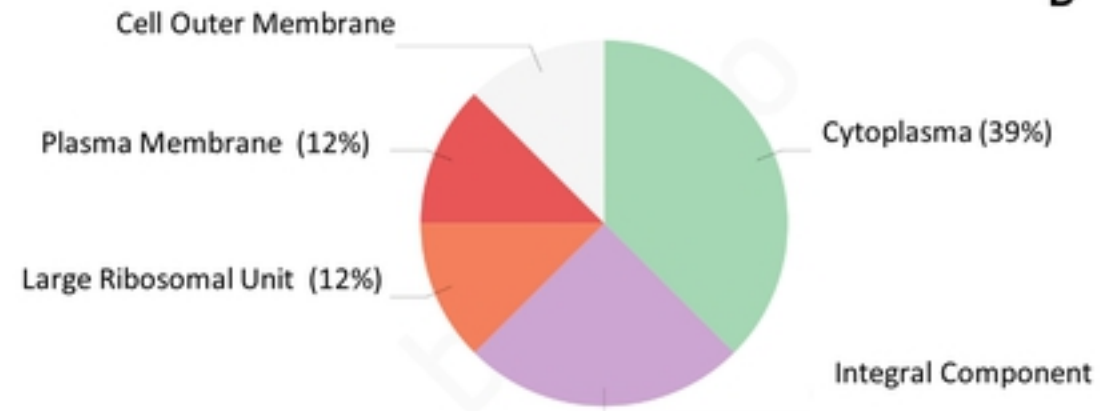

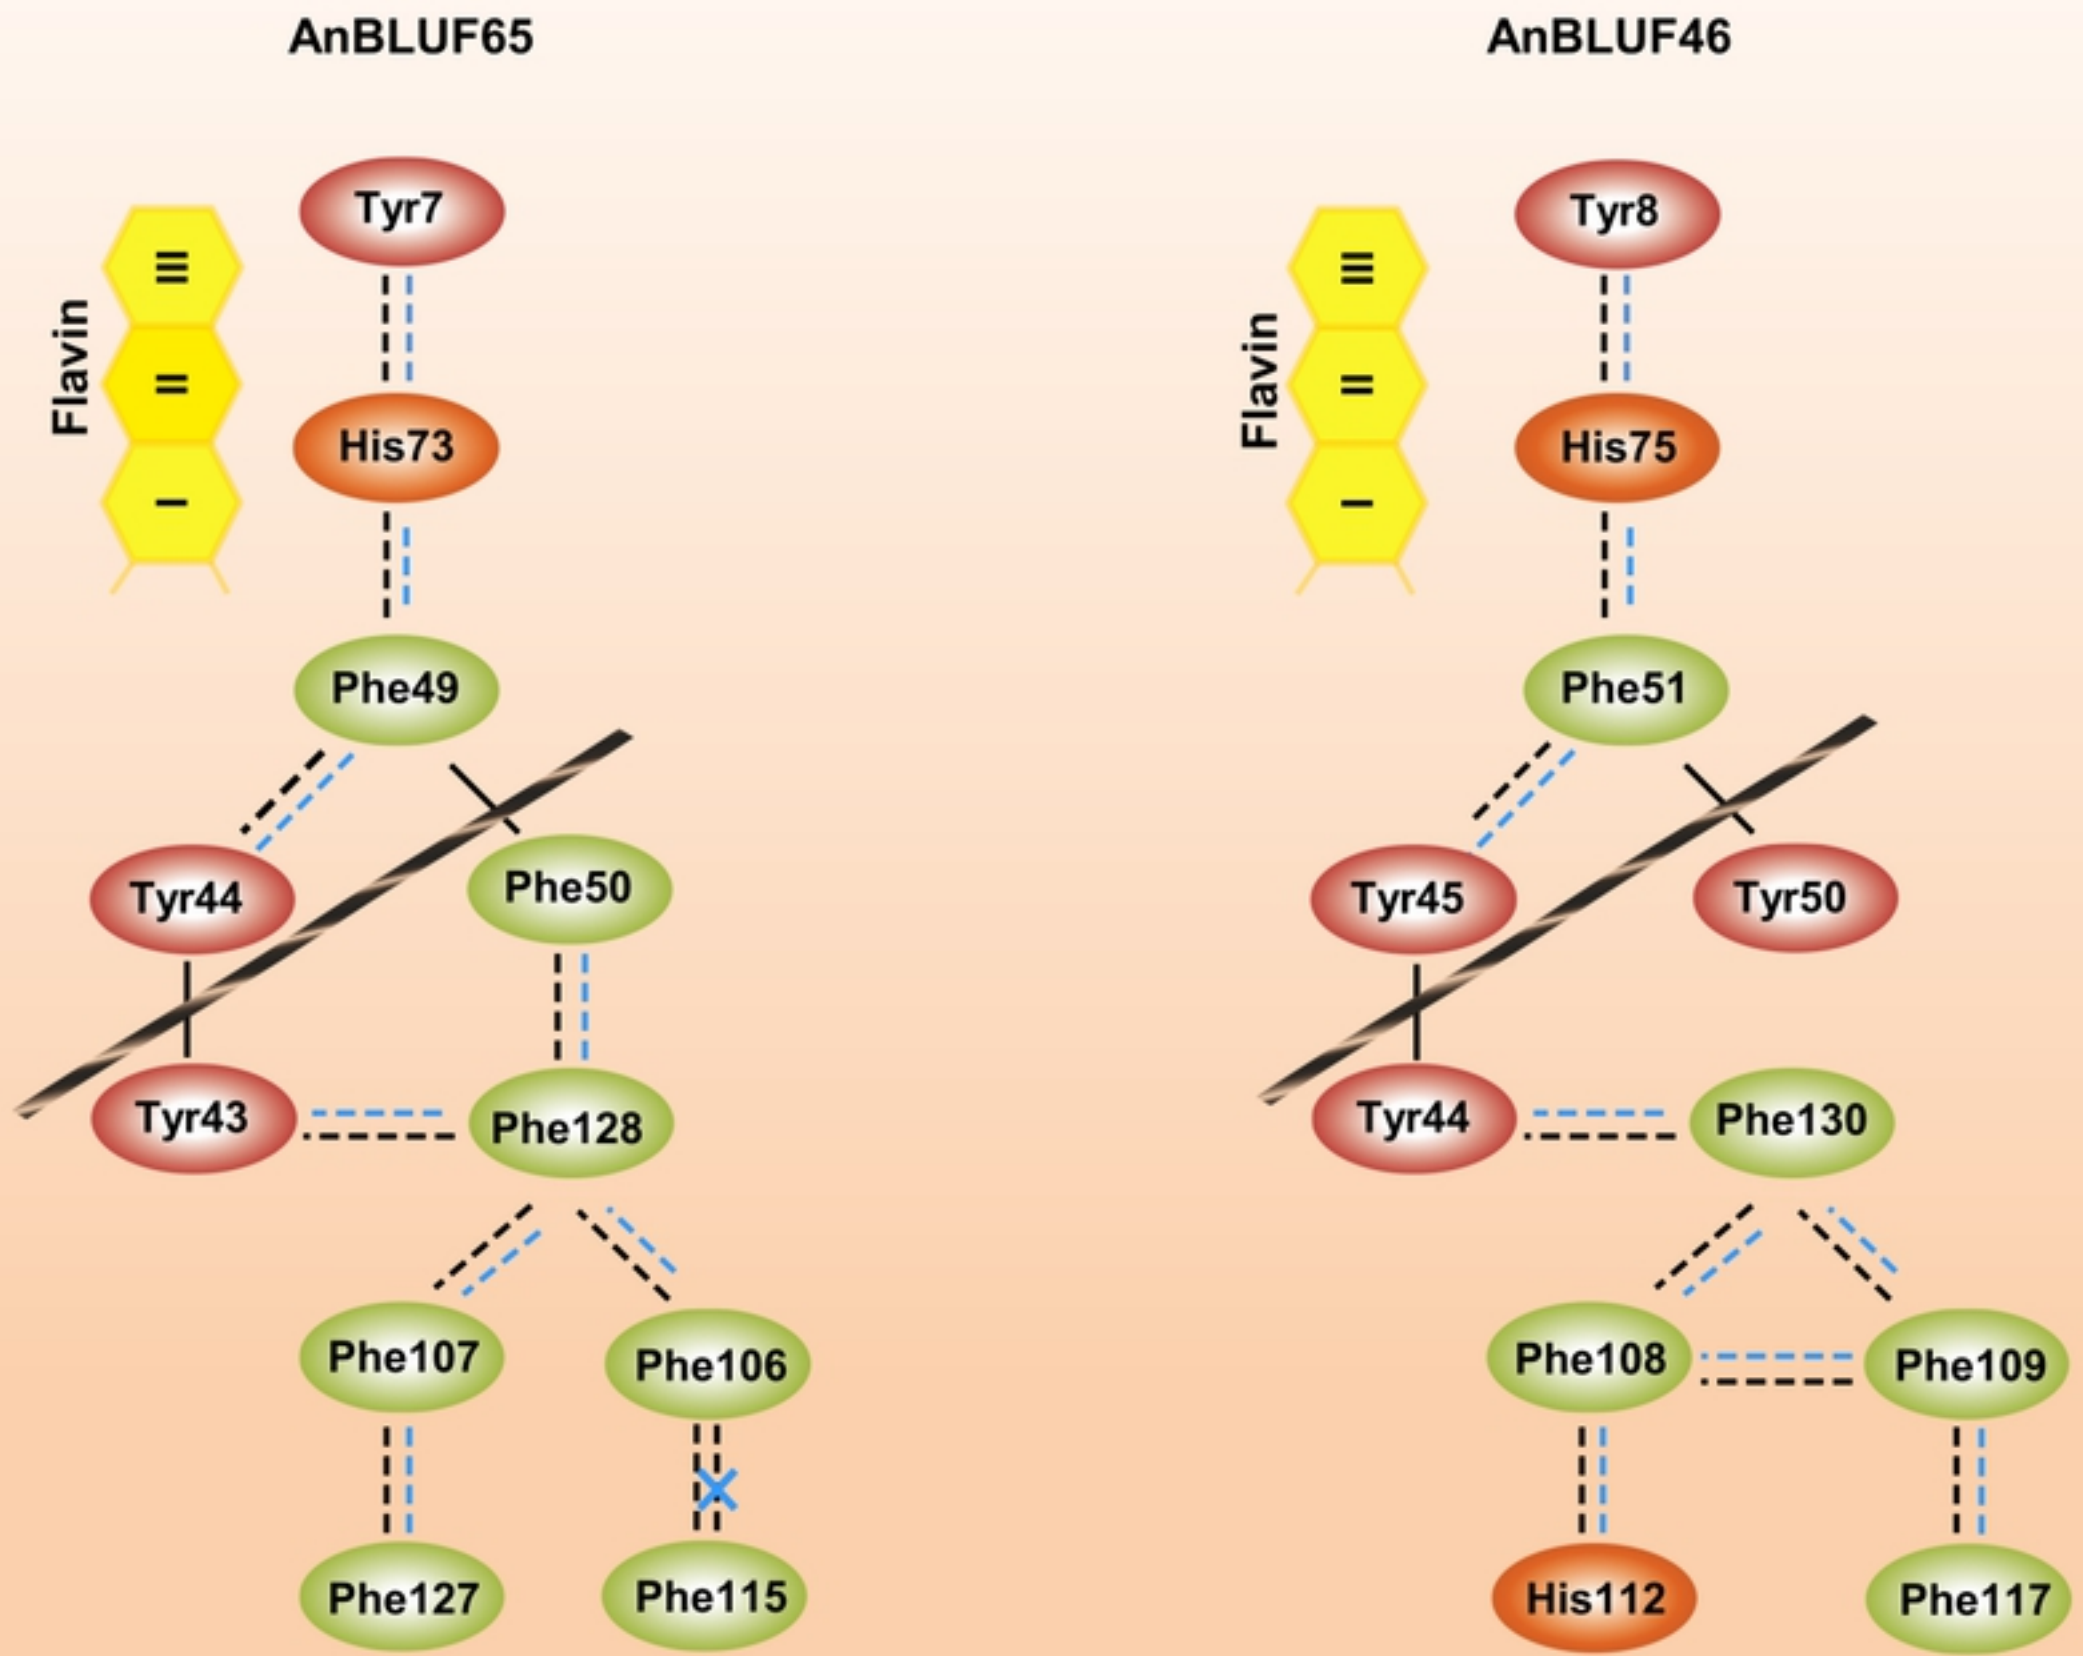

Figure



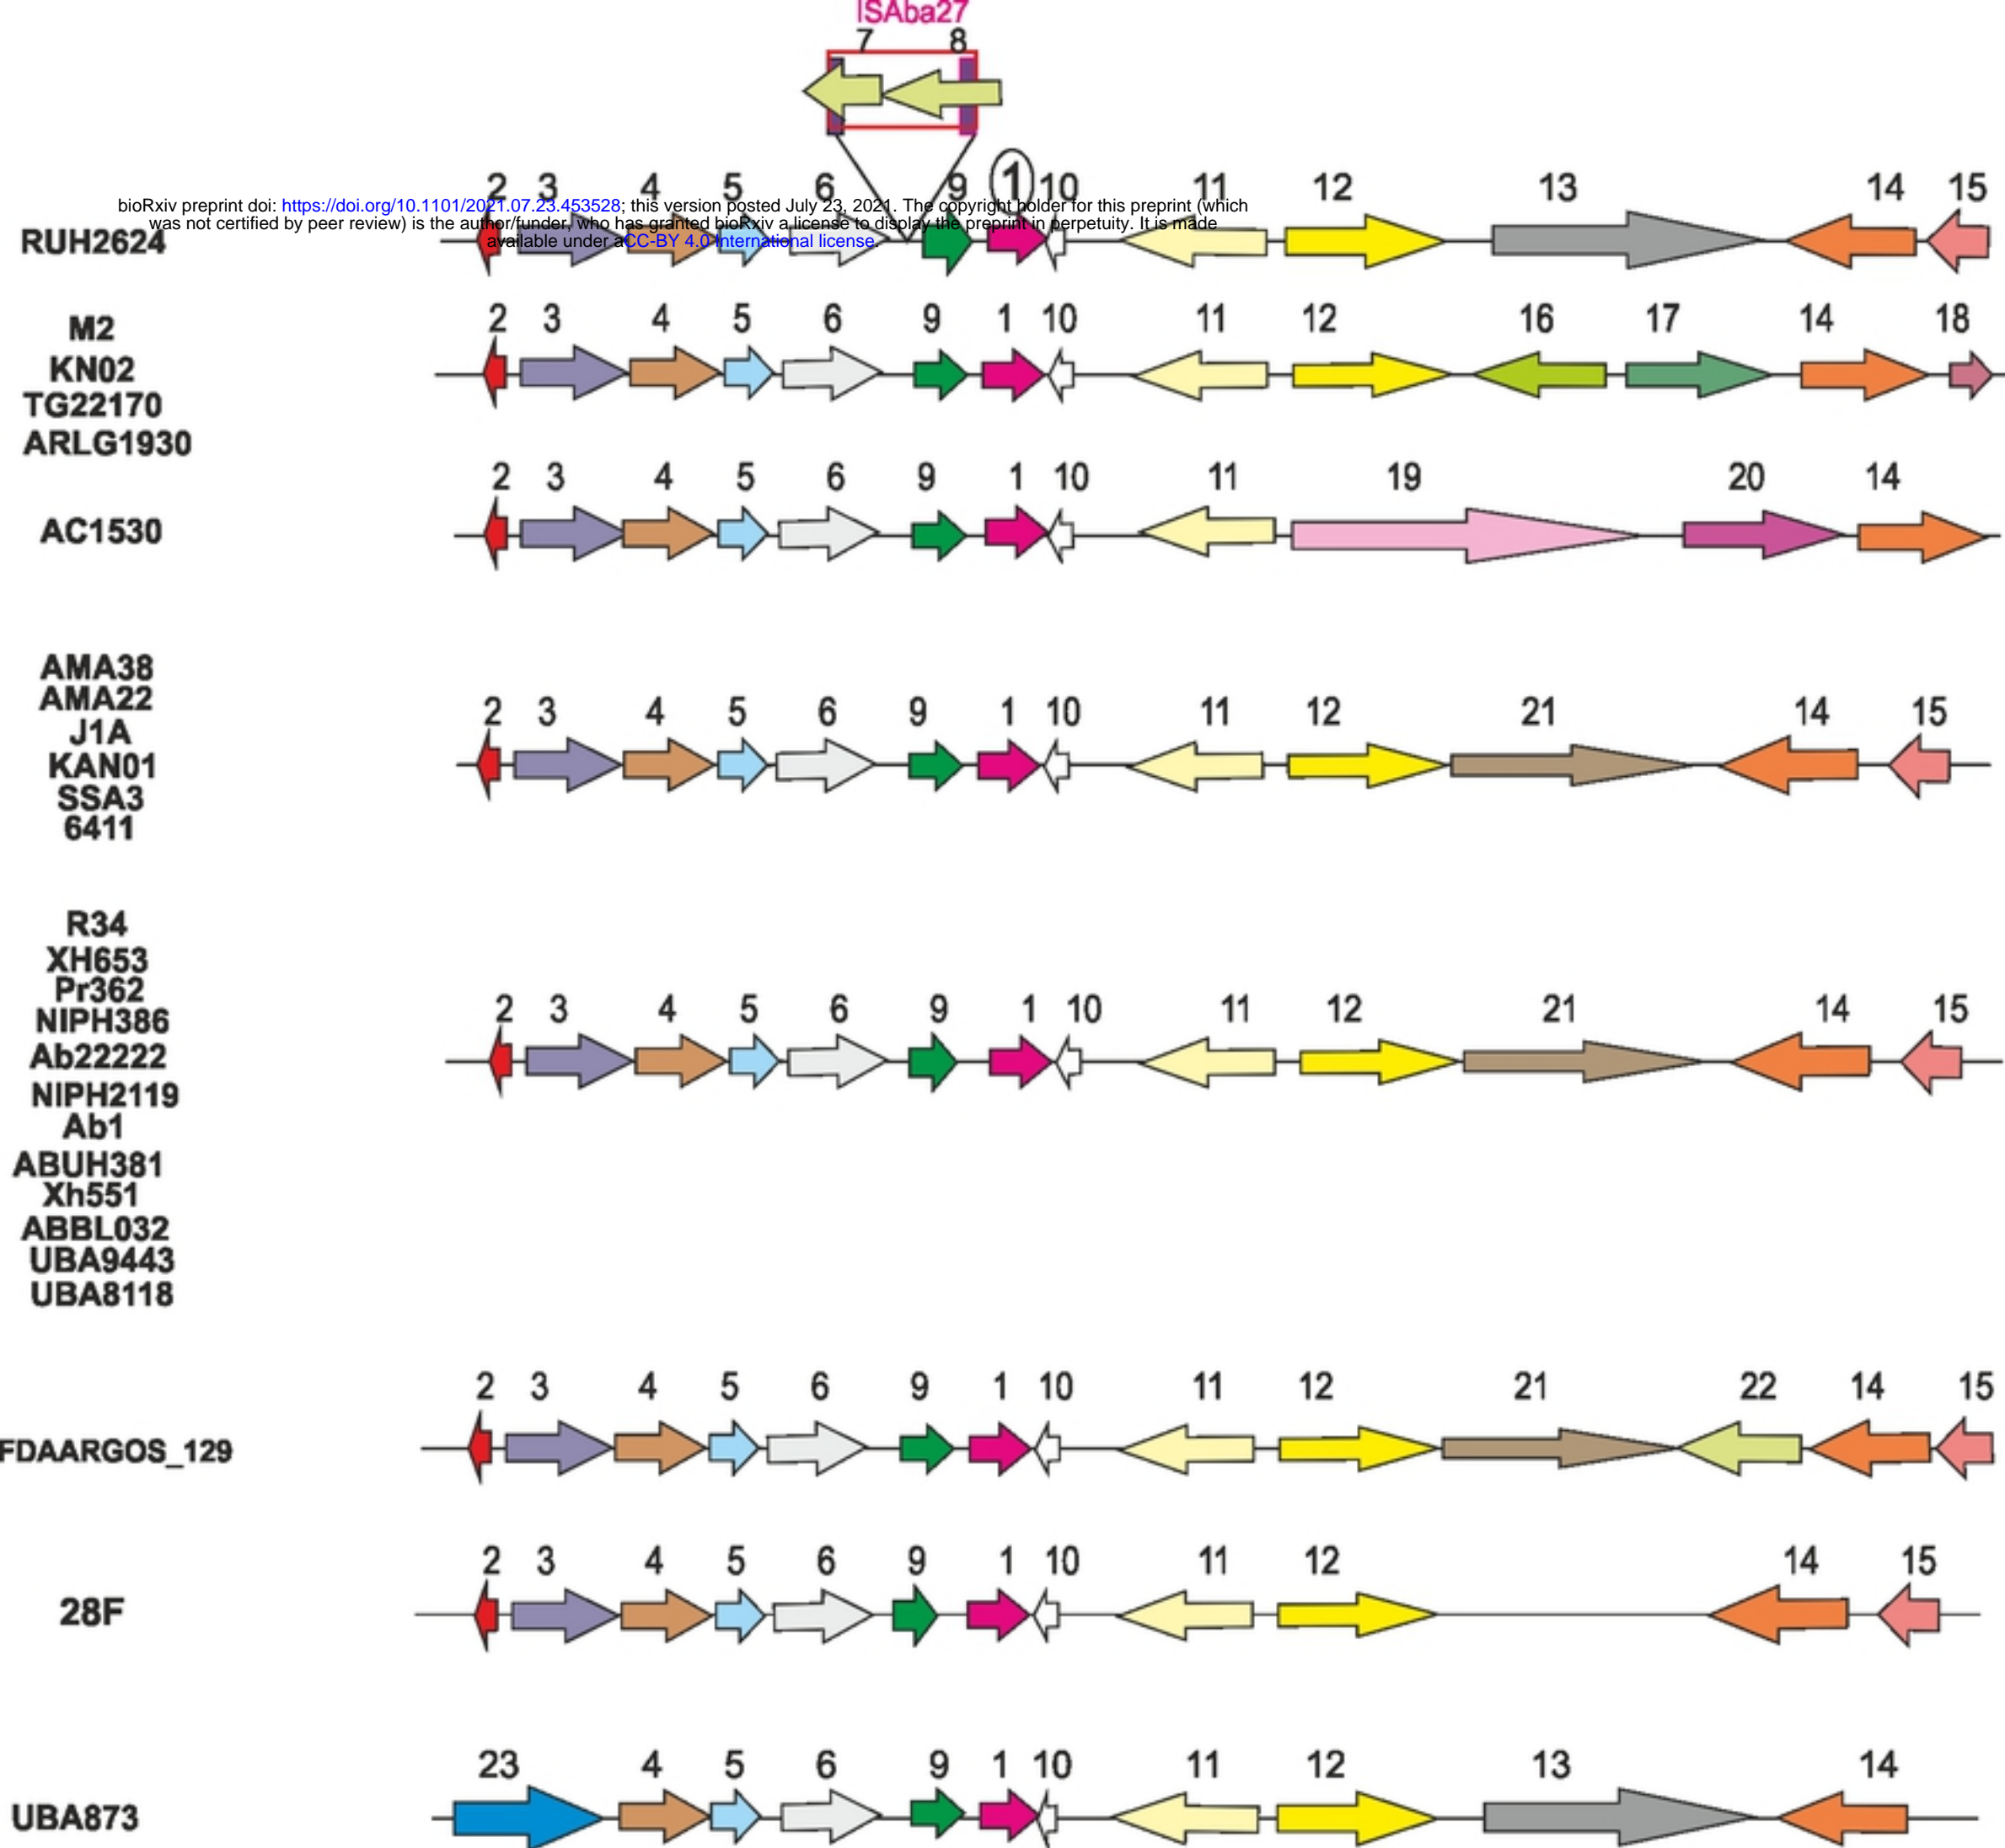

Figure

**KUH2624**

**ABUH381**

**PR362**

**UBA8118**

**KAN02**

**XH551**

**UBA9443**

**XH653**

**ABBL032**

**Ab22222**

**28F**

**M2**

**AC1530**

**J1A**

**FDAARGOS\_129**

**Ab1**

**KNA01**

**NIPH2119**

**6411**

**SSA3**

**NIPH386**

**AMA38**

**ARLG1930**

**AMA22**

**Figure**

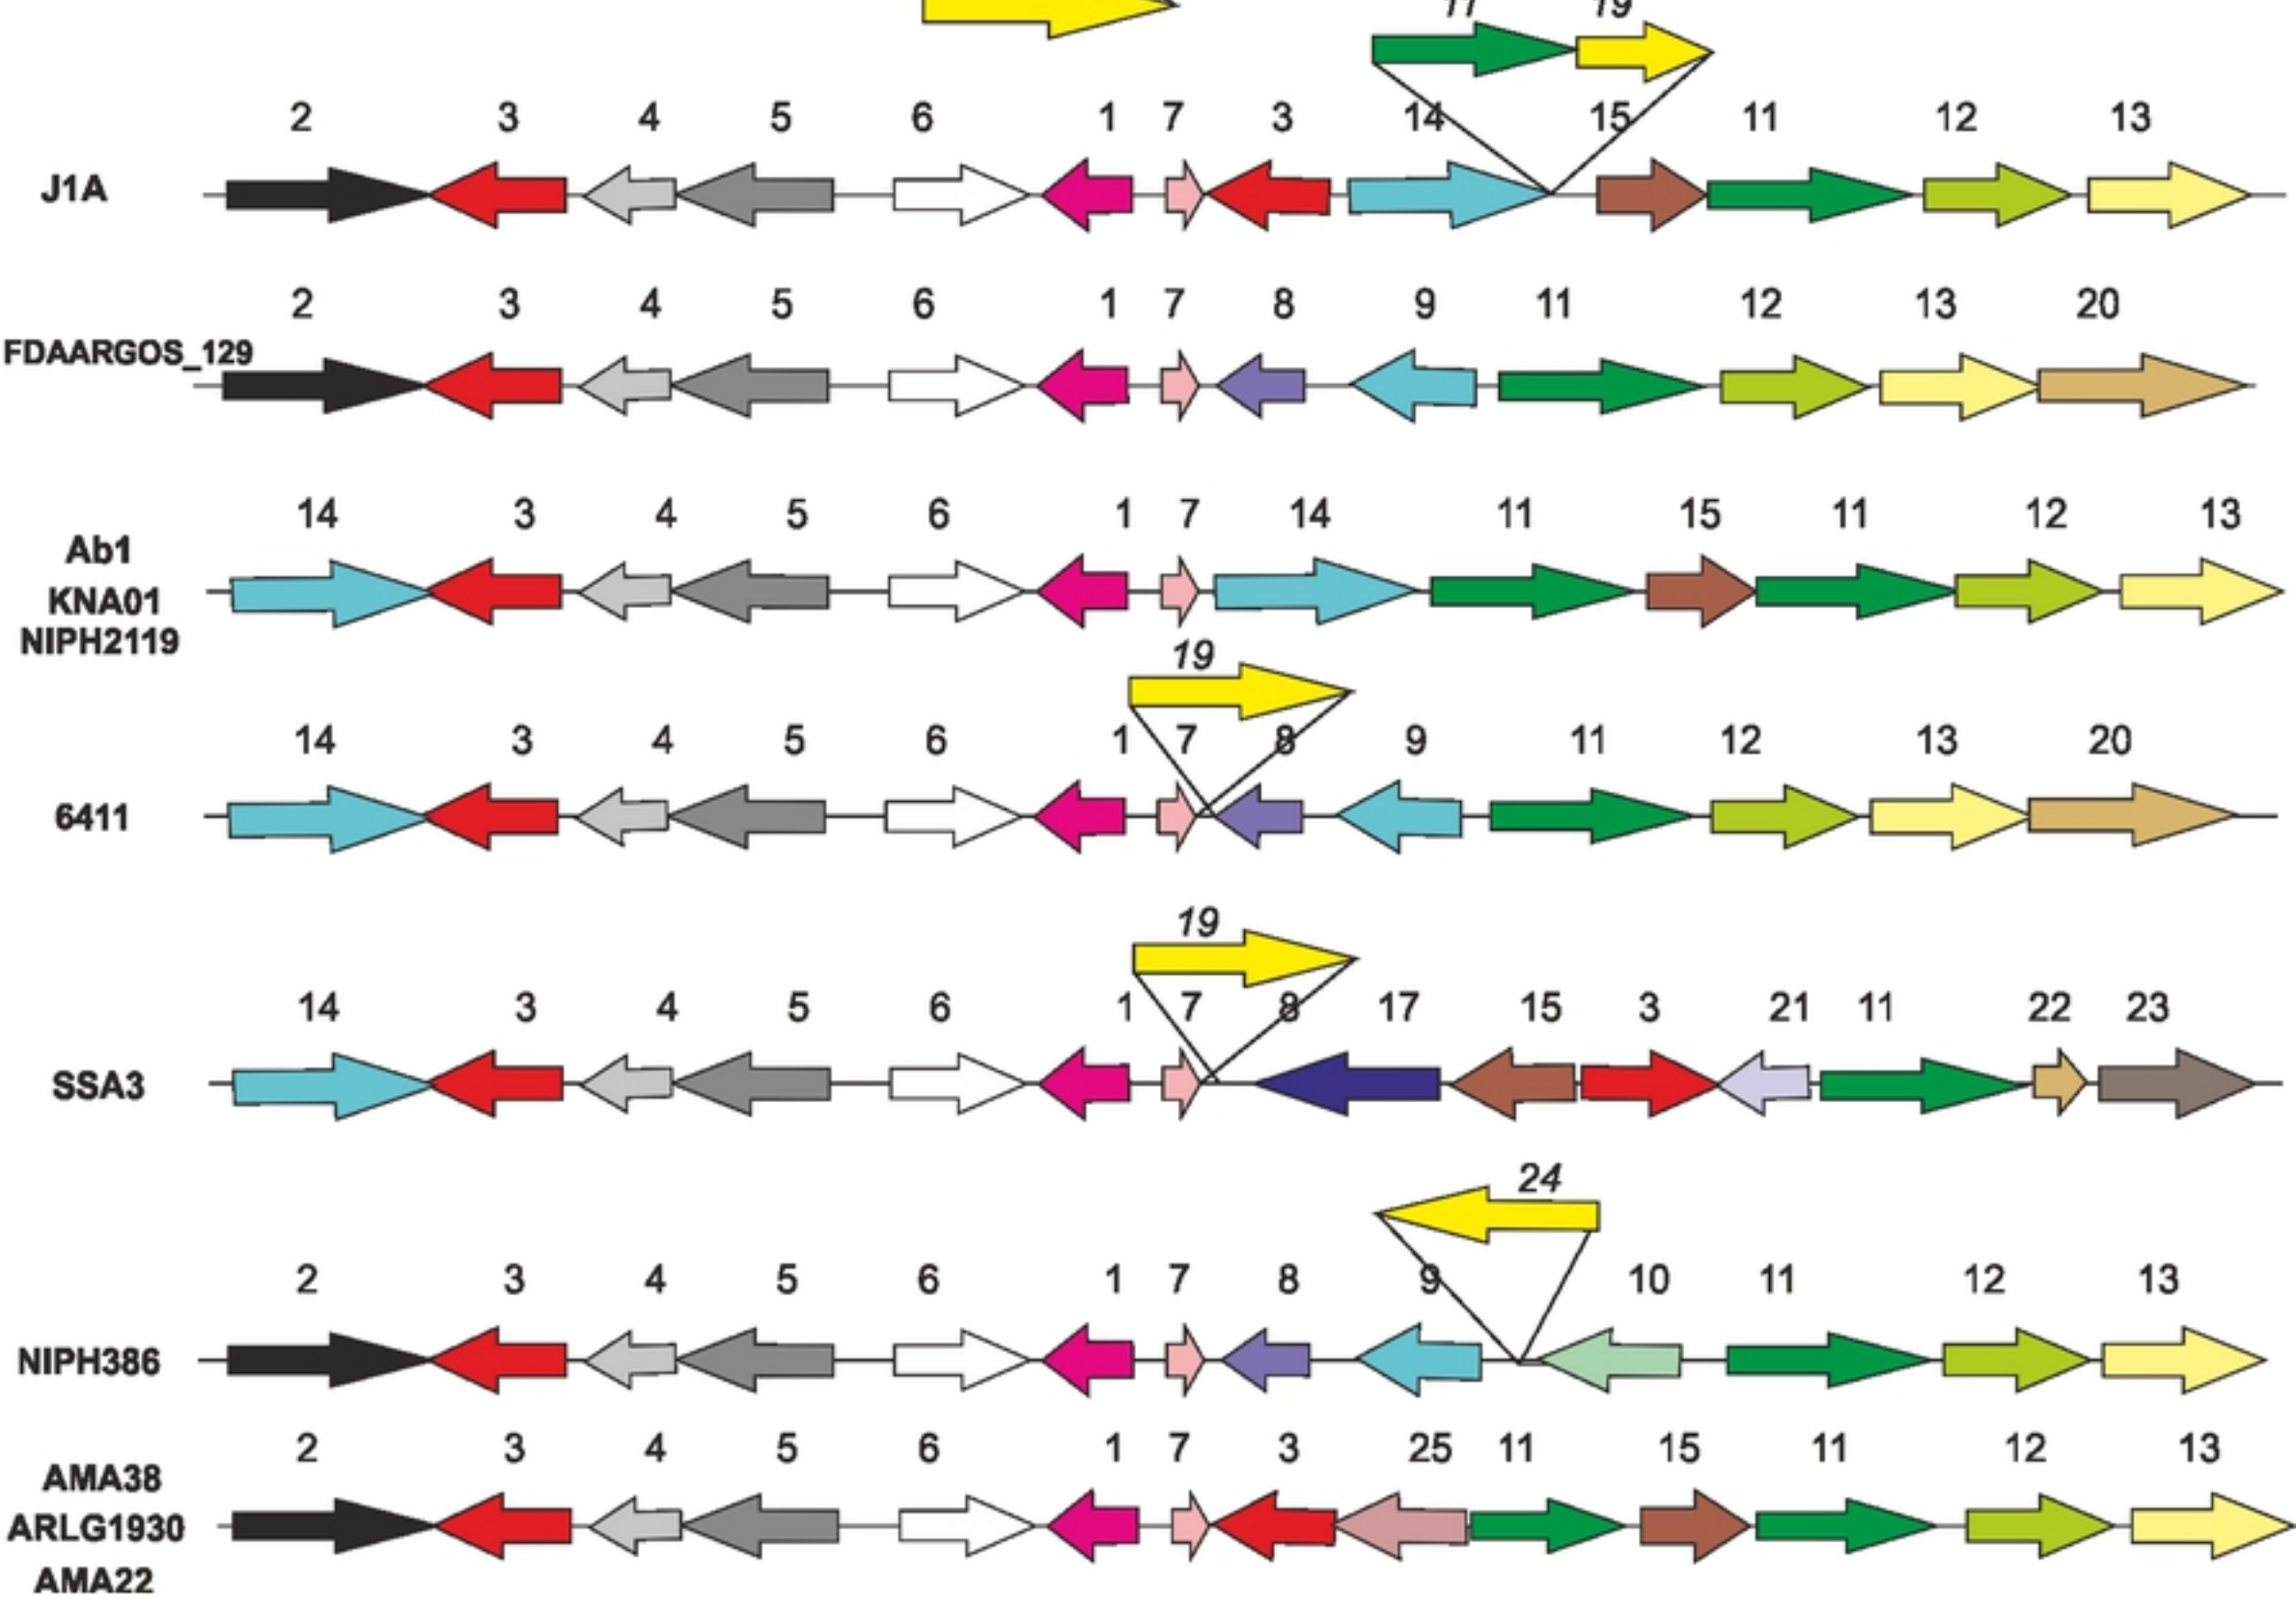

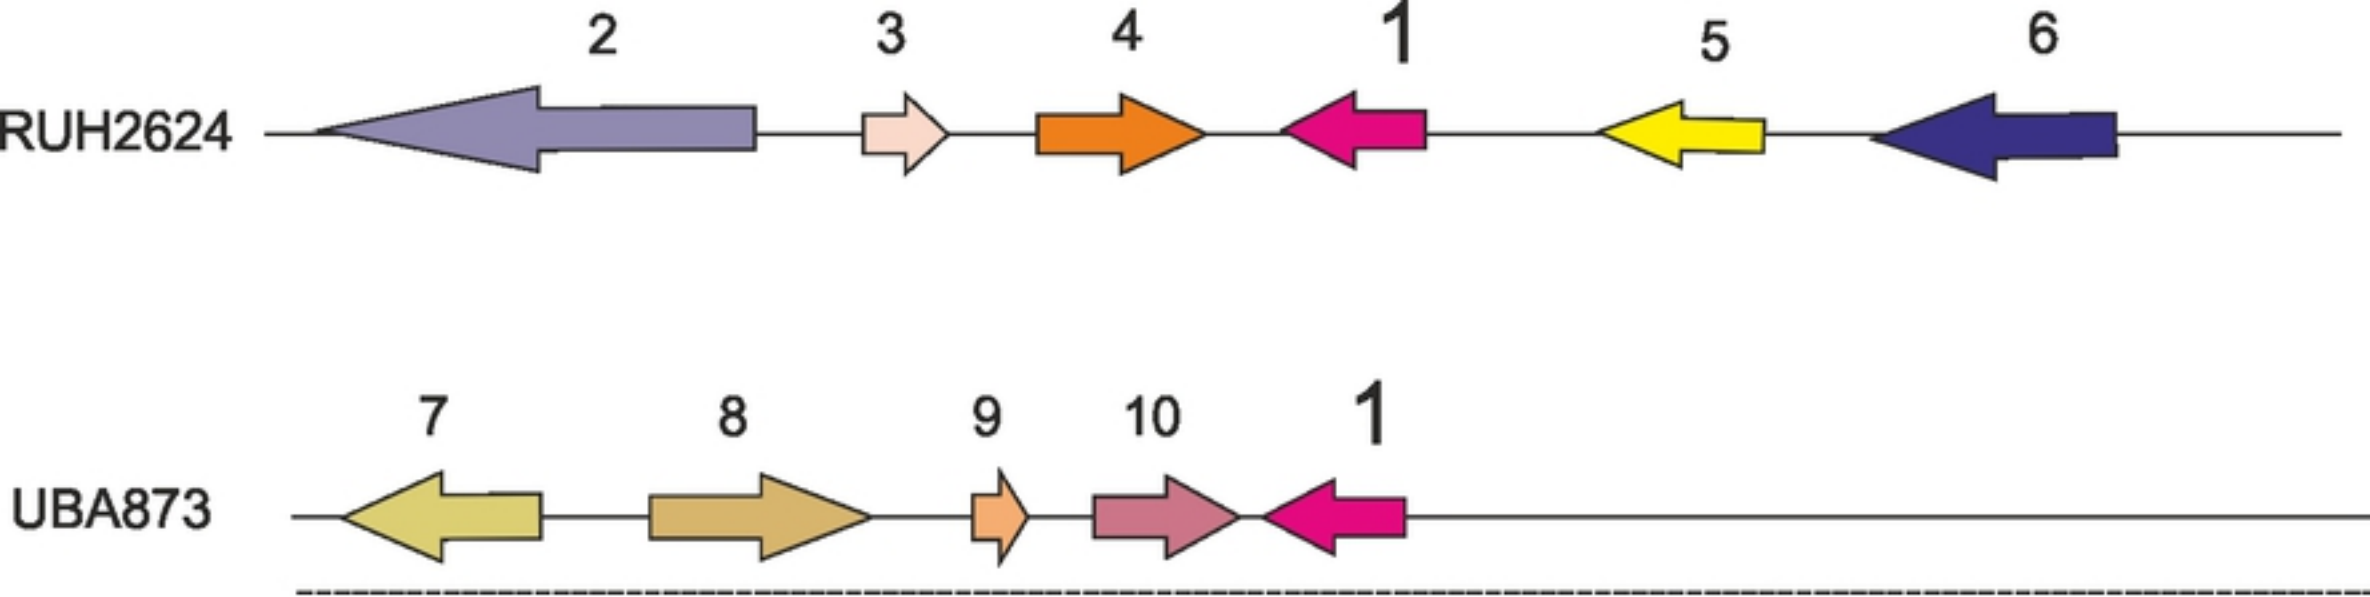

Figure

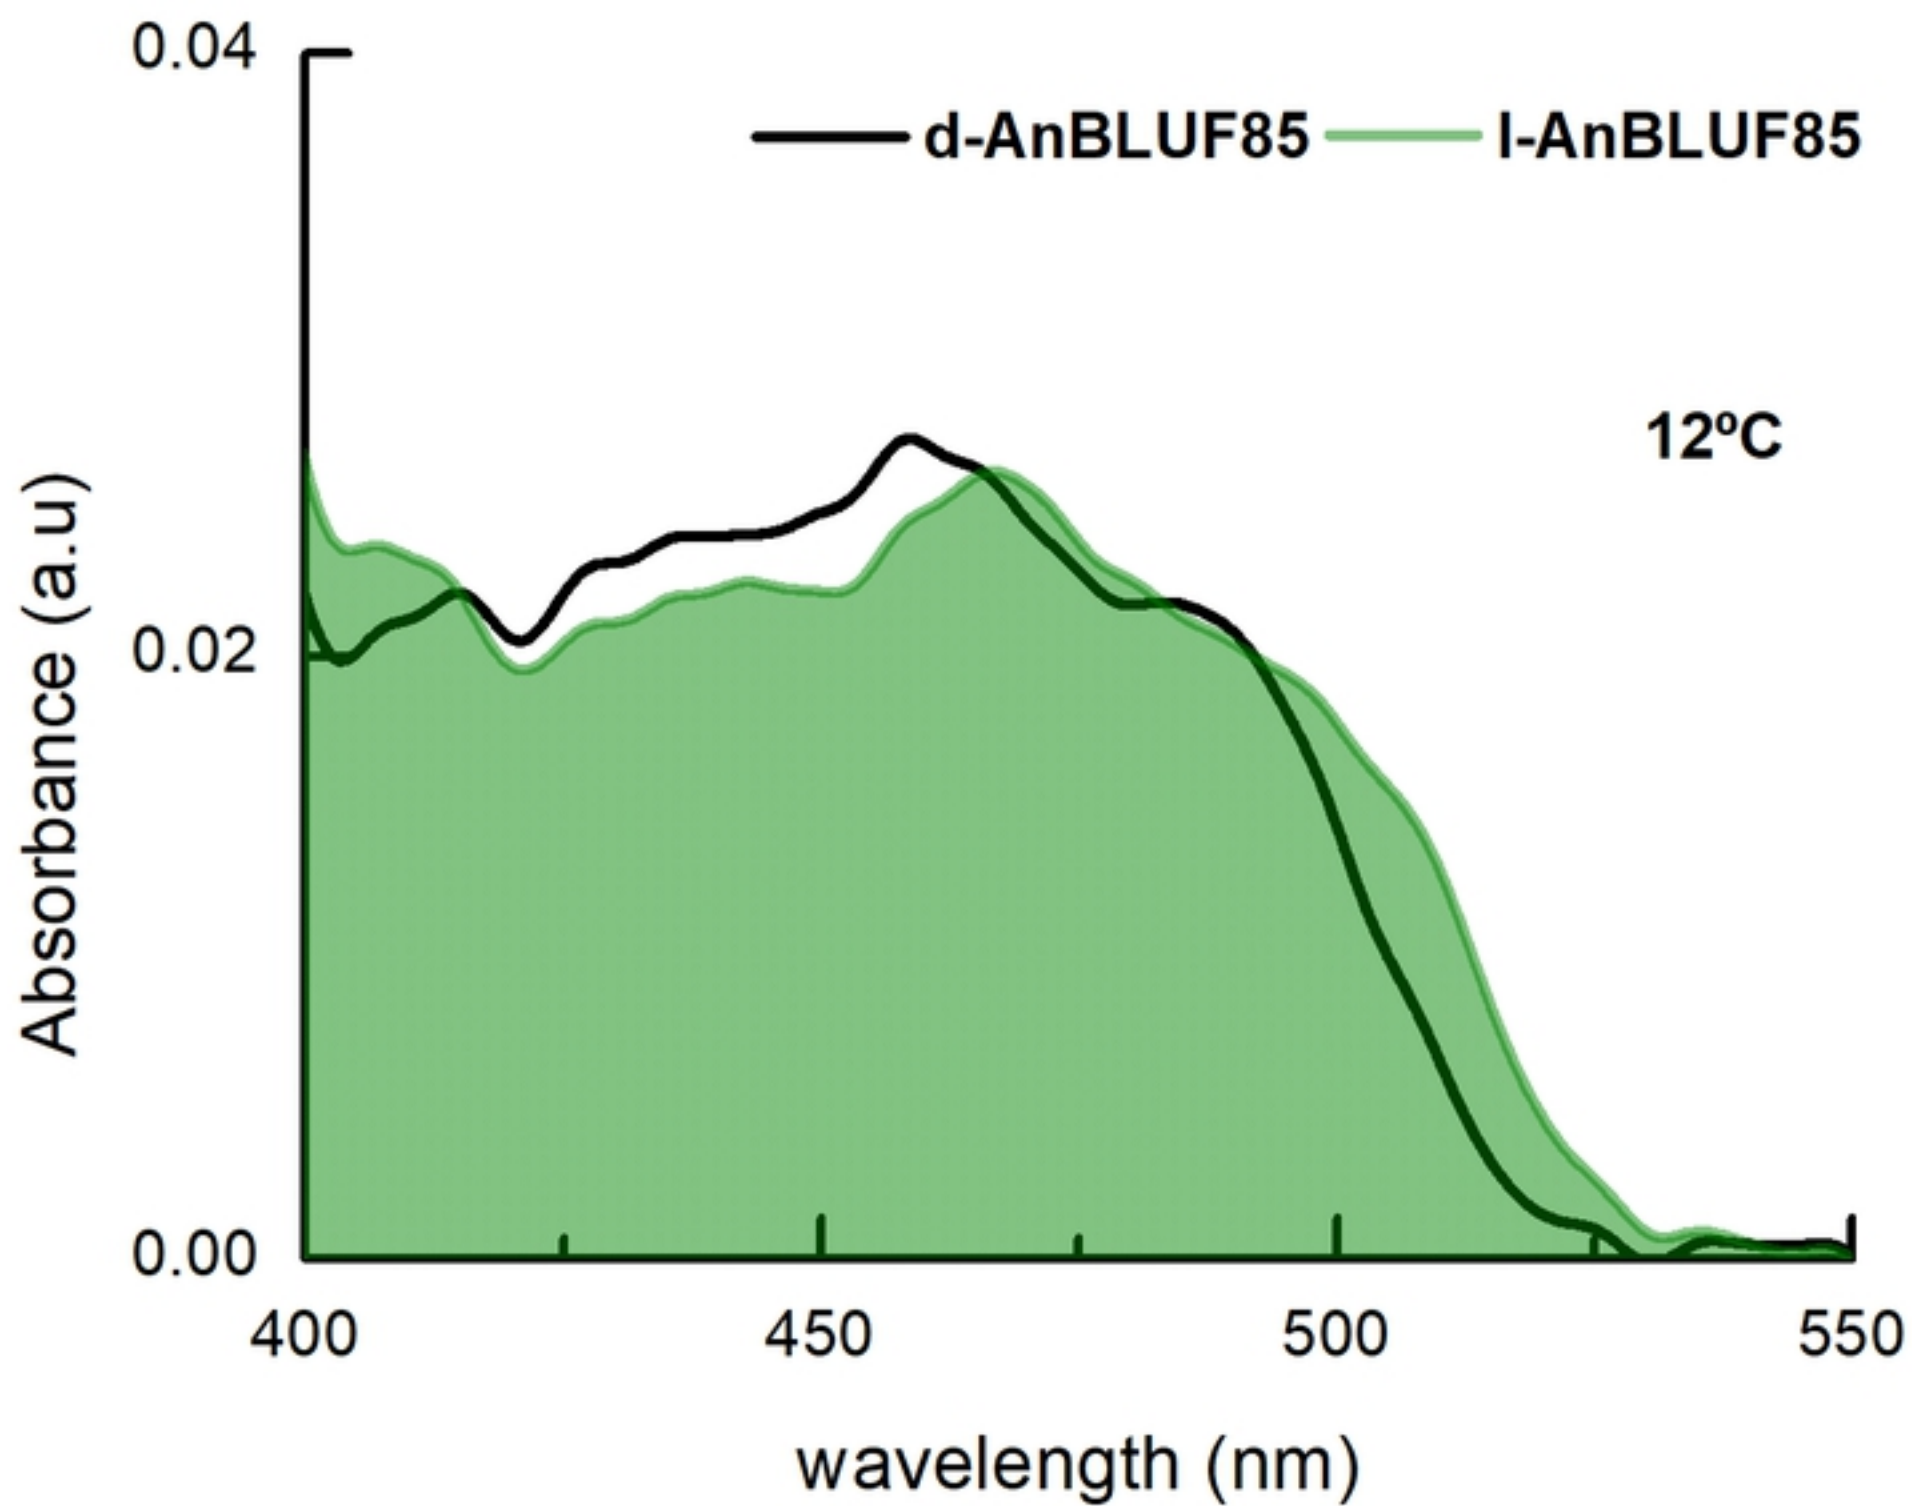

Figure
